# Supplementary material
Source: MDPI journal article supplement (https://www.mdpi.com/1424-2818/11/4/52)
Supplement: s1 [file s1]

```

      10          20          30          40          50          60          70          80
.....|.....|.....|.....|.....|.....|.....|.....|.....|.....|.....|.....|.....|.....|.....|.....|
LC107877   taxid=539210;                                TCTAAGATCATACTTTTC
LC095813   taxid=1752120;                               .....A....TG.A..
KC206040   taxid=446301;                               CGGTCATATGCTTGTCTCAAAGATTAAAGCCATGCATG...T.CA..AG.CGA.T
18S-Pa Plectus acuminat
KU180671   taxid=293684;                               ATGCATG.....TAT.A..GA..T
18S-An Acrobeloides nan
EU306344.1 Acrobeloides
18S-C Cephalobus sp
AF202152.1 Cervidellus                                 ....A..GA..T
AY284668.1 Heterocephal                             CTCAAAGATTAAAGCCATGCATG.N....TAT.A..GA..T
18S-Hb Heterorhabditis
AF202156.2 HalicephaloB                              CAAAGATTAAAGCCATGCATG.....TA...GTGAG.A
KC522707.1 Panagrolaimu
AY268117.1 Caenorhabdi                               GCTTGTCTCAAAGATTAAAGCCATGCATGCT.TGA.....
AF082999.2 Distolabrell                            GATTCTGTcAgTGGCGATATGCTTATgTAtGAGATTAAAGCCATGCATG.A..T.T..-A..CA.cTf
18S-Rb Mesorhabditis be
18S-Ot Oscheius-tipulae
GCGCGctACCTgAttGATTcTgtCAGtGGCGATATgCTTATgTTAAAGATTAAAGCCATGCATG.A.T.-A..GG.cTf
18S-Sf Steinernema felt
AY284686.1 Metateratoce                             CTCAAAGATTAAAGCCATGCATG...G...ATCAG.C.AAA
AY284683.1 Teratocephal                             CTCAAAGATTAAAGCCATGCATG.....CATGAG.CAAATf
18S-Dd Ditylenchus dips
AB368535   taxid=400731;                               TCTTAGTGGAA.A.T
18S-Bx Bursaphelenchus
AB368532   taxid=483518;                               T.C.agT.GAA.G.G
18S-Cr Mesocriconema sp
KJ934161   taxid=1542464;                             AtG.A...TA..CG.C.-.A
EF025336   taxid=411803;                             ATGCATG.....TAT.A..CG.C.
JQ771537.1 Neodolichodo
JQ446376.1 Hemicaloosia                             TTAAGCCATGCATG.A.C..TA..CG.C.-.A
EU306341.1 Hemicyclioph                             TCTCAAAGATTAAAGCCATGCATG.A.C..TA..AG.C.-.A
KJ869397.1 Helicotylenc                             ATG.....TAT.AC..G.C.
AY284609.1 Rotylenchus
18S-Mi Meloidogyne inco
EU306351   taxid=364564;                               TGCTTGTCTCAAAGATTAAAGCCATGCATG.A...TAT.A..GA..T
EU306350.1 Nagelus obsc                             AGATTAAAGCcAGGCATG.A...TAT.G..GA..T
KP966493.1 Paratylenchu
18S-Par Paratylenchus s
EF029855   taxid=406317;                               AAAGATTAAAGCCATGCATG.A...TAT.A..GAc.T
18S-Pp Pratylenchus pen
JQ957898.1 Deladenus du                             ATG..CT..TAT.G..GA..T
AB250212.1 Sphaerularia                             ATGCATG.A...TAT.A..GA..T
FJ969144.1 Trophurus im                             CTCA -AGATTAAAGCCATGCATG.A...TAT.A..GA..T
EU306352   taxid=293578;                             CTCAGAGATTAAAGCCATGCATG.A...TAT.Ac.GA..T
FJ969113   taxid=312543;                             CTCAAAGATTAAAGCCATGCATG.A...TAT.A..GA...
AY284591.1 Filenchus th                             CTCAAAGATTAAAGCCATGCATG.A...TAT.A..GA..T
KJ869373.1 Tylenchus na                             ATG.A...TAT.A..GA..T
AY284812   taxid=288453;                             CTCAAAGATTAAAGCCATGCATG.....CA...G.C..AA
AY284809.1 Paraxonchium                             CTCAAAGATTAAAGCCATGCATG.....CA...G.C..AA
EF207248.1 Mesodorylaim                             ATG.....CA...G.C..AA
AJ966513.1 Wilsonema sc                             CTCAAAGATTAAAGCCATGCATG...T.CA..AG.CGA.T
JX445118   taxid=1309579;
EF207249.1 Xiphinema in                             ATG.....CA...G.C..AA
AJ966472   taxid=344372;                             CTCAAAGATTAAAGCCATGCATG.....CA...G.C..AA
AY284807   taxid=288432;                             CTCAAAGATTAAAGCCATGCATG.....CA...G.C..AA
EF207253   taxid=288458;                             ATG.....CA...G.C..AA
KF583882.1 Mermis nigre
CAQS01000365 taxid=1365                          TCTGGTTgATcCTGCCAgTAGTtATATgCTTGTCTCAAAGATTAAAGCCATGCATG.....CA..GG.C..AA
AJ966474   taxid=288489;                             AAAGATTAAAGCCATGCATG.G...CA...G.C..AA
AY552973   taxid=268226;                             AAAGATTAAAGCCATGCATG.G...CA...G.C..AA
AB361437   taxid=293883;                             TAAGCCATGCATG.G...CA...G.C...A
AF036603   taxid=70239;                             AAAGATTAAAGCCATGCATG.....CA..AG.C.aAG
FJ969141.1 Stenonchulus                             TCaaGATTAAAGCCATGCATG.....CA...G.CC.G

```

|                          | 90                                                                              | 100 | 110 | 120 | 130 | 140             | 150 | 160 |
|--------------------------|---------------------------------------------------------------------------------|-----|-----|-----|-----|-----------------|-----|-----|
| LC107877 taxid=539210;   | .... .... .... .... .... .... .... .... .... .... .... .... .... .... .... .... |     |     |     |     |                 |     |     |
| LC095813 taxid=1752120;  | -ACGGTGAATCTGCGTACGGCTCATTTAAACAGC-TATAATCTACTCGATCTTGA                         |     |     |     |     | CTCCTAAACGGATAA | CT  |     |
| KC206040 taxid=446301;   | -T.ACA.....A.....T.GG..T.G.....A.....T.....T.....T.....                         |     |     |     |     |                 |     |     |
| 18S-Pa_Plectus_acuminat  | -A.T.....G.C...A.T.....C.....C.CTG.T...T.....CT                                 |     |     |     |     | A.....CTT.....  |     |     |
| KU180671 taxid=293684;   | -A.TC.....A.C...A.T.....T.....T.....T.....T.....CACT-A.....CTT.....             |     |     |     |     |                 |     |     |
| 18S-An_Acrobeloides_nan  | -A.TC.....A.C...A.T.....T.....T.....T.....T.....CACT-A.....CTT.....             |     |     |     |     |                 |     |     |
| EU306344.1 Acrobeloides  | -A.TC.....A.C...A.T.....T.....T.....T.....T.....CACT-A.....CTT.....             |     |     |     |     |                 |     |     |
| 18S-C_Cephalobus_sp      | -A.TC.....A.C...A.T.....T.....T.....T.....T.....CACA-A.....CTT.....             |     |     |     |     |                 |     |     |
| AF202152.1 Cervidellus   | -A.TC.....A.C...A.T.....T.....T.....T.....T.....CACA-A.....CCTT.GAT.AC..        |     |     |     |     |                 |     |     |
| AY284668.1 Heterocephal  | -A.TC.....A.C...A.T.....T.....T.....T.....T.....CACA-A.....CCTT.GAT.AC..        |     |     |     |     |                 |     |     |
| 18S-Hb_Heterorhabditis   | ---CAC...A.C...C.AA.....C.....A...G..TA..G.GAGATAC---CAT...T.....T---           |     |     |     |     |                 |     |     |
| AF202156.2 Halicephalob  | ---T...T...CTTTA.....C.T.....                                                   |     |     |     |     |                 |     |     |
| KC522707.1 Panagrolaimu  | -AT.AA...AT.....G.G..A...C.C..TA..CGGGA.CC---TC.T.T.....                        |     |     |     |     |                 |     |     |
| AY268117.1 Caenorhabdit  | -A.T.....A.....A.....C.....T...A...AG.GT..AGC.T...G.GT....C-T.                  |     |     |     |     |                 |     |     |
| AF082999.2 Distolabrell  |                                                                                 |     |     |     |     |                 |     |     |
| 18S-Rb_Mesorhabditis_be  |                                                                                 |     |     |     |     |                 |     |     |
| 18S-Ot_Oscheius-tipulae  | -C...ACCT.....A.....C.....T...A...CG.AT..CGA.TG---T.TTCT....C-T.                |     |     |     |     |                 |     |     |
| AF083015.1 Teratorhabdi  | -A.T...T.....C.....C...G.T...T.....T-A.....CTT.....                             |     |     |     |     |                 |     |     |
| 18S-Sf_Steinernema_felt  | -T.T.....G.C...A.TA.....C.....C..TG.T...T.....T-A.....CTT.....                  |     |     |     |     |                 |     |     |
| AY284686.1 Metateratoce  |                                                                                 |     |     |     |     |                 |     |     |
| AY284683.1 Teratocephal  | AT.AA...A.....A.....C.....A.....T...G...T...TT---GT..T.T.....                   |     |     |     |     |                 |     |     |
| 18S-Dd_Ditylenchus_dips  | AA.AA...A.....A.....C.....G.....T...CA.T.G..CGTT---T.....                       |     |     |     |     |                 |     |     |
| AB368535 taxid=400731;   | AC.A.....A.C...A.....C.....T.....G.....TC-A.GT..CT.....                         |     |     |     |     |                 |     |     |
| 18S-Bx_Bursaphelenchus   | AG....A.A...TA.....G.....TGTCG..T...T.....CC-AC.A..CTT.....                     |     |     |     |     |                 |     |     |
| AB368532 taxid=483518;   | ---C...T...T.....CA-AC...CTT.....                                               |     |     |     |     |                 |     |     |
| 18S-Cr_Mesocriconeuma_sp | AC.A.....A.C...A.....C.....T.....T.....AC-A.GT..CT.....                         |     |     |     |     |                 |     |     |
| KJ934161 taxid=1542464;  | AC.A.....A.C...A.....C.....T.....T.....AC-A.GT..CT.....                         |     |     |     |     |                 |     |     |
| EF025336 taxid=411803;   | AG....A.A...TA.....G.....TGTCG..T...T.....CC-AC.A..CTT.....                     |     |     |     |     |                 |     |     |
| JQ771537.1 Neodolichodo  | ---C...T...T.....CA-AC...CTT.....                                               |     |     |     |     |                 |     |     |
| JQ446376.1 Hemicaloosia  | AC.A.....A.C...A.....C.....T.....T.....AC-A.GT..CT.....                         |     |     |     |     |                 |     |     |
| EU306341.1 Hemicyclioph  | AC.A.....A.C...A.....C.....T.....T.....AC-A.GT..CT.....                         |     |     |     |     |                 |     |     |
| KJ869397.1 Helicotylenc  | AG..A.G...A.....C.C...C-T...T...T...C...CA-AC...CTT.....                        |     |     |     |     |                 |     |     |
| AY284609.1 Rotylenchus   |                                                                                 |     |     |     |     |                 |     |     |
| 18S-Mi_Meloidogyne_inco  | -A.TC.....A.C...A.....T.....T.....T.....CT---CTT.....                           |     |     |     |     |                 |     |     |
| EU306351 taxid=364564;   | -T.TC.....A.C...A.....T.....T.....T.....CT---CTT.....                           |     |     |     |     |                 |     |     |
| EU306350.1 Nagelus_obsc  |                                                                                 |     |     |     |     |                 |     |     |
| KP966493.1 Paratylenchu  |                                                                                 |     |     |     |     |                 |     |     |
| 18S-Par_Pratylenchus_s   | TG.TC.....A.C...A.....T.....TATA.T.TACTGGATCT.GACAC-AA...CTT.....               |     |     |     |     |                 |     |     |
| EF029855 taxid=406317;   |                                                                                 |     |     |     |     |                 |     |     |
| 18S-Pp_Pratylenchus_pen  | -T.TC.....A.C...A.....T.....G.....T.....CAT-A.....CTT.....                      |     |     |     |     |                 |     |     |
| JQ957898.1 Deladenus_du  | -A.TC.....A.C...A.....T.....T.....T.....GA-A.T...CTT.....                       |     |     |     |     |                 |     |     |
| AB250212.1 Sphaerularia  | TG.TC...GA.C..AA.....T.....AATG.T.TACT.GACCT.GATA-AC...CTT.....                 |     |     |     |     |                 |     |     |
| FJ969144.1 Trophurus_im  | TATTN...A.C...A.....T.....TATA.T.TACT.GA..T.GACA-AC...CTT.....                  |     |     |     |     |                 |     |     |
| EU306352 taxid=293578;   | -A.TC.....A.C...A.....T.....T.....T.....CA-A.....CTT.....                       |     |     |     |     |                 |     |     |
| FJ969113 taxid=312543;   | TA.TC...A.C...A.....T.....T.....T.....C..CA-A.....CTT.....                      |     |     |     |     |                 |     |     |
| AY284591.1 Filenchus_th  | TA.TC...A.C...A.....T.....T.....T.....C..CA-A.....CTT.....                      |     |     |     |     |                 |     |     |
| KJ869373.1 Tylenchus_na  | TAC.....G.C...A.TA.....C.....C.CCG.T...A.ATA.AGTT-A.....CTT.....                |     |     |     |     |                 |     |     |
| AY284812 taxid=288453;   | TAC.....G.C...A.TA.....C.....C.CCG.T...A.ATA.AGTT-A.....CTT.....                |     |     |     |     |                 |     |     |
| AY284809.1 Paraxonchium  | TAC.....G.C...A.TA.....C.....C.CCG.T...A.ATA.AGTT-A.....CTT.....                |     |     |     |     |                 |     |     |
| EF207248.1 Mesodorylaim  | TAC.....G.C...A.TA.....C.....C.CCG.T...A.ATA.AGTT-A.....CTT.....                |     |     |     |     |                 |     |     |
| AJ966513.1 Wilsonema_sc  | -A.T.....G.C...A.T.....C.....C.CTG.T...T.....CT-A.....CTT.....                  |     |     |     |     |                 |     |     |
| JX445118 taxid=1309579;  |                                                                                 |     |     |     |     |                 |     |     |
| EF207249.1 Xiphinema_in  | TAC...WT..G.C...A.TA.....C.....C..CG.T...A.AAA.AGTT-G.....GTT.....              |     |     |     |     |                 |     |     |
| AJ966472 taxid=344372;   | TAC.....G.C...A.TA.....C.....C..CG.T...T.A.ATA.CGTT-A.T...CTT.....              |     |     |     |     |                 |     |     |
| AY284807 taxid=288432;   | TAC.....G.C...A.TA.....C.....C..CG.T...T.A.ATA.AGTT-A.....CTT.....              |     |     |     |     |                 |     |     |
| EF207253 taxid=288458;   | TAC.....G.C...A.TA.....C.....C.CCG.T...T.A.ATA.CGTT-A.....CTT.....              |     |     |     |     |                 |     |     |
| KF583882.1 Mermis_nigre  | ---A..G.C...A.T.....GG..T.....CGG.T...T.A..G..TGTT-A.....CTT.....               |     |     |     |     |                 |     |     |
| CAQ801000365 taxid=1365  | AAT...A..G.C...A.T.....GG..T.....CGG.T...T.A..T..AGTT-G.T...CTT.....            |     |     |     |     |                 |     |     |
| AJ966474 taxid=288489;   | AAT...A..G.C...A.T.....GG..T.....C.CCG.T...T.A.....AGTT-A.....CTT.....          |     |     |     |     |                 |     |     |
| AY552973 taxid=268226;   | TAT-A.....G.C...A.T.....GG..T.....C.CCG.T...T.A.....AGTT-A.....CTT.....         |     |     |     |     |                 |     |     |
| AB361437 taxid=293883;   | AAC...A..G.C...A.T.....GG..T.....GC.G.T...T.A..C.A.AGTT-T...CTT.....            |     |     |     |     |                 |     |     |
| AF036603 taxid=70239;    | AAT...A..G.C...A.T.....C.....C..G.T...G.....ACTT---CTT.....                     |     |     |     |     |                 |     |     |
| FJ969141.1 Stenonchulus  | AAC...A..G.C...G.A.....C.....C..G.T...T.A..A..TT---C.T..CTT.....                |     |     |     |     |                 |     |     |

|                          | 170              | 180                                | 190       | 200                          | 210                         | 220                | 230               | 240 |
|--------------------------|------------------|------------------------------------|-----------|------------------------------|-----------------------------|--------------------|-------------------|-----|
| LC107877 taxid=539210;   | GTGTTAATTGTAGAGC | TAATACGTGCACCAAGGCCAGACTCA         | CG        |                              | TAC                         | GGGCGC             | CTTATTAGAACAAAGAC |     |
| LC095813 taxid=1752120;  | .C.A..A.T.G....  | .....T.T..TT.CTCTT                 |           |                              | AG.A..G.....                | TACCG....          | T                 |     |
| KC206040 taxid=446301;   | ...G....C.....   | AC...AT..A..T.C...CTTA             |           |                              | GGAC.A.....                 | T.....C...A..      |                   |     |
| 18S-Pa_Plectus_acuminat  |                  |                                    |           |                              |                             |                    |                   |     |
| KU180671 taxid=293684;   | ...G....C.....   | .....A...TT..A..T.C...CTCA         |           |                              | GGGAA.A.T...T.....          | AC.A.A             |                   |     |
| 18S-An_Acrobeloides_nan  |                  |                                    |           |                              |                             |                    |                   |     |
| EU306344.1 Acrobeloides  | ...G....C.....   | .....A...TT..A..T.T...CTCA         |           |                              | GGGAA.A.T...T.....          | AC.A.A             |                   |     |
| 18S-C_Cephalobus_sp      |                  |                                    |           |                              |                             |                    |                   |     |
| AF202152.1 Cervidellus   | ...G....C.....   | .....A...TT..A..T.T...CT.A         |           |                              | GGGAA.A.T...T.....          | AC.A.A             |                   |     |
| AY284668.1 Heterocephal  | ...G....C.....G  | .....A...TT..A..T.T...CTCA         |           |                              | GGGAC.A.T...T.....          | AC.A.A             |                   |     |
| 18S-Hb_Heterorhabditis   |                  |                                    |           |                              |                             |                    |                   |     |
| AF202156.2 Halicephalob  | .C.G...A.C.G.... | .....A...AT.TATGTTGT.TAGTTATCT     |           |                              | ATAT.ACG...G.....           | AC.A.A             |                   |     |
| KC522707.1 Panagrolaimu  | ...G....C.G....  | .....A...TA..A.ATGTA..ATTATT       |           |                              | GTTACATT..GTA.....          | T.TT.A.A           |                   |     |
| AY268117.1 Caenorhabdit  | .C.GA...AC.G.... | .....A...A.T.TA...CA..G..A         |           |                              | GG.G...T...A.....           |                    |                   |     |
| AF082999.2 Distolabrell  | TCAG....C.G....  | .....A..TT.GC.C.GG..AC.GT          | T         |                              |                             | T.....T-C..        |                   |     |
| 18S-Rb_Mesorhabditis_be  |                  |                                    |           |                              |                             |                    |                   |     |
| 18S-Ot_Oscheius-tipulae  |                  |                                    |           |                              | TC                          | GCTTA.CT...GG..... | T-GC.A.           |     |
| AF083015.1 Teratorhabdi  | TCAG....C.G....  | .....A.T.GT                        | G.TTCGG.. | C                            |                             |                    | T....             |     |
| 18S-Sf_Steinernema_felt  |                  |                                    |           |                              |                             |                    |                   |     |
| AY284686.1 Metateratoce  | ...G....C.....   | AC...A..A...TC...TTA..             |           |                              | GGACA.....T.....            | A..                |                   |     |
| AY284683.1 Teratocephal  | ...G....C.....   | AC...G..A..T...CTTA..              |           |                              | GGAC.A.....T.....           | A..                |                   |     |
| 18S-Dd_Ditylenchus_dips  |                  |                                    |           |                              |                             |                    |                   |     |
| AB368535 taxid=400731;   | .C.G....C.G....  | C.....A...GT...CAT...C..           | TTT       |                              | GGTTGTT.T...T....G..G..A..  |                    |                   |     |
| 18S-Bx_Bursaphelenchus   |                  |                                    |           |                              |                             |                    |                   |     |
| AB368532 taxid=483518;   | .C.G....C.G....  | .....ACGA..ACTT..ATTC..TT.         |           |                              | GA.TT...T...T.....TG..A..   |                    |                   |     |
| 18S-Cr_Mesocriconeuma_sp |                  |                                    |           |                              |                             |                    |                   |     |
| KJ934161 taxid=1542464;  | ...G....C.....   | .....G...T                         | G.C.CTT.. | CG                           | GGGCA.T...T..G..G..         | GC.A.A             |                   |     |
| EF025336 taxid=411803;   | ...G....C.....   | .....A...A..T.T..GCGCA.            |           | CG                           | AG.A...T...C.CCAC.A.A       |                    |                   |     |
| JQ771537.1 Neodolichodo  | ...G....C.....   | .....A...A..T.C..TCT-TTA           |           | CG                           | AGAG.A.T...T..G..C.CCAC.A.A |                    |                   |     |
| JQ446376.1 Hemicaloosia  | ...G....C.....   | .....G.A..T                        | GTC.CT.A  | CG                           | GGGCA.T...T...T..           | GC.A.A             |                   |     |
| EU306341.1 Hemicycliopia | ...G....C.....   | .....T.....A..T                    | GTC.CT.   | CA                           | GGGCA.T...T...G..           | GC.A.A             |                   |     |
| KJ869397.1 Helicotylenc  | ...G....C.....   | .....A...A..T.C..TC..T..           |           | CGGAGAG.A...T..G..C.CCAC.A.A |                             |                    |                   |     |
| AY284609.1 Rotylenchus   | ...G....C.G....  | .....A...A..T.C..TC.CTT.           |           | CGGAGAG.A...T..G..C.CCAC.A.A |                             |                    |                   |     |
| 18S-Mi_Meloidogyne_inco  |                  |                                    |           |                              |                             |                    |                   |     |
| EU306351 taxid=364564;   | ...G....C.....   | .....A...A..T.C...CTTA.            |           |                              | GGGAA.A...T...C..           | AC.A.A             |                   |     |
| EU306350.1 Nagelus_obsc  | ...G....C.....   | .....A...A..T.C...CTTA.            |           |                              | GGGAA.A...T...C..           | AC.A.A             |                   |     |
| KP966493.1 Paratylenchu  | ...G....C.....   | .....A...G.A.TT                    | GT..CTT.  | CG                           | GAGCAAT...T...T..           | GC.A.A             |                   |     |
| 18S-Par_Pratylenchus_s   |                  |                                    |           |                              |                             |                    |                   |     |
| EF029855 taxid=406317;   | ...G....C.....   | .....A...A.....CGCAA.              |           | GG                           | AC.....T..G....             | AC.A.A             |                   |     |
| 18S-Pp_Pratylenchus_pen  |                  |                                    |           |                              |                             |                    |                   |     |
| JQ957898.1 Deladenus_du  | ...G....C.....   | .....A...A..T.T...CTCG..           |           |                              | G.AA.A.T...T.....           | GC.A.A             |                   |     |
| AB250212.1 Sphaerularia  | ...G....C.....   | .....A...TTAC.T..T.T...CTTG.       |           |                              | GG.AA.A.T...T.....          | AC.A.A             |                   |     |
| FJ969144.1 Trophurus_im  | ...G....C.....   | .....A...A..T.C...CGTGA.           |           | GA                           | AG.A...T.....               | AC.A.A             |                   |     |
| EU306352 taxid=293578;   | ...G....C...C..  | .....A...A..T.C...CGCGA.           |           | GG                           | AA.A...T.....               | AC.A.A             |                   |     |
| FJ969113 taxid=312543;   | ...G....C.....   | .....A...A..T.T...CTTA.            |           |                              | GGGAA.A.T...T.....          | AC.A.A             |                   |     |
| AY284591.1 Filenchus_th  | ...G....C.....   | .....A...A..T.T...CTTG.AG          |           | AAGGGAA.A.T...T...TT-TG.A.A  |                             |                    |                   |     |
| KJ869373.1 Tylenchus_na  | ...G....C.....   | .....A...A..T.T...CTTG.AG          |           | AAGGGAA.A.T...T...TT-TG.A.A  |                             |                    |                   |     |
| AY284812 taxid=288453;   | ...GC...C.....   | .....A...AA.A..T.T.C.CGCAA         |           | GG.AC.A...T.....             | T..A.A                      |                    |                   |     |
| AY284809.1 Paraxonchium  | ...G....C.....   | .....A...AA.A..T.T...CGCAA         |           | GG.AC.A...T.....             | T..A.A                      |                    |                   |     |
| EF207248.1 Mesodorylaim  | ...GC...C.....T  | .....A...AC.A..T.C.C.CGCAA         |           | GG.AC.A...T.....             | T..A.A                      |                    |                   |     |
| AJ966513.1 Wilsonema_sc  | ...G....C.....   | .....A...AAC.A..T.C...CTTA.        |           |                              | GGAC.A...T.....C..A..       |                    |                   |     |
| JX445118 taxid=1309579;  |                  |                                    |           |                              |                             |                    |                   |     |
| EF207249.1 Xiphinema_in  | ...GC...C.....   | .....A...GAA..AA.T...CGTAA         |           | GG.AT.A.T...T.....           | T..A.A                      |                    |                   |     |
| AJ966472 taxid=344372;   | ...GC...C.....   | .....A...AT..A..T.C.C.CG.AA        |           | GG.AC.A...T.....             | T..A.A                      |                    |                   |     |
| AY284807 taxid=288432;   | ...GC...C.....   | .....A...T..A..T.T.C.CGCAA         |           | GG.AC.A...T.....             | T..A.A                      |                    |                   |     |
| EF207253 taxid=288458;   | ...GC...C.....   | .....A...AA.A..T.C.C.CGCGA         |           | GG.AC.A...T.....             | T..A.A                      |                    |                   |     |
| KF583882.1 Mermis_nigre  | ...G....C.....   | .....A...AG..A..T.G...CTTC         |           | GGG.AA.A...T.....            | TC.A.A                      |                    |                   |     |
| CAQ801000365 taxid=1365  | ...G....C.....   | .....A...TT.A..T.G...CTCTTCACGGGGG |           | AA.A...T.....                | TC.A.A                      |                    |                   |     |
| AJ966474 taxid=288489;   | ...GC...C.....   | .....A...GT.A..T.G...CTTAG         |           | GG.AA.A...T.....             | C.A.A                       |                    |                   |     |
| AY552973 taxid=268226;   | ...GC...C.....   | .....A...G...T.G...CTTAG           |           | GGGAA.A...T.....             | C.A.A                       |                    |                   |     |
| AB361437 taxid=293883;   | ...GC...C.....   | .....A...G..A..T.G...CTCGC         |           | GG.AA.A...T.....             | C.A.A                       |                    |                   |     |
| AF036603 taxid=70239;    | ...G....C.....   | .....AC..TG..A..T.T...CGTT         |           | GGGAG.A...T.....             | AC.A.A                      |                    |                   |     |
| FJ969141.1 Stenonchulus  | ...G....C.....   | .....A...A...CTT.CTTA.             |           | GAGAG...T.....               | AC.AGG                      |                    |                   |     |

|                          | 250        | 260           | 270               | 280             | 290               | 300        | 310           | 320             |
|--------------------------|------------|---------------|-------------------|-----------------|-------------------|------------|---------------|-----------------|
| LC107877 taxid=539210;   | CAATCGGG   | AA ACCG       | CTTTGGTGACTCTGAAT | AATTT           | CGCTGATCCACGGTCTG | GAACCGGCGA |               |                 |
| LC095813 taxid=1752120;  | T..A...CC  | TCGG          | T...              |                 |                   | C...T.T    | AC...         | G               |
| KC206040 taxid=446301;   | .....CT    | TCGG          | C.T.AGC           | G...            | C.G               | A.....T    | T.T           |                 |
| 18S-Pa_Plectus_acuminat  |            |               |                   |                 |                   |            |               |                 |
| KU180671 taxid=293684;   | .C.AGC..CT | TC            | GG.TGTTTC         | G.T....         | AT.G...C.G        | A.....T    | T             | T               |
| 18S-An_Acrobeloides_nan  |            |               |                   |                 |                   |            |               |                 |
| EU306344.1 Acrobeloides  | .C.AGC..CT | TC            | GG.TGTTTC         | G.T....         | AT.G...C.G        | A.....T    | T             | C               |
| 18S-C Cephalobus_sp      |            |               |                   |                 |                   |            |               |                 |
| AF202152.1 Cervidellus   | .C.AGC..CT | TC            | GG.TGTTTC         | G.T....         | AT.G...C.G        | A.....T    | T             | C               |
| AY284668.1 Heterocephal  | .C.AGC..CT | TC            | GG.TGTTTC         | G.T....         | AT.G...C.G        | A.....T    | T             | C               |
| 18S-Hb_Heterorhabditis   |            |               |                   |                 |                   |            |               |                 |
| AF202156.2 Halicephalob  | .C.AT...CT | TTG..CATT     | A..T.A...         | AG....GC        | TC..C.AT...       | AT.AATT    | T...AT        | G               |
| KC522707.1 Panagrolaimu  | .C.AGCATTC | TTTCGGGGAT    | TTTAG..T...       | AC....TA        | C..T...A...       | T.T...     | T             | A               |
| AY268117.1 Caenorhabdit  | ..A..TTTT  | CGG..CGTT     | G...T....         | AGC             | A.T.T.CT          | TCA.T.TC   |               | T.A.TC          |
| AF082999.2 Distolabrell  | ...C..CTTC | GG            | CGTA              | TAG..A....      | TC                | C          | G             | CAGA.CGCAT.CGAA |
| 18S-Rb_Mesorhabditis_be  |            |               |                   |                 |                   |            |               |                 |
| 18S-Ot_Oscheius-tipulae  | .C.ATC.TTT | TCGGACGTAG    | ...C....          |                 | CC.GTAT           | TC.A.G     | TTT           | T...T...        |
| AF083015.1 Teratorhabdi  | ..C..CTTC  | GG            | CGTT              | T.G..T....      | T...              | G          | CAGA.CGCAT.CG | A...G....G      |
| 18S-Sf_Steinernema_felt  |            |               |                   |                 |                   |            |               |                 |
| AY284686.1 Metateratoce  | .....CC    | TCGG          | T...CGGT          | A...A....       | C..               | T.....     | T.T           | T.....          |
| AY284683.1 Teratocephal  | .....CT    | TCGG          | CT..              | C.....          | C.C               | A.....     | T             | T...C.....      |
| 18S-Dd_Ditylenchus_dips  |            |               |                   |                 |                   |            |               |                 |
| AB368535 taxid=400731;   | ..G..TTT   |               | GA                | CGG...C.A....   | G....A            | T.TAT      | .....T        | T.....          |
| 18S-Bx_Bursaphelenchus   |            |               |                   |                 |                   |            |               |                 |
| AB368532 taxid=483518;   | ..G..TTT   |               | GAACGTG           | ...C.T.A..C.... | CCG               | TTTAT      | .....T        | .....           |
| 18S-Cr_Mesocriconeuma_sp |            |               |                   |                 |                   |            |               |                 |
| KJ934161 taxid=1542464;  | .C.GGC.ACT | TC            | GGTCGTTT          | ...C....AT      | C..C..            | A.....T    | G..T          | TC.....         |
| EF025336 taxid=411803;   | .C.AGC..CT | CC            | GG.CGTT           | G..T....A...    | C..TTA            | .....T     |               | C.....          |
| JQ771537.1 Neodolichodo  | .C.AGC.CCT | TC            | GGGCGTT           | G..T....A       | GC..CA            | A.....T    |               | .....           |
| JQ446376.1 Hemicaloosia  | .C.GGC..CT | TC            | GG.CGTTT          | ...T...A..A.... | C.A               | A....C...  | TA.G..T       | TC.T...G        |
| EU306341.1 Hemicyclioph  | .C.GGC..CT | TC            | GG.CGTTT          | ...C...A....    | C.A               | A....C...  | T..G..T       | TC.....G        |
| KJ869397.1 Helicotylenc  | .C.AGC.CCC | TTCT          | GGGCGTC           | AG..C...AC      | A..C..C           | A.....T    |               | C.....          |
| AY284609.1 Rotylenchus   | .C.AGC.CCC | TC.C          | GGGCGTT           | AGC.T....A....  | C.A               | A.....T    |               | C.....          |
| 18S-Mi_Meloidogyne_inco  |            |               |                   |                 |                   |            |               |                 |
| EU306351 taxid=364564;   | .C.AGC..CT | TC            | GG.CGTC           | GCA.T....A....  | C.A               | A.....T    | T             | .....           |
| EU306350.1 Nagelus_obsc  | .C.AGC..CT | TC            | GG.CGTT           | ACA.T....A....  | C.A               | A.....T    | T             | .....           |
| KP966493.1 Paratylenchu  | .C.GGC..CT | TC            | GG.CGTTTC         | ...T...T..A.... | C.A               | A.....T    | G..T          | TC.....         |
| 18S-Par_Pratylenchus_s   |            |               |                   |                 |                   |            |               |                 |
| EF029855 taxid=406317;   | .C.AGC..CT | TC            | GG.CGTC           | AG..T....A....  | C.A               | A.....T    | T             | .....           |
| 18S-Pp_Pratylenchus_pen  |            |               |                   |                 |                   |            |               |                 |
| JQ957898.1 Deladenus_du  | .C.AGC..CT | TC            | GGTCGTTT          | ...C....A....   | C.C               | A.....T    | T             | .....           |
| AB250212.1 Sphaerularia  | .C.GGC..CC | TC            | GGTCGTTT          | ...T....AA....  | C..               | A.....T    | T             | A.T.....        |
| FJ969144.1 Trophurus_im  | .C.AGC..CT | TC            | GG.CGTC           | AA..T....AA.... | C.C               | A.....T    | T             | .....           |
| EU306352 taxid=293578;   | .C.CAC..CT | TC            | GG.CGTC           | AA..T....A....  | C.A               | A.....T    | T             | C.....          |
| FJ969113 taxid=312543;   | .C.AGC..CT | TC            | GGTCGTTT          | ...T....A....   | C.A               | A.....T    | T             | .....           |
| AY284591.1 Filenchus_th  | .C.AGC..CT | TC            | GGTCGTTT          | ...T....A....   | C.A               | A.....T    | T             | .....           |
| KJ869373.1 Tylenchus_na  | .C.AGC..CT | TC            | GGTCGTTT          | ...T....A....   | C.A               | A.....T    | T             | .....           |
| AY284812 taxid=288453;   | .C.ATC..GT | TTTCG         | G..CGTAA          | ....A....C..    | T..CA             | K...A..CT  | A.T..T        | .....           |
| AY284809.1 Paraxonchium  | .C.ATC..GT | TTTCG         | G..CGTAA          | ....A....C..    | T..CA             | ....A..CT  | A.T..T        | .....           |
| EF207248.1 Mesodorylaim  | .C.ATC..GT | TTTCG         | G..CGTAA          | ....A....C..    | T..CA             | ....A..CT  | A.T..T        | .....           |
| AJ966513.1 Wilsonema_sc  | .....CT    | TCGG          | C.T.AGA           | G....C.G        | A.....T           | T          | T.T           | .....           |
| JX445118 taxid=1309579;  |            |               |                   |                 |                   |            |               |                 |
| EF207249.1 Xiphinema_in  | .C.ATC..GT | GTA..AAG      | .CGTCA            | ....A....C..    | T..C              | ....CT     | A.T           | .....           |
| AJ966472 taxid=344372;   | .C.ATC.AGC | TTTCG         | G..TCGTAA         | ....A....C..    | T..CA             | ....A..CT  | A.T..T        | .....           |
| AY284807 taxid=288432;   | .C.ATC..GT | TTTCG         | G..CGTAA          | ....A....C..    | T..CA             | ....A..CT  | A.T..T        | .....           |
| EF207253 taxid=288458;   | .C.ATC..GT | CTCG          | G..CGTAA          | ....A....C..    | T..CA             | ....A..CT  | A.T..T        | .....           |
| KF583882.1 Mermis_nigre  | .C.ATC..GC | TTTTGC        | T..T              | GT....C.C       | A.T....A...       | C          | C             | T.....          |
| CAQ801000365 taxid=1365  | .C.ATC..GT | CTCGGC        | ...TTGT           | ....C.A         | T.G....A...       | AC         | T             | T.....          |
| AJ966474 taxid=288489;   | .C.ATCAAGC | TTTCGGC       | TT.T              | GT....C.A       | A.T....A...       | T          | A             | T.....          |
| AY552973 taxid=268226;   | .T.ATCA.GC | TTTCGGC       | TT.T              | GT....C.A       | A.T....A...       | T          | A             | T.....          |
| AB361437 taxid=293883;   | .C.ATC..GC | CGCTTCGGCGCTT | G                 | TT....C..       | A.T....A...       | T          | A             | T.....          |
| AF036603 taxid=70239;    | .C.ATC..GC | CTTCGG        | G..CGCCAG         | ....A....C..    | T..A              | ....C      | T             | .....           |
| FJ969141.1 Stenonchulus  | .C.ATC..GC | TTTCGG        | GT.CGTCA          | ....A....CC     | T.....T           | TTA        | T             | .....           |

|                         | 330           | 340         | 350         | 360             | 370             | 380           | 390        | 400       |
|-------------------------|---------------|-------------|-------------|-----------------|-----------------|---------------|------------|-----------|
| LC107877 taxid=539210;  | CGTATCGTT     | CGAGTGTCT   | GCCTTATCA   | ACTTTCGAT       | TGGAAGTCC       | ATGTGACTAC    | CATGGTTGTT | ACGGGTAAC |
| LC095813 taxid=1752120; | ..T..A...     | ..CC.A..    | ..A.C...    | ..A..T...       | ..G....         | ..A..G..      | ..G....    | ..G....   |
| KC206040 taxid=446301;  | ..C...T...    | ..A.....    | .....T...   | ..TT...         | ..C.....        | .....         | .....      | .....     |
| 18S-Pa_Plectus_acuminat | ..G..T...     | ..A....     | ..G.....    | ..T...GT..      | ..C.....        | ..GA.C...     | ..C....    | .....     |
| KU180671 taxid=293684;  | ..G..T...     | ..A....     | ..G.....    | ..T...GT..      | ..C.....        | ..GA.C...     | ..C....    | .....     |
| 18S-An_Acrobeloides_nan | ..G..T...     | ..A....     | ..G.....    | ..T...GT..      | ..C.....        | ..GA.C...     | ..C....    | .....     |
| EU306344.1 Acrobeloides | ..G..T...     | ..A....     | ..G.....    | ..T...GT..      | ..C.....        | ..GA.C...     | ..C....    | .....     |
| 18S-C_Cephalobus_sp     | ..G..T...     | ..A....     | ..G.....    | ..T...GT..      | ..C.....        | ..GA.C...     | ..C....    | .....     |
| AF202152.1 Cervidellus  | ..G..T...     | ..A....     | ..G.....    | ..T...GT..      | ..C.....        | ..GA.C...     | ..C....    | .....     |
| AY284668.1 Heterocephal | ..G..T...     | ..A....     | ..G.....    | ..T...GT..      | ..C.....        | ..GA.C...     | ..C....    | .....     |
| 18S-Hb_Heterorhabditis  | AAGGC...A     | TTT...A...  | ..C.....    | ..A-T..AACC     | ..GT..TGA..     | GGTT...GT.GC  | .....      | .....     |
| AF202156.2 Halicephalob | TA.G..A...    | ..A.....    | ..ATC.....  | ..T..AT...      | ..AT..AGT...    | ..TAT...T.G.. | ..A....    | ..G.T.    |
| KC522707.1 Panagrolaimu | TA.CCG.AAA    | ..G.....    | ..C.T...    | ..A-...T..      | ..TT..TG...     | .....         | .....      | .....     |
| AY268117.1 Caenorhabdit | ..AT..ACGTA   | ..T.AA...   | ..C.....    | ..T...T...TTCGT | ..T.....        | ..GA.A...     | .....      | ..G.      |
| AF082999.2 Distolabrell | AAGC...GAAT   | .....C..... | ..A-...T... | ..T..TA...      | .....           | ..GA.A...     | .....      | .....     |
| 18S-Rb_Mesorhabditis_be | ..G..A.G...   | ..T.AA...   | ..C.....    | ..T...T...TT    | ..GT.....       | ..GA.A...     | .....      | ..G.      |
| 18S-Ot_Oscheius-tipulae | ..C...T...A   | .....       | .....       | ..T.CGTT...     | ..C.....        | ..A....       | .....      | .....     |
| AF083015.1 Teratorhabdi | ..TC...T...A  | .....       | .....       | ..T.ATT...      | ..T.....        | ..A....       | .....      | .....     |
| 18S-Sf_Steinernema_felt | AT.T..T...A   | ..A....     | ..T.....    | ..A..T...TG..   | ..TT..TG...     | .....         | ..G....    | .....     |
| AY284686.1 Metateratoce | AAA...TG..A   | ..A....     | .....       | ..G...T...TGC   | ..GT..TG..G...  | ..GT.A..A...  | .....      | .....     |
| AB368535 taxid=400731;  | ..C...C...    | .....       | .....       | ..T..GT...      | .....           | ..G....       | .....      | ..G.      |
| 18S-Cr_Mesocriconema_sp | ..G..T...A    | ..CA.....   | .....       | ..T.C.C..GGT    | ..A..C..G..G... | ..G....       | .....      | ..G.      |
| KJ934161 taxid=1542464; | ..G..T...A    | .....       | .....       | ..T..GT...      | .....           | ..GA.G...     | .....      | ..G.      |
| EF025336 taxid=411803;  | ..G.....      | .....       | .....       | ..T..GT...      | .....           | ..G....       | .....      | ..G.      |
| JQ771537.1 Neodolichodo | ..G.....      | .....       | .....       | ..T..GT...      | .....           | ..G....       | .....      | ..G.      |
| JQ446376.1 Hemicaloosia | ..G.....      | .....       | .....       | ..T..GT...      | .....           | ..G....       | .....      | ..G.      |
| EU306341.1 Hemicyclioph | ..G..T...A    | .....       | .....       | ..T..GT.C...    | .....           | ..G....       | .....      | ..G.      |
| KJ869397.1 Helicotylenc | ..G..T...A    | .....       | .....       | ..T..GT.CC...   | .....           | ..G....       | .....      | ..G.      |
| AY284609.1 Rotylenchus  | ..G..T...A    | .....       | .....       | ..T..GT.CC...   | .....           | ..GA.G...     | .....      | ..G.      |
| 18S-Mi_Meloidogyne_inco | ..G..T...A    | ..A....     | .....       | ..T..GT..C...   | .....           | ..G..G...     | .....      | ..G.      |
| EU306351 taxid=364564;  | ..G..T...A    | ..A....     | .....       | ..T..GT..C...   | .....           | ..G..G...     | .....      | ..G.      |
| EU306350.1 Nagelus obsc | ..G..T...A    | .....       | .....       | ..T..GT.C...    | .....           | ..GT.G...     | .....      | ..G.      |
| KP966493.1 Paratylenchu | ..G..T...A    | ..A....     | .....       | ..T..GT..A...   | .....           | ..G..G...     | .....      | ..G.      |
| 18S-Par_Pratylenchus_s  | ..G..T...T... | ..AG.....   | ..T.....    | ..T..GT..TG...  | .....           | ..GT.G...     | .....      | .....     |
| EF029855 taxid=406317;  | ..G..T...A    | ..A....     | .....       | ..T..GT..T...   | .....           | ..G..G...     | .....      | ..G.      |
| 18S-Pp_Pratylenchus_pen | ..G..T...A    | ..A....     | .....       | ..T..GT..T...   | .....           | ..G..G...     | .....      | ..G.      |
| JQ957898.1 Deladenus du | ..G..T...A    | ..A....     | .....       | ..T..GT..T...   | .....           | ..G..G...     | .....      | ..G.      |
| AB250212.1 Sphaerularia | ..G..T...A    | ..T....     | .....       | ..T.CGT...      | .....           | ..G..G...     | .....      | ..G.      |
| FJ969144.1 Trophurus im | ..T..T...A    | ..A....     | .....       | ..T..GT..C...   | .....           | ..GA.G...     | .....      | ..G.      |
| EU306352 taxid=293578;  | ..G..T...A    | ..A....     | .....       | ..T..GT..C...   | .....           | ..G....       | .....      | ..G.      |
| FJ969113 taxid=312543;  | ..G..T...A    | ..A....     | .....       | ..T..GT..T...   | .....           | ..G..G...     | .....      | ..G.      |
| AY284591.1 Filenchus th | ..G..T...A    | ..A....     | .....       | ..T..GT..T...   | .....           | ..G..G...     | .....      | ..G.      |
| AY284591.1 Tylenchus na | ..G..T...A    | ..A....     | .....       | ..T..GT..T...   | .....           | ..G..G...     | .....      | ..G.      |
| KJ869373.1 Tylenchus na | T....T...A    | ..A....     | .....       | ..T.GTT..AC.C   | .....           | ..A..A...     | .....      | .....     |
| AY284812 taxid=288453;  | TA....T...A   | .....       | .....       | ..T.GTT..AC.C   | .....           | ..A..A...     | .....      | .....     |
| AY284809.1 Paraxonchium | T....T...A    | .....       | .....       | ..T.GTT..AC.C   | .....           | ..A..A...     | .....      | ..C...    |
| EF207248.1 Mesodorylaim | ..T...T...A   | .....       | .....       | ..T.TT...C...   | .....           | .....         | .....      | .....     |
| AJ966513.1 Wilsonema sc | ..A....T...A  | .....       | .....       | ..T.GTT..AC.C   | .....           | ..A..A...     | .....      | .....     |
| JX445118 taxid=1309579; | T....T...A    | .....       | .....       | ..T.CG.T..AC.C  | .....           | ..A..A...     | .....      | .....     |
| EF207249.1 Xiphinema in | TA....T...A   | .....       | .....       | ..T.GTT..AC.C   | .....           | ..A..A...     | .....      | .....     |
| AJ966472 taxid=344372;  | ..T...T...A   | .....       | .....       | ..T.GTT..AC.C   | .....           | ..A..A...     | .....      | .....     |
| AY284807 taxid=288432;  | T.C...T...A   | .....       | .....       | ..T.GTT..AC.C   | .....           | ..A..A...     | .....      | .....     |
| EF207253 taxid=288458;  | ..T...T...A   | ..A....     | .....       | ..T.GTT..A..C   | .....           | ..A..A...     | .....      | .....     |
| KF583882.1 Mermis nigre | ..T...T...A   | ..A....     | .....       | ..T.GTT..A..C   | .....           | ..A..A...     | .....      | .....     |
| CAQ801000365 taxid=1365 | ..T...T...A   | ..A....     | .....       | ..T.GTT..A..C   | .....           | ..A..A...     | .....      | .....     |
| AJ966474 taxid=288489;  | ..T...T...A   | ..A....     | .....       | ..T.GTT..A..C   | .....           | ..A..A...     | .....      | .....     |
| AY552973 taxid=268226;  | ..TA...A..A   | .....       | .....       | ..T.GTT..AC.C   | .....           | ..GA.A...     | .....      | .....     |
| AB361437 taxid=293883;  | ..T...T...A   | ..A....     | .....       | ..T.GTT..AC.C   | .....           | ..GA.A...     | .....      | .....     |
| AF036603 taxid=70239;   | ..T...T...A   | ..A....     | ..A....     | ..T.TT.CAC      | ..C...          | ..A....       | .....      | .....     |
| FJ969141.1 Stenonchulus | ..T...T...A   | ..A....     | .....       | ..T.TG.CAC      | .....           | ..A....       | .....      | .....     |





|                         | 490        | 500     | 510                             | 520       | 530                 | 540  | 550    | 560          |
|-------------------------|------------|---------|---------------------------------|-----------|---------------------|------|--------|--------------|
| LC107877 taxid=539210;  | CTCAATTC   | GAGGAGG | TAGTAACTATCAATAACGAGACAGATCTCTA | TGAGGCCTG | TATCGGAATGGGTACAATT |      |        |              |
| LC095813 taxid=1752120; | ...G       | ...     | ...                             | ...       | ...                 | ...  | ...    | ...          |
| KC206040 taxid=446301;  | ...GGCA    | ...     | ...                             | ...       | ...                 | ...  | ...    | ...          |
| 18S-Pa_Plectus_acuminat | ...        | ...     | ...                             | ...       | ...                 | ...  | ...    | ...          |
| KU180671 taxid=293684;  | ...GCA     | ...     | ...                             | ...       | ...                 | ...  | ...    | ...          |
| 18S-An_Acrobeloides_nan | ...        | ...     | ...                             | ...       | ...                 | ...  | ...    | ...          |
| EU082999.1 Acrobeloides | ...GCA     | ...     | ...                             | ...       | ...                 | ...  | ...    | ...          |
| 18S-C Cephalobus_sp     | ...        | ...     | ...                             | ...       | ...                 | ...  | ...    | ...          |
| AF202152.1 Cervidellus  | ...GCA     | ...     | ...                             | ...       | ...                 | ...  | ...    | ...          |
| AY284668.1 Heterocephal | ...GCA     | ...     | ...                             | ...       | ...                 | ...  | ...    | ...          |
| 18S-Hb_Heterorhabditis  | ...        | ...     | ...                             | ...       | ...                 | ...  | ...    | ...          |
| AF202156.2 Halicephalob | ...G.G     | ...     | ...                             | ...       | ...                 | ...  | ...    | ...          |
| KC522707.1 Panagrolaimu | ...G       | ...     | ...                             | ...       | ...                 | ...  | ...    | ...          |
| AY268117.1 Caenorhabdit | G.TG.G     | T.A     | G.AA                            | TAA       | T-CATC              | T.TG | ATGA   | TTC.A.TG.AC  |
| AF082999.2 Distolabrell | ...        | ...     | ...                             | ...       | ...                 | ...  | ...    | ...          |
| 18S-Rb_Mesorhabditis_be | ...        | ...     | ...                             | ...       | ...                 | ...  | ...    | ...          |
| 18S-Ot_Oscheius-tipulae | AC         | AGT.A   | G.AA                            | AA.T.CA   | CT                  | AACG | AT.G.A | TTC.AA.TG.GC |
| AF083015.1 Teratorhabdi | ...        | ...     | ...                             | ...       | ...                 | ...  | ...    | ...          |
| 18S-Sf_Steinernema_felt | ...        | ...     | ...                             | ...       | ...                 | ...  | ...    | ...          |
| AY284686.1 Metateratoce | ...A       | ...     | ...                             | ...       | ...                 | ...  | ...    | ...          |
| AY284683.1 Teratocephal | ...G.A     | ...     | ...                             | ...       | ...                 | ...  | ...    | ...          |
| 18S-Dd_Ditylenchus_dips | ...        | ...     | ...                             | ...       | ...                 | ...  | ...    | ...          |
| AB368535 taxid=400731;  | GC.G.AA    | GT      | G.G.GA                          | ...       | ...                 | ...  | ...    | ...          |
| 18S-Bx_Bursaphelenchus  | ...        | ...     | ...                             | ...       | ...                 | ...  | ...    | ...          |
| AB368532 taxid=483518;  | G.AAG      | C       | G.G.GA                          | A         | C.T                 | T    | T.G.C  | T.A.CC       |
| 18S-Cr_Mesocriconema_sp | ...        | ...     | ...                             | ...       | ...                 | ...  | ...    | ...          |
| KJ934161 taxid=1542464; | ...GG      | TCG     | G.G.AA                          | A.G.T.T   | TAC                 | A.CC | T      | CAC          |
| EF025336 taxid=411803;  | ...CA      | GCG     | G.G.GA                          | A.G.C.T   | CTAA                | G.CC | T      | ...          |
| JQ771537.1 Neodolichodo | ...A       | GCG     | G.G.GA                          | C.T       | A.A                 | G.C  | ...    | ...          |
| JQ446376.1 Hemicaloosia | ...GG      | TCG     | G.G.AA                          | A.GAC.T   | TA                  | GTCC | T      | C.C          |
| EU306341.1 Hemicyclophi | ...GG      | TCG     | G.G.AA                          | A.G.C.T   | TA                  | G.CC | T      | CAC          |
| KJ869397.1 Helicotylenc | ...C       | GCG     | G.G.GA                          | A.C.T     | CTAC                | G    | T      | ...          |
| AY284609.1 Rotylenchus  | ...G       | TCG     | G.G.GA                          | C.T       | ACAA                | G.C  | ...    | CAC          |
| 18S-Mi_Meloidogyne_inco | ...        | ...     | ...                             | ...       | ...                 | ...  | ...    | ...          |
| EU306351 taxid=364564;  | ...GAAT    | ...     | ...                             | ...       | ...                 | ...  | ...    | ...          |
| EU306350.1 Nagelus_obsc | ...GAAT    | ...     | ...                             | ...       | ...                 | ...  | ...    | ...          |
| KP966493.1 Paratylenchu | ...GG      | TCG     | G.G.AA                          | A.G.C.T   | TT                  | G.CC | T      | C            |
| 18S-Par_Pratylenchus_s  | ...        | ...     | ...                             | ...       | ...                 | ...  | ...    | ...          |
| EF029855 taxid=406317;  | ...GAA     | GCG     | G.G.GA                          | T.T       | TCA                 | A.C  | ...    | ...          |
| 18S-Pp_Pratylenchus_pen | ...        | ...     | ...                             | ...       | ...                 | ...  | ...    | ...          |
| JQ957898.1 Deladenus_du | ...GGAA    | G       | G.G.GA                          | C.T       | T                   | G    | T      | C            |
| AB250212.1 Sphaerularia | ...GAA     | ...     | ...                             | ...       | ...                 | ...  | ...    | CC           |
| FJ969144.1 Trophurus_im | ...GAATGCG | ...     | ...                             | ...       | ...                 | ...  | ...    | ...          |
| EU306352 taxid=293578;  | ...G.A.G   | ...     | ...                             | ...       | ...                 | ...  | ...    | ...          |
| FJ969113 taxid=312543;  | ...GAA     | ...     | ...                             | ...       | ...                 | ...  | ...    | C            |
| AY284591.1 Filenchus_th | ...GAA.ATT | ...     | ...                             | ...       | ...                 | ...  | ...    | C            |
| KJ869373.1 Tylenchus_na | ...GAA.ATT | ...     | ...                             | ...       | ...                 | ...  | ...    | C            |
| AY284812 taxid=288453;  | TC.GAA     | GA      | G.G.AA                          | TC        | T-C                 | T    | C      | ...          |
| AY284809.1 Paraxonchium | TC.GAA     | GA      | G.G.AA                          | TC        | T-C                 | T    | C      | ...          |
| EF207248.1 Mesodorylaim | TC.GAA     | GA      | G.G.AA                          | TC        | T-C                 | T    | C      | ...          |
| AJ966513.1 Wilsonema_sc | ...GGCA    | ...     | ...                             | ...       | ...                 | ...  | ...    | A            |
| JX445118 taxid=1309579; | TC.GAA     | GA      | G.G.AA                          | TC        | C                   | T    | C      | ...          |
| EF207249.1 Xiphinema_in | TC.GAA     | GA      | G.G.AA                          | TC        | T-C                 | T    | C      | ...          |
| AJ966472 taxid=344372;  | TC.GAA     | GA      | G.G.AA                          | TC        | T-C                 | T    | C      | ...          |
| AY284807 taxid=288432;  | TC.GAA     | GA      | G.G.AA                          | TC        | T-C                 | T    | C      | ...          |
| EF207253 taxid=288458;  | TC.GAA     | GA      | G.G.AA                          | TC        | T-C                 | T    | C      | ...          |
| KF583882.1 Mermis_nigre | C.G.A      | G       | G.G.AA                          | T         | TC.A                | T    | T      | C            |
| CAQ801000365 taxid=1365 | C.GG.A     | G       | G.G.AA                          | TC.A      | T                   | T    | C      | ...          |
| AJ966474 taxid=288489;  | C.GAA      | G       | G.G.AA                          | TC.A      | T                   | T    | C      | ...          |
| AY552973 taxid=268226;  | C.GAA      | G       | G.G.AA                          | TC.A      | T                   | T    | C      | ...          |
| AB361437 taxid=293883;  | ...GAA     | ...     | ...                             | ...       | ...                 | ...  | ...    | ...          |
| AF036603 taxid=70239;   | C.GGCA     | G       | G.G.AA                          | G.G.T     | C                   | C    | CC     | ...          |
| FJ969141.1 Stenonchulus | A.GCAA     | T       | G.G.AA                          | G.G.T     | T                   | CACC | ...    | ...          |

|                          | 570                                                                              | 580     | 590    | 600 | 610 | 620 | 630   | 640    |
|--------------------------|----------------------------------------------------------------------------------|---------|--------|-----|-----|-----|-------|--------|
| LC107877 taxid=539210;   | AAACCCCTTTAACGAGGATCTATGAGAGGGCAAGTCTGGTGCCAGCAGCCGCGGTAATTCAGCTCTCAAGGTGTATATCG |         |        |     |     |     |       |        |
| LC095813 taxid=1752120;  |                                                                                  |         |        |     |     |     | T     |        |
| KC206040 taxid=446301;   |                                                                                  | C       |        |     |     |     |       |        |
| 18S-Pa_Plectus acuminat  |                                                                                  |         |        |     |     |     |       |        |
| KU180671 taxid=293684;   |                                                                                  | T       |        |     |     |     | A     | C GAA  |
| 18S-An_Acrobeloides nan  |                                                                                  |         |        |     |     |     | A     | C GAA  |
| EU306344.1 Acrobeloides  |                                                                                  | T       |        |     |     |     | A     | C GAA  |
| 18S-C_Cephalobus_sp      |                                                                                  |         |        |     |     |     | A     | C GAA  |
| AF202152.1 Cervidellus   |                                                                                  | T       |        |     |     |     | A     | C GAA  |
| AY284668.1 Heterocephal  |                                                                                  | T       |        |     |     |     | A     | C GAA  |
| 18S-Hb_Heterorhabditis   |                                                                                  |         |        |     |     | CAC | A     | A      |
| AF202156.2 Halicephalob  | TT A                                                                             | A TT    | A      |     |     |     | TAC   | C TGAA |
| KC522707.1 Panagrolaimu  | AT A                                                                             | A T     | A      |     |     |     | TAC   | C TGAA |
| AY268117.1 Caenorhabdit  | TGA CTT                                                                          | T G A G |        |     |     | CTA |       | C      |
| AF082999.2 Distolabrell  |                                                                                  |         |        |     |     |     | A     | G A    |
| 18S-Rb_Mesorhabditis be  |                                                                                  |         |        |     |     |     | A     | G A    |
| 18S-Ot_Oscheius-tipulae  | TAGC CT T                                                                        | C       | ATG    |     |     |     | CATTA | C      |
| AF083015.1 Teratorhabdi  |                                                                                  |         |        |     |     |     | A     | G A    |
| 18S-Sf_Steinernema felt  |                                                                                  |         |        |     |     |     | AA    | CT AA  |
| AY284686.1 Metateratoce  |                                                                                  | C       |        |     |     |     |       |        |
| AY284683.1 Teratocephal  |                                                                                  |         |        |     |     |     |       |        |
| 18S-Dd_Ditylenchus dips  |                                                                                  |         |        |     |     |     | AA    | C GAA  |
| AB368535 taxid=400731;   | G AT                                                                             | T       | C      |     |     |     | GTAAG | GAA    |
| 18S-Bx_Bursaphelenchus   |                                                                                  |         |        |     |     |     | GTAAG | GAA    |
| AB368532 taxid=483518;   | G A                                                                              | T       | C      |     |     |     | GTAAG | GAA    |
| 18S-Cr_Mesocriconeuma sp |                                                                                  |         |        |     |     |     | AA    | C GAA  |
| KJ934161 taxid=1542464;  |                                                                                  | T       | A      |     |     |     | AA    | C GAA  |
| EF025336 taxid=411803;   | G                                                                                | T       | A      |     |     |     | AA    | C GAA  |
| JQ771537.1 Neodolichodo  |                                                                                  | T       | A      |     |     |     | AA    | C GAA  |
| JQ446376.1 Hemicaloosia  |                                                                                  | T       | A      |     |     |     | AA    | C GAA  |
| EU306341.1 Hemicyclioph  |                                                                                  | T       | A      |     |     |     | AA    | C GAA  |
| KJ869397.1 Helicotylenc  |                                                                                  | T       |        |     |     |     | AA    | C GAA  |
| AY284609.1 Rotylenchus   |                                                                                  | T       |        |     |     |     | AA    | C GAA  |
| 18S-Mi_Meloidogyne inco  |                                                                                  |         |        |     |     | GC  | AA AC | GAA    |
| EU306351 taxid=364564;   |                                                                                  | T       |        |     |     |     | AA    | C GAA  |
| EU306350.1 Nagelus obsc  |                                                                                  | T       |        |     |     |     | AA    | C GAA  |
| KP966493.1 Paratylenchu  |                                                                                  | T       | A      |     |     |     | AA    | C GAA  |
| 18S-Par_Pratylenchus_s   |                                                                                  |         |        |     |     |     | AA    | C GAA  |
| EF029855 taxid=406317;   |                                                                                  | T       |        |     |     |     | AA    | C GAA  |
| 18S-Pp_Pratylenchus pen  |                                                                                  |         |        |     |     |     | AA    | C GAA  |
| JQ957898.1 Deladenus du  |                                                                                  | T       |        |     |     |     | AA    | C GAA  |
| AB250212.1 Sphaerularia  |                                                                                  | T       |        |     |     |     | AA    | C GAA  |
| FJ969144.1 Trophurus im  |                                                                                  | T       |        | C   |     |     | AA    | C GAA  |
| EU306352 taxid=293578;   |                                                                                  | T       |        |     |     |     | AA    | C GAA  |
| FJ969113 taxid=312543;   |                                                                                  | T       |        |     |     |     | AA    | C GAA  |
| AY284591.1 Filenchus th  |                                                                                  | T       |        | G   |     |     | AA    | C GAA  |
| KJ869373.1 Tylenchus na  |                                                                                  | T       |        |     |     |     | AA    | C GAA  |
| AY284812 taxid=288453;   | T                                                                                |         | TG     |     |     | CA  | TA C  | TA     |
| AY284809.1 Paraxonchium  | A GA                                                                             |         | TG     |     |     | CA  | TA C  | TA     |
| EF207248.1 Mesodorylaim  | T                                                                                |         | TG     |     |     | CA  | TA C  | TA     |
| AJ966513.1 Wilsonema sc  |                                                                                  | C       |        |     |     |     |       |        |
| JX445118 taxid=1309579;  | T                                                                                |         | TG     |     |     | CA  | TA C  | TA     |
| EF207249.1 Xiphinema in  | T                                                                                |         | TG     |     |     | CA  | TA C  | TA     |
| AJ966472 taxid=344372;   | T                                                                                |         | TG     |     |     | CA  | TA C  | TA     |
| AY284807 taxid=288432;   | T                                                                                |         | TG     |     |     | CA  | TA C  | TA     |
| EF207253 taxid=288458;   | T                                                                                |         | TG     |     |     | CA  | TA C  | TA     |
| KF583882.1 Mermis nigre  | T                                                                                |         | T      |     |     | A   | TA C  | TA     |
| CAQS01000365 taxid=1365  | T                                                                                |         | C T    |     |     | A   | TA C  | TA     |
| AJ966474 taxid=288489;   | AA                                                                               |         | T      |     |     | A   | TA C  | TA     |
| AY552973 taxid=268226;   | TA                                                                               |         | A C TG |     |     | A   | TA C  | TA     |
| AB361437 taxid=293883;   | T T                                                                              |         | T      |     |     | A   | TA C  | TA     |
| AF036603 taxid=70239;    | T                                                                                |         | TA TG  |     |     | CA  | TA C  | TA     |
| FJ969141.1 Stenonchulus  | GT                                                                               | G       | A TG   |     | T   | CA  | TA C  | TA     |



|                          | 650                                                                                       | 660                                                                           | 670 | 680 | 690 | 700 | 710 | 720 |  |
|--------------------------|-------------------------------------------------------------------------------------------|-------------------------------------------------------------------------------|-----|-----|-----|-----|-----|-----|--|
| LC107877 taxid=539210;   | .... .... .... .... .... .... .... .... .... .... .... .... .... .... ....                | -TCATTGCTGCGGTAAAAAGCTCGTAGTTGGATCTGAGTT-TG-TGAACGAGGTG-CACCAG--CGGTGT--AACTT |     |     |     |     |     |     |  |
| LC095813 taxid=1752120;  | ..... ..... ..... ..... ..... ..... ..... ..... ..... ..... ..... ..... ..... ..... ..... | .....AC-G..C.G.G.T...-T.T---TC.A...-...G                                      |     |     |     |     |     |     |  |
| KC206040 taxid=446301;   | ..... ..... ..... ..... ..... ..... ..... ..... ..... ..... ..... ..... ..... ..... ..... | .....C.CC-T-C.G..TC..C..G..CA--AC.G..GTG...G                                  |     |     |     |     |     |     |  |
| 18S-Pa_Plectus_acuminat  | ..... ..... ..... ..... ..... ..... ..... ..... ..... ..... ..... ..... ..... ..... ..... | .....C.CC-T-C.G..TC..C..G..CA--AC.G..GTG...G                                  |     |     |     |     |     |     |  |
| KU180671 taxid=293684;   | ..... ..... ..... ..... ..... ..... ..... ..... ..... ..... ..... ..... ..... ..... ..... | .....T.CC-AT-A.G..TG..C...TTT-C--G..GCGT...C                                  |     |     |     |     |     |     |  |
| 18S-An_Acrobelloides_nan | ..... ..... ..... ..... ..... ..... ..... ..... ..... ..... ..... ..... ..... ..... ..... | .....T.CC-AT-A.G..T...C...TT-C--G..GCGT...A                                   |     |     |     |     |     |     |  |
| EU306344.1 Acrobelloides | ..... ..... ..... ..... ..... ..... ..... ..... ..... ..... ..... ..... ..... ..... ..... | .....T.CC-AT-A.G..G...C-T...TT-C--G..ACGT...C                                 |     |     |     |     |     |     |  |
| 18S-C_Cephalobus_sp      | ..... ..... ..... ..... ..... ..... ..... ..... ..... ..... ..... ..... ..... ..... ..... | .....T.CC-AT-A.G..T...C...TT-C--G..GCGT...A                                   |     |     |     |     |     |     |  |
| AF202152.1 Cervidellus   | ..... ..... ..... ..... ..... ..... ..... ..... ..... ..... ..... ..... ..... ..... ..... | .....T.CC-AT-A.G..TG..C...TT-C--G..GCGT...C                                   |     |     |     |     |     |     |  |
| AY284668.1 Heterocephal  | ..... ..... ..... ..... ..... ..... ..... ..... ..... ..... ..... ..... ..... ..... ..... | .....T.CC-TAT-.G..G...C...TT-CT-.G..GCGT...C                                  |     |     |     |     |     |     |  |
| 18S-Hb_Heterorhabditis   | ..... ..... ..... ..... ..... ..... ..... ..... ..... ..... ..... ..... ..... ..... ..... | .....T...AC-.ACTTT-.A.T..G...TT-T...C..TAATCA..                               |     |     |     |     |     |     |  |
| AF202156.2 Halicephalob  | ..... ..... ..... ..... ..... ..... ..... ..... ..... ..... ..... ..... ..... ..... ..... | .....TGC..T.....T.....C.AG..--T...G..ATAGNGGTT--G--T.A                        |     |     |     |     |     |     |  |
| KC522707.1 Panagrolaimu  | ..... ..... ..... ..... ..... ..... ..... ..... ..... ..... ..... ..... ..... ..... ..... | .....TG...T.....TACATGA-.AGGTTT.T.CATC.TTT---.GA.TGT...AA                     |     |     |     |     |     |     |  |
| AY268117.1 Caenorhabdit  | ..... ..... ..... ..... ..... ..... ..... ..... ..... ..... ..... ..... ..... ..... ..... | .....T.....AG...AC...CCTC..A.T..G.A.T--TT.C..CAACTGGG                         |     |     |     |     |     |     |  |
| AF082999.2 Distolabrell  | ..... ..... ..... ..... ..... ..... ..... ..... ..... ..... ..... ..... ..... ..... ..... | .....T.....CC.C...G.TACA.T...T--T...GAT.CTG.                                  |     |     |     |     |     |     |  |
| 18S-Rb_Mesorhabditis_be  | ..... ..... ..... ..... ..... ..... ..... ..... ..... ..... ..... ..... ..... ..... ..... | .....T.....CC.T...G.TAC..T...T--T...GAT.CTGG                                  |     |     |     |     |     |     |  |
| 18S-Ot_Oscheius-tipulae  | ..... ..... ..... ..... ..... ..... ..... ..... ..... ..... ..... ..... ..... ..... ..... | .....AT.....T.....G...GCA--TG..TT.ATA.T..TT---.GGAGGT.A                       |     |     |     |     |     |     |  |
| AF083015.1 Teratorhabdi  | ..... ..... ..... ..... ..... ..... ..... ..... ..... ..... ..... ..... ..... ..... ..... | .....T.....C..C...TCCA..C...T--T...GGT.CTGG                                   |     |     |     |     |     |     |  |
| 18S-Sf_Steinernema_felt  | ..... ..... ..... ..... ..... ..... ..... ..... ..... ..... ..... ..... ..... ..... ..... | .....C.....T.....CT.CAAC..C...GT...T..GTTCA--TT.AACGATT...                    |     |     |     |     |     |     |  |
| AY284686.1 Metateratoce  | ..... ..... ..... ..... ..... ..... ..... ..... ..... ..... ..... ..... ..... ..... ..... | .....C.....C.CC-T-A.G..TC..C..T..CA--T.G.AGCG...G                             |     |     |     |     |     |     |  |
| AY284683.1 Teratocephal  | ..... ..... ..... ..... ..... ..... ..... ..... ..... ..... ..... ..... ..... ..... ..... | .....C.....CA.AGC.CC-A.G..CT..C...CA--T.G..GAG...G                            |     |     |     |     |     |     |  |
| 18S-Dd_Ditylenchus_dips  | ..... ..... ..... ..... ..... ..... ..... ..... ..... ..... ..... ..... ..... ..... ..... | .....T.....T.C..GA--G..CT..C...TT-C--G..GCGT...A                              |     |     |     |     |     |     |  |
| AB368535 taxid=400731;   | ..... ..... ..... ..... ..... ..... ..... ..... ..... ..... ..... ..... ..... ..... ..... | .....T.....T...A...T.....TGTT.AA-C...GCTCG--TC...C..T..TG..GCGT...C           |     |     |     |     |     |     |  |
| 18S-Bx_Bursaphelenchus   | ..... ..... ..... ..... ..... ..... ..... ..... ..... ..... ..... ..... ..... ..... ..... | .....T.....T...A...T.....TGC.ACG-C.A.GTATG--TC...C..T.T.G..GCGT...C           |     |     |     |     |     |     |  |
| AB368532 taxid=483518;   | ..... ..... ..... ..... ..... ..... ..... ..... ..... ..... ..... ..... ..... ..... ..... | .....T.....T.....T.....GGTTA.G-T...CGCG.GTC...GT-TTTCG..TGGT...C              |     |     |     |     |     |     |  |
| 18S-Cr_Mesocriconeuma_sp | ..... ..... ..... ..... ..... ..... ..... ..... ..... ..... ..... ..... ..... ..... ..... | .....C.....T.CC--GCGT...T...C..T..TT-AACAG..G-GT...G                          |     |     |     |     |     |     |  |
| KJ934161 taxid=1542464;  | ..... ..... ..... ..... ..... ..... ..... ..... ..... ..... ..... ..... ..... ..... ..... | .....C.....TCCC--GCG...T...C...CT-AAC.G.G-GT...G                              |     |     |     |     |     |     |  |
| EF025336 taxid=411803;   | ..... ..... ..... ..... ..... ..... ..... ..... ..... ..... ..... ..... ..... ..... ..... | .....C.....T...A-C-GCGCG.C...C...T.TT-CG--A.GTGC...G                          |     |     |     |     |     |     |  |
| JQ771537.1 Neodolichodo  | ..... ..... ..... ..... ..... ..... ..... ..... ..... ..... ..... ..... ..... ..... ..... | .....T.C...-GCC.GCC..C...CA-CT..G..GCGC...G                                   |     |     |     |     |     |     |  |
| JQ446376.1 Hemicaloosia  | ..... ..... ..... ..... ..... ..... ..... ..... ..... ..... ..... ..... ..... ..... ..... | .....C.....T.CC--GCTC..T...C...CT-AAC.G.GG-GC...G                             |     |     |     |     |     |     |  |
| EU306341.1 Hemicyclioph  | ..... ..... ..... ..... ..... ..... ..... ..... ..... ..... ..... ..... ..... ..... ..... | .....C.....T.CC--GCGC..T...C...CT-GAC.G.CG-GT...G                             |     |     |     |     |     |     |  |
| KJ869397.1 Helicotylenc  | ..... ..... ..... ..... ..... ..... ..... ..... ..... ..... ..... ..... ..... ..... ..... | .....T.....T.CC--ACT.GCC..C...TTCT-TT..GA.GCGC...G                            |     |     |     |     |     |     |  |
| AY284609.1 Rotylenchus   | ..... ..... ..... ..... ..... ..... ..... ..... ..... ..... ..... ..... ..... ..... ..... | .....T.....T.C...-GTCG.CG..C...CT-CT.CG..GCGC...G                             |     |     |     |     |     |     |  |
| 18S-Mi_Meloidogyne_inco  | ..... ..... ..... ..... ..... ..... ..... ..... ..... ..... ..... ..... ..... ..... ..... | .....T.....G.....A...TC.TA.C--AT.C.TT.AA-C-CT-T...G..GTCT...A                 |     |     |     |     |     |     |  |
| EU306351 taxid=364564;   | ..... ..... ..... ..... ..... ..... ..... ..... ..... ..... ..... ..... ..... ..... ..... | .....T.....T.....T.CC-G...G..CC..C...TC--AAA.G..GCGT...G                      |     |     |     |     |     |     |  |
| EU306350.1 Nagelus_obsc  | ..... ..... ..... ..... ..... ..... ..... ..... ..... ..... ..... ..... ..... ..... ..... | .....T.....T.CC.GA...G..CC..C...TC--CAA.G..GCGC...G                           |     |     |     |     |     |     |  |
| KP966493.1 Paratylenchu  | ..... ..... ..... ..... ..... ..... ..... ..... ..... ..... ..... ..... ..... ..... ..... | .....C.....T.CC--ACG...T...C..G..TT-AACCG.CG-GT...G                           |     |     |     |     |     |     |  |
| 18S-Par_Pratylenchus_s   | ..... ..... ..... ..... ..... ..... ..... ..... ..... ..... ..... ..... ..... ..... ..... | .....C.....T.CC--GCG...T...C..G..CT-AACCG.CG-GT...G                           |     |     |     |     |     |     |  |
| EF029855 taxid=406317;   | ..... ..... ..... ..... ..... ..... ..... ..... ..... ..... ..... ..... ..... ..... ..... | .....T.....T.C...-ACGTGCT..C...CT-T...G..GTGT...G                             |     |     |     |     |     |     |  |
| 18S-Pp_Pratylenchus_pen  | ..... ..... ..... ..... ..... ..... ..... ..... ..... ..... ..... ..... ..... ..... ..... | A.T.....CAGC-C.G..GCC.GT-.CATCT-T...G..GTGT...G                               |     |     |     |     |     |     |  |
| JQ957898.1 Deladenus_du  | ..... ..... ..... ..... ..... ..... ..... ..... ..... ..... ..... ..... ..... ..... ..... | .....C.....A...AT.CC-T.AGG.TT..C...TTTGATTAA..GCGT...A                        |     |     |     |     |     |     |  |
| AB250212.1 Sphaerularia  | ..... ..... ..... ..... ..... ..... ..... ..... ..... ..... ..... ..... ..... ..... ..... | .....T.....G..T.CC-C...G..TT..C...TT-TT.AG..TGGC...A                          |     |     |     |     |     |     |  |
| FJ969144.1 Trophurus_im  | ..... ..... ..... ..... ..... ..... ..... ..... ..... ..... ..... ..... ..... ..... ..... | .....T.....T.CC-A-GCGT.CT..C...TT-T...G..GCGC...G                             |     |     |     |     |     |     |  |
| EU306352 taxid=293578;   | ..... ..... ..... ..... ..... ..... ..... ..... ..... ..... ..... ..... ..... ..... ..... | .....T.....T.C...-GCC.T.CC..C...CT...G..GCGC...G                              |     |     |     |     |     |     |  |
| FJ969113 taxid=312543;   | ..... ..... ..... ..... ..... ..... ..... ..... ..... ..... ..... ..... ..... ..... ..... | .....T.....T.CC-A...G.GTC..C...TTT-C...A..G-GT...G                            |     |     |     |     |     |     |  |
| AY284591.1 Filenchus_th  | ..... ..... ..... ..... ..... ..... ..... ..... ..... ..... ..... ..... ..... ..... ..... | .....T.....T.CC-A...G.GTC..C...ACT-T...GCGC...G                               |     |     |     |     |     |     |  |
| KJ869373.1 Tylenchus_na  | ..... ..... ..... ..... ..... ..... ..... ..... ..... ..... ..... ..... ..... ..... ..... | .....T.....T.CC-A...G.GTC..CGT..TTT-C...A..GCGT...G                           |     |     |     |     |     |     |  |
| AY284812 taxid=288453;   | ..... ..... ..... ..... ..... ..... ..... ..... ..... ..... ..... ..... ..... ..... ..... | -AAG...T.....C.....C.GCC.C-G..GAAC..CC.C.G.A--A.G..GGTC...G                   |     |     |     |     |     |     |  |
| AY284809.1 Paraxonchium  | ..... ..... ..... ..... ..... ..... ..... ..... ..... ..... ..... ..... ..... ..... ..... | -AAG...T.....C.....C.GCC.T-G..GGAC..CC.C.G.A--A.G..CGGTC...G                  |     |     |     |     |     |     |  |
| EF207248.1 Mesodorylaim  | ..... ..... ..... ..... ..... ..... ..... ..... ..... ..... ..... ..... ..... ..... ..... | -AAG...T.....C.....C.GCC.C-G..GAAC..CC.C.G.A--A.G..CGGTC...G                  |     |     |     |     |     |     |  |
| AJ966513.1 Wilsonema_sc  | ..... ..... ..... ..... ..... ..... ..... ..... ..... ..... ..... ..... ..... ..... ..... | -C.....T.....C.CC-T-C.G..TC..C..G..CA--AC.G..GTG...G                          |     |     |     |     |     |     |  |
| JX445118 taxid=1309579;  | ..... ..... ..... ..... ..... ..... ..... ..... ..... ..... ..... ..... ..... ..... ..... | -AAG...T.....C.....A...C.GCT.T-G..GAAC..ACC.C.G.A--A.G..GGT...G               |     |     |     |     |     |     |  |
| EF207249.1 Xiphinema_in  | ..... ..... ..... ..... ..... ..... ..... ..... ..... ..... ..... ..... ..... ..... ..... | -AAG...T.....C.....C.G.T.TCG..GAAC..CC.C.G.A--A.G..CGGTC...G                  |     |     |     |     |     |     |  |
| AJ966472 taxid=344372;   | ..... ..... ..... ..... ..... ..... ..... ..... ..... ..... ..... ..... ..... ..... ..... | -AAG...T.....C.....C.GCC.C-GA.GGAC..CT.C.G.A--A.G..AGTC...G                   |     |     |     |     |     |     |  |
| AY284807 taxid=288432;   | ..... ..... ..... ..... ..... ..... ..... ..... ..... ..... ..... ..... ..... ..... ..... | -AAG...T.....C.....C.GCC.C-G..GAAC..CC.C.G.A--A.G..CGGTC...G                  |     |     |     |     |     |     |  |
| EF207253 taxid=288458;   | ..... ..... ..... ..... ..... ..... ..... ..... ..... ..... ..... ..... ..... ..... ..... | -AAG...T.....C.....C.GCCG-C..GAAC..CC.C.G.A--A.G..GGTC...G                    |     |     |     |     |     |     |  |
| KF583882.1 Mermis_nigre  | ..... ..... ..... ..... ..... ..... ..... ..... ..... ..... ..... ..... ..... ..... ..... | -AAG...T..T.....C..C...AT.T.TC.ACTGT-GA.GGTCA..AG.CTGTA--T.G..T-TC...G        |     |     |     |     |     |     |  |
| CAQ801000365 taxid=1365  | ..... ..... ..... ..... ..... ..... ..... ..... ..... ..... ..... ..... ..... ..... ..... | -AAG...T..T.....C..C...AT.T.TC.GCG.T-G...GAC...AG.C.G.A--A.G..C-T...G         |     |     |     |     |     |     |  |
| AJ966474 taxid=288489;   | ..... ..... ..... ..... ..... ..... ..... ..... ..... ..... ..... ..... ..... ..... ..... | -AAG...T..T.....C..C...TC.G.C.T-GA.G.TC..AG.T.GTA--A.G..T-T...G               |     |     |     |     |     |     |  |
| AY552973 taxid=268226;   | ..... ..... ..... ..... ..... ..... ..... ..... ..... ..... ..... ..... ..... ..... ..... | -AAG...T..T.....C..C...TC.G.C.T-GA.G.TC..AG.C.GTA--A.G..T-T...G               |     |     |     |     |     |     |  |
| AB361437 taxid=293883;   | ..... ..... ..... ..... ..... ..... ..... ..... ..... ..... ..... ..... ..... ..... ..... | -AAG...T..T.....C..C...T.T.TC.G.C.C-GA.G.TC..AG.T.GTA--T.G..CT-T...G          |     |     |     |     |     |     |  |
| AF036603 taxid=70239;    | ..... ..... ..... ..... ..... ..... ..... ..... ..... ..... ..... ..... ..... ..... ..... | -AAG...T.....C.GCCGA-G..GG..C...CC.C.GT--T.G..GGCT...G                        |     |     |     |     |     |     |  |
| FJ969141.1 Stenonchulus  | ..... ..... ..... ..... ..... ..... ..... ..... ..... ..... ..... ..... ..... ..... ..... | -AAG...T..T.....AC.GCCGA-G..TT..C...CC.C.GC--T.G..GGTT...G                    |     |     |     |     |     |     |  |

|                           | 730                                               | 740       | 750                 | 760 | 770            | 780                | 790         | 800                 |
|---------------------------|---------------------------------------------------|-----------|---------------------|-----|----------------|--------------------|-------------|---------------------|
| LC107877 taxid=539210;    | .... .... .... .... .... .... .... .... .... .... | TGCTTCCGA | ACTGTTTTGTTGGTTTTCA | --- | GCGGTTTG       | CCTTTATTGGTAGGTCGT | TGTGA       | CTGGCAAG            |
| LC095813 taxid=1752120;   | CCG...GCGT...AA...C.....G                         | ---       | ---                 | --- | A...CG         | ...                | T.C         | GT...GT.            |
| KC206040 taxid=446301;    | G.A.C.AAGG..T.A.AC..C.....C                       | ---       | ---                 | --- | CTT.A.GC       | T....C...GT        | TCTTG       | G...G...A.G..       |
| 18S-Pa_Plectus acuminat   | A.A.C.AAGG..T.A.AC..C.....C                       | ---       | ---                 | --- | CTT.A.GC       | T...Y.C...GT       | TCTTG       | G...G...A.G..       |
| KU180671 taxid=293684;    | A...T.GGCTTT...AC.....C                           | ---       | ---                 | --- | C.TA..A.       | ....C.C...T.C      | CGC         | G...G...T.G..       |
| 18S-An_Acrobelloides nan  | C...T.GGCTTT...C.....C                            | ---       | ---                 | --- | C.TC..A.       | ....C.C...T.C      | CGCG        | G...G...G..         |
| EU306344.1 Acrobelloides  | C...T.GGCTTT...G.C.....C                          | ---       | ---                 | --- | C.TC..A.       | ....C.C...T.C      | CGCG        | G...G...G..         |
| 18S-C_Cephalobus_sp       | C...T.GGCTTT...C.....C                            | ---       | ---                 | --- | C.TC..A.       | ....C.C...T.C      | CGCG        | G...G...G..         |
| AF202152.1 Cervidellus    | A...T.GGCTTT...C.....C                            | ---       | ---                 | --- | C.TA..A.       | ....C.C...T.C      | CGC         | G...G...G..         |
| AY284668.1 Heterocephal   | C...T.GGCTTT...C.....C                            | ---       | ---                 | --- | C.TC..A.       | ....G.....T.C      | CGCG        | G...G...G..         |
| 18S-Hb_Heterorhabditis    | G.TCGTGA-CT-A.....T                               | ---       | ---                 | --- | T              | GTGGCT.C           | CTCC.TCA    | GTG.C...A.G..       |
| AF202156.2 Haliceteralob  | .TT..GAC..TACN.GAAACCC...AAAT                     | ---       | ---                 | --- | GA..A...GT..A  | ---                | TAAAT       | A..T..TA            |
| KC522707.1 Panagrolaimu   | ATAC.AAATGT.TTT.A.AGATT...TT                      | ---       | ---                 | --- | TT...CG.A.TTT  | ---                | AC.TAT      | AATG..              |
| AY268117.1 Caenorhabdit   | G.TCGTGA-CT.CTAA...CC...C.G                       | ---       | ---                 | --- | T              | CC                 | TTAAC       | ..ATT.C.TAA         |
| AF082999.2 Distolabrell   | CATCCTG-GT.A.A...C..C..C                          | ---       | ---                 | --- | ---            | ---                | ---         | C...AG..            |
| 18S-Rb_Mesorhabditis be   | -ATCCGG-GT.A.AA..C..C..C                          | ---       | ---                 | --- | ---            | ---                | ---         | C...AG..            |
| 18S-Ot_Oscheius-tipulae   | .CT.CG.TGCAGCTAAAC..C...A.T                       | ---       | ---                 | --- | G.AGG.G        | TTCG.AC.C          | GTA.C.G     | ..A.G..             |
| AF083015.1 Teratorhabdi   | CAT.CTGA-GT.A.AA..C..C..C.G.C                     | ---       | ---                 | --- | ---            | ---                | ---         | C...AG..            |
| 18S-Sf_Steinernema felt   | CTTCG.GTTG..CTC.....C...TG                        | ---       | ---                 | --- | A.G..          | TTCC.CAC           | AGT.CT..    | C...A.G..           |
| AY284686.1 Heliceteratoce | A.A.C.AAGG..A.A.AC..C.....T                       | ---       | ---                 | --- | CTT.A.GC       | T....CC..GT        | TCTTG       | A...G...A.G..       |
| AY284683.1 Teratocephal   | G...C.G.GG..A.A.AC..C.....C                       | ---       | ---                 | --- | CTTTG.G        | ....C.ACA          | CT.C.TTG    | G...G...G..         |
| 18S-Dd_Ditylenchus dips   | G...ACGGCTTT..C.CC.....C                          | ---       | ---                 | --- | C.TCA..G       | ..T..C..C          | CT.TGGCG    | G...G...TG.T        |
| AB368535 taxid=400731;    | GTT-G.TTGTA.TTTG.C...TT.G.GG                      | ---       | ---                 | --- | C...G          | CGG                | TAGC.T      | CA...TG.GA..G.      |
| 18S-Bx_Bursaphelenchus    | AAT.G.TTGCA.TTTGCA...TT.G.GG                      | ---       | ---                 | --- | C.CG           | CGG                | CGTT        | CA...TG.AT..G.      |
| AB368532 taxid=483518;    | GTTTCGT.TTCGATTG.G...CT.G.G.G                     | ---       | ---                 | --- | TT...C         | T..CGGC            | T.CA        | C...CGC.ACA...      |
| 18S-Cr_Mesocriconema_sp   | C..G.GTCGGCTTTG.G..CC...C..G                      | ---       | ---                 | --- | T.C.GGG        | ....A.C...CC       | GTCGGTC     | ..G...TG.           |
| KJ934161 taxid=1542464;   | C...GTCGGCTTTG.G..CC...C..G                       | ---       | ---                 | --- | TGC.G.G        | ....A.C...C        | GTCGTGC     | ..G...TG.           |
| EF025336 taxid=411803;    | CTTAG.GCGTACTTCA.G..GC.CCG                        | ---       | ---                 | --- | TGGCGGCCGA..GG | CTT.ACCGC          | C.CCC.G     | CGCTC.C....C        |
| JQ771537.1 Neodolichodo   | GT.C.GGTCGGCTTTC..C..CC...C.CTC                   | ---       | ---                 | --- | C.CC.GC...G    | ....C.CC...C       | CGTCGG      | ..G...G..           |
| JQ446376.1 Hemicaloosia   | C.T.GAGTCGGCTTTA.G..CC...C..G                     | ---       | ---                 | --- | A.T.GCG        | ....CGG.C..C       | CAGT        | ..G...TG.           |
| EU306341.1 Hemicyclioph   | C.T.G.GTCGGCTTTG.G..CC...C..G                     | ---       | ---                 | --- | C.C.G.G        | .....C.C           | G.CGTCC     | ..G...TG.           |
| KJ869397.1 Helicotylenc   | G.T..GGTTGGCTTT..CC.CC..AG.G                      | ---       | ---                 | --- | C.CT.GC...G    | TG.GCCCGCAA        | GGT..GTCAGC | C.GGT.C.....        |
| AY284609.1 Rotylenchus    | G.TG..GGTTGGCTTT..CC.CC..AG.G                     | ---       | ---                 | --- | C.CT.GC...G    | TG.GCCCGCAA        | GGT..GTCAGC | C.GGT.C.....        |
| 18S-Mi_Meloidogyne inco   | G.TG.TATCGA.TTA..C..AA.G..G                       | ---       | ---                 | --- | TTT.GA         | TC.T.AACAG         | A.TCT       | TAACAGGCA.T....     |
| EU306351 taxid=364564;    | G...TCGGCTTT..C.CC.....C                          | ---       | ---                 | --- | CATC..G        | ....A.C...T        | CGGTG       | G...G...G.T         |
| EU306350.1 Nagelus obsc   | G...TTGGCTTT..C.C.....C                           | ---       | ---                 | --- | C.TC..G        | ....A.C...T        | GCGCG       | G...G...G.T         |
| KP966493.1 Paratylenchu   | C...GTTGGCTTTG.G..CC...C..G                       | ---       | ---                 | --- | TC.G.C         | ....A.C...G        | G.CGCTC     | ..G...TG.           |
| 18S-Par_Paratylenchus_s   | C...GTCGGCTTTG.G..CC...C..G                       | ---       | ---                 | --- | TC.G.C         | ....C.C...CG       | G.CGCTC     | ..G...TG.           |
| EF029855 taxid=406317;    | GT..A.GTTGGCTTTC..TGCA.CG.ATG                     | ---       | ---                 | --- | CCCGG.GC       | T.CA.AG            | CACC        | GA..TGT.C.TTGCT.... |
| 18S-Pp_Pratylenchus pen   | GATG..TCCGGCTTTC..ACA..G..G                       | ---       | ---                 | --- | TC.G           | CCT.AACCA          | ..GT.GA     | TGTCCGATACT.T...    |
| JQ957898.1 Deladenus du   | G.A.T..TTTGGCTTT..C.C.....T                       | ---       | ---                 | --- | A.TC..G        | ....C.C...G        | CGGC        | ..G...T             |
| AB250212.1 Sphaerularia   | G...T.CGGGCTT.G.C..CC.....T                       | ---       | ---                 | --- | C.TC..A        | ....C.C...T        | CGCG        | G...G...G.T         |
| FJ969144.1 Trophurus im   | G.TGG.GC.GGCTTT..C.TGCA.CAA.TG                    | ---       | ---                 | --- | GCCAG..TC      | T.CACCG            | ..C.TGGT    | TTGTCC.GTGCT....    |
| EU306352 taxid=293578;    | G..AG-GTTGGCTTT..C.TG..CG..G                      | ---       | ---                 | --- | CGC.GA         | TT..AACGG          | ..C.ACCG    | ..C.TGCA.A...T      |
| FJ969113 taxid=312543;    | GCTAA.TCTGGCTTT..C.C.....T                        | ---       | ---                 | --- | C.TC..AG       | ....A.CC.C.T       | GCGCG       | G...G...G.T         |
| AY284591.1 Filenchus th   | GCTA..C.GGCCCTTG...CC.....T                       | ---       | ---                 | --- | CCTC..CG       | ..T..A.CC          | ACT.CGG     | G...G...G.T         |
| KJ869373.1 Tylenchus na   | -CTAA..CGGGCTTTG...CC.....T                       | ---       | ---                 | --- | CCTC..CG       | ..T..A.C           | ACT.CGG     | G...G...G.T         |
| AY284812 taxid=288453;    | .CTC...T.G.CTAAA..CGA.TCG.CTCTA                   | ---       | ---                 | --- | GGTGCT....CC   | AGT.C              | TAG         | A...A.A.C.          |
| AY284809.1 Paraxonchium   | .CTC...T.G.CTAAA..CGA.TCG.CTCTA                   | ---       | ---                 | --- | GGTGCT....A.CC | GT.CCTAG           | A...A.A.C.  |                     |
| EF207248.1 Mesodorylaim   | .CTC...T.G.CTAAA..CGA.TCG.CTCTA                   | ---       | ---                 | --- | GGTGCT....CC   | AGT.C              | TAG         | A...A.A.C.          |
| AJ966513.1 Wilsonema sc   | G.A.C.AAGG..T.A.AC..C.....T                       | ---       | ---                 | --- | CTA.A.GC       | T....C...GT        | TCTAG       | A...G...A.G..       |
| JX445118 taxid=1309579;   | .TAC...T.G.CTAAA..T.A.TC.ACTCTAT                  | ---       | ---                 | --- | GCTGC.T..A.CC  | GT.C               | TAG         | A...A.A.C.          |
| EF207249.1 Xiphinema in   | .TAC...A.G.CTAAA..TCA.TCCG.TCTAC                  | ---       | ---                 | --- | GGTGCT....A.C  | AGT.CCTAG          | ATC         | ..A.A.C.            |
| AJ966472 taxid=344372;    | .CTC.T.T.G.CTAAA..CGA.T.G.CTTTA                   | ---       | ---                 | --- | GGTGCT....AGT  | C.TAA              | A.C         | ..A.A.C.            |
| AY284807 taxid=288432;    | .CTC...T.G.CTAAA..CGA.TCG.CTCTA                   | ---       | ---                 | --- | GGTGCT....CC   | AGT.C              | TAG         | A...A.A.C.          |
| EF207253 taxid=288458;    | .CTC...T.G.CTAAA..CGA.TCG.CTCTA                   | ---       | ---                 | --- | GGTGCT....CC   | AGT.CCTAG          | A...A.A.C.  |                     |
| KF583882.1 Mermis nigre   | .C.C.T...GTCTGAA...GA.T...CTGTT                   | ---       | ---                 | --- | GATGCT....CC   | GT.TCATC           | A...T.A.C.  |                     |
| CAQS01000365 taxid=1365   | .TT...TGGTCTAT...GA.C.G..GGCC                     | ---       | ---                 | --- | AGTACA..C.C    | TGT.C.G            | ..C.GC      | ..T.A.C.            |
| AJ966474 taxid=288489;    | A.TC.T.TGG.CTAAA...A.TA..CTCCT                    | ---       | ---                 | --- | GATGCT....AGT  | TCTTG              | A..TG       | ..A.A.C.            |
| AY552973 taxid=268226;    | A.TC.T.TGG.CTAAA...A.TA..CTCCT                    | ---       | ---                 | --- | GATGCT....AGT  | TCTTG              | A..AG       | ..A.A.C.            |
| AB361437 taxid=293883;    | A.TC.T.CGG.CTAAA...C...TAC.CTCCC                  | ---       | ---                 | --- | GATGCT....AGT  | TCTCG              | A.ATG       | ..A.A.C.            |
| AF036603 taxid=70239;     | CCT...TGG.CTAAAC.C.C.G.T...C.TCT                  | ---       | ---                 | --- | GGTGCT...C.C   | AGT.CCTC           | ..G..G      | ..CA.A.C.           |
| FJ969141.1 Stenonchulus   | CTT...TGG.CTAAACC.TCG.T...CTC                     | ---       | ---                 | --- | ---            | C.C                | AGT.TCTTG   | A..AG...AA.CT       |

|                           | 810                                                     | 820               | 830          | 840                         | 850 | 860 | 870 | 880 |
|---------------------------|---------------------------------------------------------|-------------------|--------------|-----------------------------|-----|-----|-----|-----|
| LC107877 taxid=539210;    | TTTACCTTGAATAAATCAGAGT                                  | GCTCAAGACAAGCGTTT | CGCTTGAATATT | CGTGCATGGAATAATGGAACAGGACTT |     |     |     |     |
| LC095813 taxid=1752120;   | A.....T.A.....A..G...A-...T...C-..AT.....T.T....        |                   |              |                             |     |     |     |     |
| KC206040 taxid=446301;    | ...T...A...T...T.C..G.-AA-.C-...C-...A..T.A..CA         |                   |              |                             |     |     |     |     |
| 18S-Pa_Plectus acuminat   | ...T...A...T...T.C..G.-A-.C-...C-...A..T.A..CA          |                   |              |                             |     |     |     |     |
| KU180671 taxid=293684;    | ...T...GA...T...C..G..A.C-...GA-T...A..A..T..           |                   |              |                             |     |     |     |     |
| 18S-An_Acrobeloides nan   | ...T...GA...T...T..G..A.C-...GA-T...A..A..T..           |                   |              |                             |     |     |     |     |
| EU306344.1 Acrobeloides   | ...T...GA...T...C..G..A-...GA-T...A..A..T..             |                   |              |                             |     |     |     |     |
| 18S-C_Cephalobus_sp       | ...T...GA...T...T..G..A.C-...GA-T...A..A..T..           |                   |              |                             |     |     |     |     |
| AF202152.1 Cervidellus    | ...T...GA...T...T..G..A.C-...GA-T...A..A..T..           |                   |              |                             |     |     |     |     |
| AY284668.1 Heterocephal   | ...T...GA...C..G..C.A-...GA-T...A..A..T..               |                   |              |                             |     |     |     |     |
| 18S-Hb_Heterorhabditis    | ...T...T...T...A...-...GC-..AT...AA.G...                |                   |              |                             |     |     |     |     |
| AF202156.2 Halicephalob   | G...T...G...T.GA...A.T-...GG-T...CAAT..ATG.A.           |                   |              |                             |     |     |     |     |
| KC522707.1 Panagrolaimu   | ...T...A...G..AA-...T.GG-TT...A..T..A                   |                   |              |                             |     |     |     |     |
| AY268117.1 Caenorhabdit   | ...T...C..C...TC.A..G...T...GG-...A..A.C..T..           |                   |              |                             |     |     |     |     |
| AF082999.2 Distolabrell   | ...TC...C...G...A...-...CG-..TT...A...                  |                   |              |                             |     |     |     |     |
| 18S-Rb_Mesorhabditis_be   | ...TC...A...-...G...TT...A...                           |                   |              |                             |     |     |     |     |
| 18S-Ot_Oscheius-tipulae   | A...TAAC.CA...A.TA..T.GATA.G...CT-..C...G.CTA-..A...    |                   |              |                             |     |     |     |     |
| AF083015.1 Teratorhabdi   | ...TC...G...A...-...CG-..TT...A..A..                    |                   |              |                             |     |     |     |     |
| 18S-Sf_Steinernema felt   | ...T...T...T...T.A..G...-...G-..TA...T...               |                   |              |                             |     |     |     |     |
| AY284686.1 Metateterato   | ...T...A...T...A..G.-C-T..C-...T...A...G                |                   |              |                             |     |     |     |     |
| AY284683.1 Teratocephal   | ...T...A...T...A..G..C-..C.C..C..G...A...               |                   |              |                             |     |     |     |     |
| 18S-Dd_Ditylenchus dips   | ...T...C...TC.A..G...A-...G...TT...A..G...T..           |                   |              |                             |     |     |     |     |
| AB368535 taxid=400731;    | A...T...CGGC.T-...TT.AG.G.TC..AT-..AC...CC-G...T.A.GT.. |                   |              |                             |     |     |     |     |
| 18S-Bx_Bursaphelenchus    | A...T...CGGC-...T.AG..TC..AT-..AC...CC-G...A.GT..G      |                   |              |                             |     |     |     |     |
| AB368532 taxid=483518;    | A...T...CGGC-...CG..C.TC..AT-..AC...CC-G...A...A.G...   |                   |              |                             |     |     |     |     |
| 18S-Cr_Mesocriciconema_sp | ...T...GC...GC..G...C-..CG...G-...A...TCA               |                   |              |                             |     |     |     |     |
| KJ934161 taxid=1542464;   | ...T...GC...GC..G...C-..CG...G-...A...TA                |                   |              |                             |     |     |     |     |
| EF025336 taxid=411803;    | ...GC...A...T.A..G...-C.C..C-..TTAC...A..C.TCG          |                   |              |                             |     |     |     |     |
| JQ771537.1 Neodolichodo   | ...T...C...T.A...C-...G-...A..G...T..                   |                   |              |                             |     |     |     |     |
| JQ446376.1 Hemicaloosia   | ...T...GC...GCC..G...C-..CG...G-...A..A..TCA            |                   |              |                             |     |     |     |     |
| EU306341.1 Hemicyclioph   | ...T...GC...GC..G...C-T-..CGA..G-...A...TCA             |                   |              |                             |     |     |     |     |
| KJ869397.1 Helicotylenc   | ...T...C...TC.A..G...C.C-..C-...G-...A..G...T..         |                   |              |                             |     |     |     |     |
| AY284609.1 Rotylenchus    | ...T...C...TC.C..G...C-..C-...G.C-...A..G...T..         |                   |              |                             |     |     |     |     |
| 18S-Mi_Meloidogyne inco   | ...T...C...TC.A..G...T...GA-...A..A.T.T..               |                   |              |                             |     |     |     |     |
| EU306351 taxid=364564;    | ...T...C...T.A..G...C-...G-...A..A..T..                 |                   |              |                             |     |     |     |     |
| EU306350.1 Nagelus obse   | ...T...C...T.A..G...C-...G-...A..A..T..                 |                   |              |                             |     |     |     |     |
| KP966493.1 Paratylenchu   | ...T...GC...GC..G...C.C-..CG...G-...A..A..T..           |                   |              |                             |     |     |     |     |
| 18S-Par_Pratylenchus_s    | ...T...GC...GC..G...C.C-..CG...G-...A..A..T..           |                   |              |                             |     |     |     |     |
| EF029855 taxid=406317;    | ...T...C...TC.A..G...C-...G-...A..G...T..               |                   |              |                             |     |     |     |     |
| 18S-Pp_Pratylenchus_pen   | ...T...T...T.A..G...T-...GA-T...A..G...T..              |                   |              |                             |     |     |     |     |
| JQ957898.1 Deladenus du   | ...T...T...T.A..G...T...T.GC-TT...A..T.T...             |                   |              |                             |     |     |     |     |
| AB250212.1 Sphaerularia   | ...T...C...T.C..G...C-...G-..TT...A..A..T..             |                   |              |                             |     |     |     |     |
| FJ969144.1 Trophurus im   | ...T...C...TC.A..G...C-...G-...A..G...T..               |                   |              |                             |     |     |     |     |
| EU306352 taxid=293578;    | ...T...C...T.A..G...C-...G-...A..G...T..                |                   |              |                             |     |     |     |     |
| FJ969113 taxid=312543;    | ...T...C...T.C..G...C-...G-...A..A..T..                 |                   |              |                             |     |     |     |     |
| AY284591.1 Filenchus th   | ...T...C...T.C..G...C-...GA-...A..A..T..                |                   |              |                             |     |     |     |     |
| KJ869373.1 Tylenchus na   | ...T...C...T.C..G...C-...G-..T...A..A..T..              |                   |              |                             |     |     |     |     |
| AY284812 taxid=288453;    | ...T...A...T...T.AG.G.WAATA.C...A-G...T..C.             |                   |              |                             |     |     |     |     |
| AY284809.1 Paraxonchium   | ...T...A...T...T.AG.G.AAATA.C...A-G...T..C.             |                   |              |                             |     |     |     |     |
| EF207248.1 Mesodorylaim   | ...T...A...T...T.AG.G.AAATA.C...A-G...T..C.             |                   |              |                             |     |     |     |     |
| AJ966513.1 Wilsonema sc   | ...T...A...T...T.AG.G-AA-.C-...C-...A..T.A..CA          |                   |              |                             |     |     |     |     |
| JX445118 taxid=1309579;   | ...T...A...T...T.AG.G-AA.TT.C-...A-G...T..C.            |                   |              |                             |     |     |     |     |
| EF207249.1 Xiphinema in   | ...T...A...T...T.AG.G.GAATA.C...GA-G...T..C.            |                   |              |                             |     |     |     |     |
| AJ966472 taxid=344372;    | ...T...A...T...T.AG.GA.AAATA.TC...A-G...T..C.           |                   |              |                             |     |     |     |     |
| AY284807 taxid=288432;    | ...T...A...T...T.AG.G.AAATA.C...A-G...T..C.             |                   |              |                             |     |     |     |     |
| EF207253 taxid=288458;    | ...T...A...T...T.AG.G.AAATA.C...A-G...T..C.             |                   |              |                             |     |     |     |     |
| KF583882.1 Mermis nigre   | ...T...A...T...T.AG..TA.AT-...A-A...G...T...            |                   |              |                             |     |     |     |     |
| CAQS01000365 taxid=1365   | ...T...A...T...T.AG...T.AC-...-A...G...T...             |                   |              |                             |     |     |     |     |
| AJ966474 taxid=288489;    | ...T...A...T...A.AG.G.T.AC-...A-A...T...                |                   |              |                             |     |     |     |     |
| AY552973 taxid=268226;    | ...T...A...T...A.AG.G.TA.AT-...A-A...T...               |                   |              |                             |     |     |     |     |
| AB361437 taxid=293883;    | ...T...A...T...A.AG.G.TA.AC-...A-A...T...               |                   |              |                             |     |     |     |     |
| AF036603 taxid=70239;     | ...T...A...T...A.AG.G.A.ACT-..C-...G-G...A.T..TA.       |                   |              |                             |     |     |     |     |
| FJ969141.1 Stenonchulus   | ...T...A...T...A.AG.G.GA.GA..C-...C-A...AA.G...TC.      |                   |              |                             |     |     |     |     |

|                          | 890      | 900            | 910     | 920                           | 930                       | 940       | 950     | 960     |
|--------------------------|----------|----------------|---------|-------------------------------|---------------------------|-----------|---------|---------|
| LC107877 taxid=539210;   | CGGTT-CG | -TTCTATTGGTCTC | -AG     | -AACCGATGTAATGGTTAAGAGGGACAGA | -CGGGGGCATCCGTATCGCTGCGTG |           |         |         |
| LC095813 taxid=1752120;  | ....T    | ....G          | ....T   | ....AA                        | ....CC                    | ....TT    | ....C   | ....A   |
| KC206040 taxid=446301;   | ....CTA  | ....T          | ....T   | ....TCG                       | ....T                     | ....TGA   | ....T   | ....T   |
| 18S-Pa_Plectus_acuminat  | ....C    | ....CTA        | ....T   | ....T                         | ....TCG                   | ....T     | ....TGA | ....T   |
| KU180671 taxid=293684;   | ....CCTC | ....T          | ....T   | ....TGT                       | -G                        | ....T     | ....GA  | ....C   |
| 18S-An_Acrobelloides_nan | ....CCTC | ....T          | ....T   | ....TGT                       | -G                        | ....T     | ....GA  | ....C   |
| EU306344.1 Acrobelloides | ....CCTC | ....T          | ....T   | ....TGT                       | -G                        | ....T     | ....GA  | ....C   |
| 18S-C Cephalobus_sp      | ....CCTC | ....T          | ....T   | ....TGT                       | -G                        | ....T     | ....GA  | ....C   |
| AF202152.1 Cervidellus   | ....CCTC | ....T          | ....T   | ....TGT                       | -G                        | ....T     | ....GA  | ....C   |
| AY284668.1 Heterocephal  | ....CCTC | ....T          | ....T   | ....TGT                       | -G                        | ....T     | ....GA  | ....C   |
| 18S-Hb_Heterorhabditis   | ....CTA  | ....T          | ....G   | ....TC                        | ....AG                    | ....T     | ....AT  | ....T   |
| AF202156.2 Halicephalob  | T        | ....ATTTG      | ....T   | ....G                         | ....T                     | ....TA    | ....T   | ....ATC |
| KC522707.1 Panagrolaimu  | T        | ....CATGT      | ....TC  | ....T                         | ....TACT                  | ....T     | ....ATA | ....A   |
| AY268117.1 Caenorhabdit  | ....CA   | ....T          | ....T   | ....TAC                       | -G                        | ....T     | ....GA  | ....C   |
| AF082999.2 Distolabrell  | ....C    | ....T          | ....A   | ....G                         | ....T                     | ....CG    | ....T   | ....GAT |
| 18S-Rb_Mesorhabditis_be  | ....C    | ....T          | ....A   | ....G                         | ....T                     | ....CG    | ....T   | ....GAT |
| 18S-Ot_Oscheius-tipulae  | ....CTTG | ....T          | ....AT  | ....G                         | ....T                     | ....TAGT  | ....T   | ....A   |
| AF083015.1 Teratorhabdi  | ....A    | ....C          | ....T   | ....A                         | ....G                     | ....T     | ....CG  | ....T   |
| 18S-Sf_Steinerinema_felt | ....CGA  | ....T          | ....T   | ....TGT                       | -G                        | ....T     | ....GA  | ....C   |
| AY284686.1 Metateratoce  | ....CTA  | ....T          | ....G   | ....T                         | ....TCG                   | ....T     | ....CGA | ....T   |
| AY284683.1 Teratocephal  | ....CCTA | ....T          | ....G   | ....T                         | ....TCT                   | ....T     | ....GGA | ....T   |
| 18S-Dd_Ditylenchus_dips  | ....CTA  | ....T          | ....T   | ....T                         | ....TATA                  | -G        | ....T   | ....AA  |
| AB368535 taxid=400731;   | T        | ....A          | ....CGA | ....T                         | ....T                     | ....TGT   | ....G   | ....T   |
| 18S-Bx_Bursaphelenchus   | T        | ....C          | ....GA  | ....T                         | ....T                     | ....TGTC  | ....GG  | ....TA  |
| AB368532 taxid=483518;   | ....CCGA | ....T          | ....A   | ....GC                        | ....T                     | ....TGTC  | ....GG  | ....T   |
| 18S-Cr_Mesocriconeuma_sp | ....CCTC | ....T          | ....T   | ....T                         | ....TGT                   | -G        | ....T   | ....GA  |
| KJ934161 taxid=1542464;  | ....CCTC | ....T          | ....T   | ....T                         | ....TGT                   | -G        | ....T   | ....GA  |
| EF025336 taxid=411803;   | ....CCT  | ....T          | ....T   | ....T                         | ....TCCCAGG               | ....T     | ....GA  | ....C   |
| JQ771537.1 Neodolichodo  | ....CCGA | ....T          | ....T   | ....TGCT                      | -G                        | ....T     | ....GA  | ....C   |
| JQ446376.1 Hemicaloosia  | ....CCTC | ....T          | ....T   | ....TGT                       | -G                        | ....T     | ....GA  | ....C   |
| EU306341.1 Hemicyclioph  | ....CCTC | ....T          | ....T   | ....TGT                       | -G                        | ....T     | ....GA  | ....C   |
| KJ869397.1 Helicotylenc  | ....CCGA | ....T          | ....T   | ....TGCT                      | -G                        | ....T     | ....GA  | ....C   |
| AY284609.1 Rotylenchus   | ....CCGA | ....T          | ....T   | ....TGCT                      | -G                        | ....T     | ....GA  | ....C   |
| 18S-Mi_Meloidogyne_inco  | ....CA   | ....T          | ....T   | ....TAC                       | -G                        | ....T     | ....GA  | ....C   |
| EU306351 taxid=364564;   | ....CTA  | ....T          | ....T   | ....TATA                      | -G                        | ....T     | ....GA  | ....C   |
| EU306350.1 Nagelus_obsc  | ....CTA  | ....T          | ....T   | ....TATA                      | -G                        | ....T     | ....GA  | ....C   |
| KP966493.1 Paratylenchu  | ....CTC  | ....T          | ....T   | ....TGT                       | ....T                     | ....GA    | ....C   | ....A   |
| 18S-Par_Paratylenchus_s  | ....CTC  | ....T          | ....T   | ....TGT                       | ....T                     | ....GA    | ....C   | ....A   |
| EF029855 taxid=406317;   | T        | ....CTA        | ....T   | ....T                         | ....TATA                  | -G        | ....T   | ....GA  |
| 18S-Pp_Pratylenchus_pen  | ....CTA  | ....T          | ....T   | ....TATA                      | -G                        | ....T     | ....GA  | ....C   |
| JQ957898.1 Deladenus_du  | T        | ....CTA        | ....T   | ....T                         | ....TATA                  | -G        | ....T   | ....GA  |
| AB250212.1 Sphaerularia  | ....CTA  | ....T          | ....T   | ....TATA                      | -G                        | ....T     | ....GA  | ....C   |
| FJ969144.1 Trophurus_im  | ....CTA  | ....T          | ....T   | ....TATA                      | -G                        | ....T     | ....GA  | ....C   |
| EU306352 taxid=293578;   | ....CTA  | ....T          | ....T   | ....TATA                      | -G                        | ....T     | ....GA  | ....C   |
| FJ969113 taxid=312543;   | ....CTA  | ....T          | ....T   | ....TATA                      | -G                        | ....T     | ....GA  | ....C   |
| AY284591.1 Filenchus_th  | ....CTA  | ....T          | ....T   | ....TATA                      | -G                        | ....T     | ....GA  | ....C   |
| KJ869373.1 Tylenchus_na  | ....CTA  | ....T          | ....T   | ....TATA                      | -G                        | ....T     | ....GA  | ....C   |
| AY284812 taxid=288453;   | ....CTA  | ....T          | ....G   | ....T                         | ....TCG                   | ....A     | ....C   | ....T   |
| AY284809.1 Paraxonchium  | ....CTA  | ....T          | ....G   | ....T                         | ....TCG                   | ....A     | ....C   | ....T   |
| EF207248.1 Mesodorylaim  | ....CTA  | ....T          | ....G   | ....T                         | ....TCG                   | ....A     | ....C   | ....T   |
| AJ966513.1 Wilsonema_sc  | ....CTA  | ....T          | ....T   | ....TCG                       | ....T                     | ....TGA   | ....T   | ....T   |
| JX445118 taxid=1309579;  | ....CTA  | ....T          | ....G   | ....T                         | ....TCG                   | ....AGC   | ....T   | ....G   |
| EF207249.1 Xiphinema_in  | ....CTA  | ....T          | ....G   | ....T                         | ....TCG                   | ....A     | ....T   | ....G   |
| AJ966472 taxid=344372;   | ....CTA  | ....T          | ....G   | ....T                         | ....TCG                   | ....AGC   | ....T   | ....G   |
| AY284807 taxid=288432;   | ....CTA  | ....T          | ....G   | ....T                         | ....TCG                   | ....A     | ....C   | ....T   |
| EF207253 taxid=288458;   | ....CTA  | ....T          | ....G   | ....T                         | ....TCG                   | ....AGC   | ....T   | ....G   |
| KF583882.1 Mermis_nigre  | T        | ....CTTA       | ....T   | ....G                         | ....T                     | ....TTGAG | ....T   | ....A   |
| CAQ801000365 taxid=1365  | T        | ....CCTC       | ....T   | ....G                         | ....T                     | ....G     | ....AG  | ....C   |
| AJ966474 taxid=288489;   | TA       | ....TTA        | ....T   | ....G                         | ....T                     | ....TCGAA | ....T   | ....TA  |
| AY552973 taxid=268226;   | TA       | ....TTA        | ....T   | ....G                         | ....T                     | ....TCGAA | ....C   | ....TA  |
| AB361437 taxid=293883;   | TA       | ....TTA        | ....T   | ....G                         | ....T                     | ....TCGAA | ....T   | ....TA  |
| AF036603 taxid=70239;    | T        | ....CT         | ....T   | ....T                         | ....T                     | ....CG    | ....AGC | ....TA  |
| FJ969141.1 Stenonchulus  | ....A    | ....CTA        | ....T   | ....G                         | ....T                     | ....TCG   | ....A   | ....C   |

|                          | 970    | 980                   | 990                 | 1000   | 1010       | 1020      | 1030      | 1040         |
|--------------------------|--------|-----------------------|---------------------|--------|------------|-----------|-----------|--------------|
| LC107877 taxid=539210;   | AGAGG  | TG-AAAT               | CTTGGACCGCAGCGGGACG | TCCAAC | TGCGAAAGCA | TTTGCCAAG | AAATGCTTC | ATTAATCAAGAA |
| LC095813 taxid=1752120;  |        |                       | A..C..T..           |        |            |           |           |              |
| KC206040 taxid=446301;   |        |                       | A..C..T..           |        |            |           | G..       |              |
| 18S-Pa_Plectus_acuminat  |        |                       | A..C..T..           |        |            |           | G..       |              |
| KU180671 taxid=293684;   |        | T..A..C..T..          |                     |        |            |           |           |              |
| 18S-An_Acrobeloides_nan  |        | T..A..C..T..          |                     |        |            |           |           |              |
| EU306344.1 Acrobeloides  |        | T..A..C..T..          |                     |        |            |           |           |              |
| 18S-C Cephalobus_sp      |        | T..A..C..T..          |                     |        |            |           |           |              |
| AF202152.1 Cervidellus   |        | T..A..C..T..          |                     |        |            |           |           |              |
| AY284668.1 Heterocephal  |        | T..A..C..T..          |                     |        |            |           | R..       |              |
| 18S-Hb_Heterorhabditis   | G..    | G..C..T..AA..         |                     |        |            |           |           |              |
| AF202156.2 Halicephalob  | G..    | CTTAT..A..TA..T..AA.. |                     |        |            |           | T..       |              |
| KC522707.1 Panagrolaimu  | G..    | CTT..A..AA..T..A..    |                     | G..    |            |           | T..       |              |
| AY268117.1 Caenorhabdit  |        | TG..CA..AAA..T..A..   |                     |        |            |           |           |              |
| AF082999.2 Distolabrell  |        | A..A..A..T..A..       |                     |        |            |           |           |              |
| 18S-Rb_Mesorhabditis_be  |        | A..T..T..AA..T..AA..  |                     |        |            |           |           |              |
| 18S-Ot_Oscheius-tipulae  | G..    | C..G..T..T..T..A..    |                     | AA..   |            | CAG..     | C..       |              |
| AF083015.1 Teratorhabdi  |        | A..G..T..A..          |                     |        |            |           |           |              |
| 18S-Sf_Steinerinema_felt |        | G..T..AA..AT..G..     |                     |        |            |           | T..       |              |
| AY284686.1 Metateratoce  |        | A..C..T..T..          |                     |        |            |           |           |              |
| AY284683.1 Teratocephal  |        | A..C..T..             |                     |        |            |           |           |              |
| 18S-Dd_Ditylenchus_dips  |        | A..AA..T..A..         |                     |        |            | G..       |           |              |
| AB368535 taxid=400731;   | G..    | T..A..G..AA..         |                     | G..    | T..        | G..       | T..       |              |
| 18S-Bx_Bursaphelenchus   | G..    | T..A..T..A..          |                     | G..    |            | G..       | T..       |              |
| AB368532 taxid=483518;   | G..    | T..A..A..AA..         |                     | G..    | C..        | G..       | T..       |              |
| 18S-Cr_Mesocriconeuma_sp |        | A..GA..T..A..         |                     |        |            | CGC..     |           |              |
| KJ934161 taxid=1542464;  | T..T.. | A..AT..TGA..T..A..    |                     |        |            | CGC..     |           |              |
| EF025336 taxid=411803;   |        | C..AC..GA..T..A..     |                     |        |            | G..       |           |              |
| JQ771537.1 Neodolichodo  |        | T..AA..GA..T..A..     |                     | T..    | G..G..     | AC..      |           |              |
| JQ446376.1 Hemicaloosia  |        | A..GA..T..A..         |                     |        |            | CGC..     |           |              |
| EU306341.1 Hemicyclioph  |        | A..GA..T..A..         |                     |        |            | CGC..     |           |              |
| KJ869397.1 Helicotylenc  |        | T..AA..GA..T..A..     |                     | G..    |            |           | R..       |              |
| AY284609.1 Rotylenchus   |        | T..AA..GA..T..A..     |                     | G..    |            |           |           |              |
| 18S-Mi_Meloidogyne_inco  |        | TG..CA..AAA..T..A..   |                     |        |            | T..T..    |           |              |
| EU306351 taxid=364564;   |        | AA..AA..T..A..        |                     |        |            |           |           |              |
| EU306350.1 Nagelus_obsc  | TT..   | T..AA..GA..T..A..     |                     | G..    |            |           | G..       |              |
| KP966493.1 Paratylenchu  |        | A..GA..A..            | S..                 |        | AC..C..    |           |           |              |
| 18S-Par_Paratylenchus_s  |        | A..GA..T..A..         |                     |        | C..C..     |           |           |              |
| EF029855 taxid=406317;   |        | A..CA..GA..T..C..     |                     |        |            |           |           |              |
| 18S-Pp_Pratylenchus_pen  |        | T..CA..AAA..T..A..    |                     |        |            |           |           |              |
| JQ957898.1 Deladenus_du  |        | T..AA..A..T..A..      |                     |        | CT..       |           |           |              |
| AB250212.1 Sphaerularia  |        | C..AA..T..A..         |                     |        |            |           |           |              |
| FJ969144.1 Trophurus_im  |        | T..AA..AAA..T..A..    |                     |        |            |           |           |              |
| EU306352 taxid=293578;   |        | T..N..AA..GA..T..A..  |                     |        |            |           |           |              |
| FJ969113 taxid=312543;   |        | Y..AA..KAA..T..A..    |                     |        |            |           |           |              |
| AY284591.1 Filenchus_th  |        | AA..AA..T..A..        |                     |        |            |           |           |              |
| KJ869373.1 Tylenchus_na  |        | MAA..MA..T..A..       |                     |        |            |           |           |              |
| AY284812 taxid=288453;   |        | C..GAA..GA..G..       |                     |        |            | T..       |           |              |
| AY284809.1 Paraxonchium  |        | C..GAA..GA..G..       |                     | K..    |            | T..       |           |              |
| EF207248.1 Mesodorylaim  |        | C..GAA..GA..G..       |                     |        |            | T..       |           |              |
| AJ966513.1 Wilsonema_sc  |        | A..C..T..             |                     |        |            | G..       |           |              |
| JX445118 taxid=1309579;  |        | C..GAA..GA..G..       |                     |        |            | T..       |           |              |
| EF207249.1 Xiphinema_in  |        | C..GAA..GA..G..       |                     |        |            | T..       | G..       |              |
| AJ966472 taxid=344372;   |        | C..AAA..AA..G..       |                     |        |            | T..       |           |              |
| AY284807 taxid=288432;   |        | C..GAA..GA..G..       |                     |        |            | T..       |           |              |
| EF207253 taxid=288458;   |        | C..GAA..GA..G..       |                     |        |            | T..       |           |              |
| KF583882.1 Mermis_nigre  |        | T..AA..AA..           |                     |        |            | T..       | G..       |              |
| CAQS01000365 taxid=1365  |        | T..T..AA..AA..T..     |                     |        |            | T..       | G..       |              |
| AJ966474 taxid=288489;   |        | T..AA..AA..           |                     |        |            | T..       | G..       |              |
| AY552973 taxid=268226;   |        | T..AA..AA..           |                     |        |            | T..       | G..       |              |
| AB361437 taxid=293883;   |        | T..AA..AA..           |                     |        |            | T..       | G..       |              |
| AF036603 taxid=70239;    |        | T..TC..AA..GA..T..    |                     |        |            | T..       | C..       |              |
| FJ969141.1 Stenonchulus  |        | T..TC..AA..GA..T..    | R..                 | R..    |            | T..       | C..       |              |

|                          | 1050          | 1060                                                               | 1070 | 1080 | 1090 | 1100 | 1110 | 1120   |
|--------------------------|---------------|--------------------------------------------------------------------|------|------|------|------|------|--------|
| LC107877 taxid=539210;   | CGAAAGTCAGAGG | ATCGAAGGCGATTAGATACCGCCCTAGTTCTGACCGTAAACGATGCCAAGTAGCGATCAGGCGGTG |      |      |      |      |      |        |
| LC095813 taxid=1752120;  |               |                                                                    |      |      |      | T    | A    | T      |
| KC206040 taxid=446301;   |               | T                                                                  | C    |      |      |      |      | C      |
| 18S-Pa_Plectus_acuminat  |               | T                                                                  | C    |      |      |      |      | C      |
| KU180671 taxid=293684;   |               | T                                                                  | C    |      |      | T    |      | T      |
| 18S-An_Acrobeloides_nan  |               | T                                                                  | C    |      |      |      |      | C      |
| EU306344.1 Acrobeloides  |               | T                                                                  | C    |      |      |      |      | C      |
| 18S-C Cephalobus_sp      |               | T                                                                  | C    |      |      |      |      | C      |
| AF202152.1 Cervidellus   |               | T                                                                  | C    |      |      | T    |      | C      |
| AY284668.1 Heterocephal  |               | T                                                                  | C    |      | C    |      |      | C      |
| 18S-Hb_Heterorhabditis   |               | T                                                                  |      |      |      | T    | T    | CAAT   |
| AF202156.2 Halicephalob  |               |                                                                    |      |      |      | T    | T    | A      |
| KC522707.1 Panagrolaimu  | G             | G                                                                  | C    |      |      | T    | T    | GTTTCG |
| AY268117.1 Caenorhabdit  |               | T                                                                  |      |      |      | T    | C    | TC     |
| AF082999.2 Distolabrell  |               |                                                                    |      | G    |      | A    | T    | CAAT   |
| 18S-Rb_Mesorhabditis_be  |               | T                                                                  |      | G    |      | A    | T    | C      |
| 18S-Ot_Oscheius-tipulae  |               | T                                                                  |      |      |      | T    | T    | CAAT   |
| AF083015.1 Teratorhabdi  |               | T                                                                  |      | G    |      | A    | T    | C      |
| 18S-Sf_Steinerinema_felt | T             | G                                                                  | C    |      | C    | A    | C    | TC     |
| AY284686.1 Metateratoce  |               | T                                                                  | C    |      |      |      |      | C      |
| AY284683.1 Teratocephal  |               | T                                                                  | C    |      |      |      |      | C      |
| 18S-Dd_Ditylenchus_dips  |               | T                                                                  | C    |      |      |      |      | T      |
| AB368535 taxid=400731;   |               |                                                                    |      |      |      |      | GT   | TC     |
| 18S-Bx_Bursaphelenchus   |               | T                                                                  |      | T    |      |      | GT   | C      |
| AB368532 taxid=483518;   |               | T                                                                  |      | TT   |      | C    | GT   | C      |
| 18S-Cr_Mesocriconema_sp  |               | T                                                                  | C    |      |      |      |      | C      |
| KJ934161 taxid=1542464;  |               |                                                                    | C    | A    | G    |      |      | C      |
| EF025336 taxid=411803;   |               | T                                                                  | T    |      |      |      |      | C      |
| JQ771537.1 Neodolichodo  |               | T                                                                  | C    |      |      |      |      | C      |
| JQ446376.1 Hemicaloosia  |               | T                                                                  | C    |      |      | T    |      | C      |
| EU306341.1 Hemicycclioph |               | T                                                                  | C    |      |      |      |      | C      |
| KJ869397.1 Helicotylenc  |               | T                                                                  | C    |      |      |      |      | C      |
| AY284609.1 Rotylenchus   | R             | T                                                                  | C    |      |      |      |      | C      |
| 18S-Mi_Meloidogyne_inco  |               | T                                                                  | C    |      |      |      |      | C      |
| EU306351 taxid=364564;   |               |                                                                    | C    |      |      |      |      | C      |
| EU306350.1 Nagelus obsc  | T             | T                                                                  | C    |      |      |      |      | C      |
| KP966493.1 Paratylenchu  |               | T                                                                  | C    |      |      |      |      | T      |
| 18S-Par_Paratylenchus_s  |               | T                                                                  | C    |      |      |      |      | C      |
| EF029855 taxid=406317;   |               |                                                                    | C    |      |      |      |      | C      |
| 18S-Pp_Pratylenchus_pen  |               | T                                                                  | C    |      |      |      | T    | C      |
| JQ957898.1 Deladenus du  |               |                                                                    | T    | C    |      |      |      | TC     |
| AB250212.1 Sphaerularia  |               | T                                                                  | C    |      |      |      |      | C      |
| FJ969144.1 Trophurus im  |               | T                                                                  | C    |      |      |      |      | C      |
| EU306352 taxid=293578;   | N             | T                                                                  | C    |      |      |      |      | T      |
| FJ969113 taxid=312543;   |               | T                                                                  | C    |      |      |      |      | C      |
| AY284591.1 Filenchus th  |               | T                                                                  | C    |      |      |      |      | C      |
| KJ869373.1 Tylenchus na  |               |                                                                    | W    | C    |      |      |      | T      |
| AY284812 taxid=288453;   | T             | T                                                                  | C    |      | A    |      | A    | C      |
| AY284809.1 Paraxonchium  | T             | T                                                                  | C    |      | A    |      | A    | C      |
| EF207248.1 Mesodorylaim  | T             | T                                                                  | C    |      | A    |      | A    | C      |
| AJ966513.1 Wilsonema sc  |               |                                                                    | C    |      |      |      |      | C      |
| JX445118 taxid=1309579;  | T             | T                                                                  | C    |      | A    |      | A    | C      |
| EF207249.1 Xiphinema in  | T             | T                                                                  | C    |      | A    |      | A    | C      |
| AJ966472 taxid=344372;   | T             | T                                                                  | C    |      | A    |      | A    | C      |
| AY284807 taxid=288432;   | T             | T                                                                  | C    |      | A    |      | A    | C      |
| EF207253 taxid=288458;   | T             | T                                                                  | C    |      | A    |      | A    | C      |
| KF583882.1 Mermis nigre  | T             | T                                                                  | C    |      | A    |      |      | C      |
| CAQS01000365 taxid=1365  | T             | T                                                                  | C    |      | A    |      | G    | C      |
| AJ966474 taxid=288489;   | T             | T                                                                  | C    |      | A    |      |      | C      |
| AY552973 taxid=268226;   | T             | T                                                                  | C    |      | A    |      |      | C      |
| AB361437 taxid=293883;   | T             | T                                                                  | C    |      | A    |      | T    | C      |
| AF036603 taxid=70239;    | T             | T                                                                  | C    |      | A    |      |      | C      |
| FJ969141.1 Stenonchulus  | T             | T                                                                  | C    |      | A    |      | A    | C      |



|                           | 1130         | 1140  | 1150          | 1160                                     | 1170               | 1180         | 1190   | 1200   |
|---------------------------|--------------|-------|---------------|------------------------------------------|--------------------|--------------|--------|--------|
| LC107877 taxid=539210;    | GTGATTTT     | ---   | TGCCCTGCC     | TTGGGAGCTTCCCGGAAACGAAAGTCTTCGGGTCCCGGGG | TAGTATGGTTGCAAAGCT |              |        |        |
| LC095813 taxid=1752120;   | A.AGA..A     | ---   | T.GC..T       | .....T                                   | .....              | .....        | .....  | A..    |
| KC206040 taxid=446301;    | ..A..A       | ---   | C...C.G.G     | .....                                    | .....              | C.....       | A..... | .....  |
| 18S-Pa_Plectus acuminat   | ..A..A       | ---   | C...C.G.G     | .....                                    | .....              | C.....       | A..... | .....  |
| KU180671 taxid=293684;    | .A-....      | ---   | TA.....GTA..A | .....                                    | .....              | C.....       | A..... | .....  |
| 18S-An_Acrobeloides nan   | .A-....      | ---   | TA.....GTG..T | .....                                    | .....              | C.....       | A..... | .....  |
| EU306344.1 Acrobeloides   | .A-....      | ---   | TA.....GTG..T | .....                                    | .....              | C.....       | A..... | .....  |
| 18S-C_Cephalobus_sp       | .A-....      | ---   | TA.....GTG..T | .....                                    | .....              | C.....       | A..... | .....  |
| AF202152.1 Cervidellus    | .A-....      | ---   | TA.....GTG..A | .....                                    | .....              | C.....       | A..... | .....  |
| AY284668.1 Heterocephal   | .A-....      | ---   | TA.....GTG..T | .....                                    | .....              | C.....       | A..... | .....  |
| 18S-Hb_Heterorhabditis    | ..AT-.G      | ---   | A...T..TTG    | .....                                    | .....              | TC.....T     | .....  | .....  |
| AF202156.2 Halicephalob   | ..T...A.A    | ---   | T...A.TTTGAC  | ..T.AT                                   | .....              | TC.....      | G..... | A..    |
| KC522707.1 Panagrolaimu   | .AT....ATATT | ..... | TGAAAC        | .....                                    | .....              | TC.....      | A...C  | .....T |
| AY268117.1 Caenorhabdit   | -T....       | ---   | GA.....AT     | .....                                    | .....              | TC.....      | .....  | .....  |
| AF082999.2 Distolabrell   | ..AT-.AC     | ---   | C...TC.T.G    | .....                                    | A...C              | .....        | .....  | .....  |
| 18S-Rb_Mesorhabditis be   | ..TT-.AC     | ---   | C...T...G     | .....                                    | A...C              | .....        | .....  | .....  |
| 18S-Ot_Oscheius-tipulae   | .GT.A..      | ---   | T...T..T.G    | .....                                    | A...TC             | .....        | .....  | .....  |
| AF083015.1 Teratorhabdi   | ..AT....     | ---   | TC...G        | .....                                    | T...A...C          | .....        | .....  | .....  |
| 18S-Sf_Steinernema felt   | ..A...-      | ---   | A...T..ATG    | .....                                    | AAT                | .....        | C..... | A..... |
| AY284686.1 Metateteratoce | ..A...A      | ---   | C...T...G     | .....                                    | C.....             | .....        | .....  | .....  |
| AY284683.1 Teratocephal   | ..A...A      | ---   | C...T...G     | .....                                    | C.....             | .....        | A..... | .....  |
| 18S-Dd_Ditylenchus dips   | .A.A...-     | ---   | TC...GTA      | .....                                    | C.....             | .....        | A..... | .....  |
| AB368535 taxid=400731;    | .ATT..A      | ---   | T.ATGAG.GA    | ...G                                     | .....              | T...TC       | .....  | A..... |
| 18S-Bx_Bursaphelenchus    | .ATT..A      | ---   | T.ATGAG.G     | ...A..T                                  | .....              | T...TC       | .....  | A..... |
| AB368532 taxid=483518;    | .ATT..A      | ---   | T.ATGAG.G     | ...A...T                                 | .....              | T...TC       | .....  | A..... |
| 18S-Cr_Mesocriconeuma_sp  | .CT.CCA      | ---   | G....GTG      | .....                                    | C.....             | .....        | A..... | .....  |
| KJ934161 taxid=1542464;   | .CT.CAA      | ---   | G....GTG      | .....                                    | C.....             | .....        | A..... | .....  |
| EF025336 taxid=411803;    | .AAT.G       | ---   | C...G..GTG    | ...A.T                                   | .....              | C.....       | .....  | A..... |
| JQ771537.1 Neodolichodo   | .ATTCA..     | ---   | C....GTG      | .....                                    | C.....             | .....        | A..... | .....  |
| JQ446376.1 Hemicaloosia   | .CTC..A      | ---   | G....GTG      | .....                                    | C.....             | .....        | A..... | .....  |
| EU306341.1 Hemicyclioph   | .CTC.AC      | ---   | G....GTG      | .....                                    | C.....             | .....        | A..... | .....  |
| KJ869397.1 Helicotylenc   | .ATTCA..     | ---   | C....GTG      | .....                                    | C.....             | .....        | A..... | .....  |
| AY284609.1 Rotylenchus    | .ATTCA..     | ---   | C....GTG      | .....                                    | C.....             | .....        | A..... | .....  |
| 18S-Mi_Meloidogyne inco   | .AA...ATAT   | ...   | T..GTG        | .....                                    | C.....             | .....        | A..... | .....  |
| EU306351 taxid=364564;    | .A..GCA      | ---   | T....GTG      | .....                                    | C.....             | .....        | A..... | .....  |
| EU306350.1 Nagelus obsc   | .A..GCA      | ---   | T....GTG      | .....                                    | C.....             | .....        | A..... | .....  |
| KP966493.1 Paratylenchu   | ..CTCAA      | ---   | G....GTA      | .....                                    | C.....             | .....        | A..... | .....  |
| 18S-Par_Paratylenchus_s   | ..CTCAA      | ---   | G....GTG      | .....                                    | C.....             | .....        | A..... | .....  |
| EF029855 taxid=406317;    | .AATAA.CA    | ---   | AT....GTG     | .....                                    | C.....             | .....        | A..... | .....  |
| 18S-Pp_Pratylenchus_pen   | T.AT.C.CAA   | AAAAA | ...ATG        | ...A                                     | .....              | C.....       | .....  | .....  |
| JQ957898.1 Deladenus du   | .AAT....     | ---   | G.GA          | .....                                    | C.....             | .....        | A..... | .....  |
| AB250212.1 Sphaerularia   | .A..AA..     | ---   | T....GTG      | .....                                    | C.....             | .....        | A..... | .....  |
| FJ969144.1 Trophurus im   | .ATTA..      | ---   | T....GTG      | .....                                    | C.....             | .....        | A..... | .....  |
| EU306352 taxid=293578;    | .AAT.C       | ---   | T....GTA      | .....                                    | C.....             | .....        | A..... | .....  |
| FJ969113 taxid=312543;    | .A..G.A      | ---   | T....GTGA     | .....                                    | C.....             | .....        | A..... | .....  |
| AY284591.1 Filenchus th   | .A..A..      | ---   | TC....GTG     | .....                                    | C.....             | .....        | A..... | .....  |
| KJ869373.1 Tylenchus na   | .C.T....     | ---   | TC....ATA     | .....T                                   | .....              | C.....       | A..... | .....  |
| AY284812 taxid=288453;    | T.A..A.A     | ---   | A..C.AT.A.C   | .....G                                   | .....              | C...T...TC.T | .....  | A..... |
| AY284809.1 Paraxonchium   | T.A..A.A     | ---   | AA..C.A.A.C   | .....G                                   | .....              | C...T...TC.T | .....  | A..... |
| EF207248.1 Mesodorylaim   | T.A..A.A     | ---   | A..C.AT.A.C   | .....G                                   | .....              | C...T...TC.T | .....  | A..... |
| AJ966513.1 Wilsonema sc   | ..A..A       | ---   | C...C.G.G     | .....                                    | C.....             | .....        | A..... | .....  |
| JX445118 taxid=1309579;   | T.A..A.A     | ---   | A..C.A.A.C    | .....G                                   | .....              | C...T...TC.T | .....  | A..... |
| EF207249.1 Xiphinema in   | T.A..A.A     | ---   | A.A.C.A.A.C   | .....G                                   | .....              | C...T...TC.T | .....  | A..... |
| AJ966472 taxid=344372;    | T.A..A.A     | ---   | C.A.C.AT.A.C  | .....G                                   | .....              | C...T...TC.T | .....  | A..... |
| AY284807 taxid=288432;    | T.A..A.A     | ---   | A..C.AT.A.C   | .....G                                   | .....              | C...T...TC.T | .....  | A..... |
| EF207253 taxid=288458;    | T.A..A.A     | ---   | C.A.C.A.A.C   | .....G                                   | .....              | C...T...TC.T | .....  | A..... |
| KF583882.1 Mermis nigre   | T.A..A.A     | ---   | A.TC.G.G      | .....G                                   | .....              | C...T...T    | .....  | A..... |
| CAQS01000365 taxid=1365   | T.AC...A     | ---   | A.TC.G.G      | .....C..C..G                             | .....              | C...T...T    | .....  | A..... |
| AJ966474 taxid=288489;    | T.A..GA.T    | ---   | A.TC.G.G      | .....G                                   | .....              | C...T...T    | .....  | A..... |
| AY552973 taxid=268226;    | T.A..GA.T    | ---   | A.TC.A.G      | .....C                                   | .....              | C...T...T    | .....  | A..... |
| AB361437 taxid=293883;    | T.A..A.AT    | ---   | A.TC.A.G      | .....C                                   | .....              | C...T.ATA    | .....  | A..... |
| AF036603 taxid=70239;     | T.A...A      | ---   | A.TCCT.G      | ...A                                     | .....G             | C...T...T    | .....  | A..... |
| FJ969141.1 Stenonchulus   | T.A.A...A    | ---   | A.TC.G.G      | .....C..T..G                             | .....              | C...T...T    | .....  | A..... |

|                          | 1210 | 1220 | 1230 | 1240 | 1250 | 1260 | 1270 | 1280 |
|--------------------------|------|------|------|------|------|------|------|------|
| LC107877 taxid=539210;   | GA   | AA   | CT   | TA   | AG   | GA   | AT   | TG   |
| LC095813 taxid=1752120;  | AC   | CG   | GA   | AG   | GG   | CA   | CC   | AC   |
| KC206040 taxid=446301;   | CA   | CC   | AC   | CA   | GG   | AG   | GT   | GG   |
| 18S-Pa_Plectus_acuminat  | AG   | CT   | TC   | GC   | GG   | CT   | TA   | AT   |
| KU180671 taxid=293684;   | TT   | GA   | CT   | CA   | AC   | CG   | GG   | AA   |
| 18S-An_Acrobeloides_nan  | AA   | CT   | CA   | AC   | CG   | GG   | AA   | AA   |
| EU306344.1 Acrobeloides  | CT   | CA   | AC   | CG   | GG   | AA   | AA   | CT   |
| 18S-C Cephalobus_sp      | CA   | AC   | CG   | GG   | AA   | AA   | CT   | CA   |
| AF202152.1 Cervidellus   | CA   | AC   | CG   | GG   | AA   | AA   | CT   | CA   |
| AY284668.1 Heterocephal  | CA   | AC   | CG   | GG   | AA   | AA   | CT   | CA   |
| 18S-Hb_Heterorhabditis   | CA   | AC   | CG   | GG   | AA   | AA   | CT   | CA   |
| AF202156.2 Halicephalob  | CA   | AC   | CG   | GG   | AA   | AA   | CT   | CA   |
| KC522707.1 Panagrolaimu  | CA   | AC   | CG   | GG   | AA   | AA   | CT   | CA   |
| AY268117.1 Caenorhabdit  | CA   | AC   | CG   | GG   | AA   | AA   | CT   | CA   |
| AF082999.2 Distolabrell  | CA   | AC   | CG   | GG   | AA   | AA   | CT   | CA   |
| 18S-Rb_Mesorhabditis_be  | CA   | AC   | CG   | GG   | AA   | AA   | CT   | CA   |
| 18S-Ot_Oscheius-tipulae  | CA   | AC   | CG   | GG   | AA   | AA   | CT   | CA   |
| AF083015.1 Teratorhabdi  | CA   | AC   | CG   | GG   | AA   | AA   | CT   | CA   |
| 18S-Sf_Steinerinema_felt | CA   | AC   | CG   | GG   | AA   | AA   | CT   | CA   |
| AY284686.1 Metateratoce  | CA   | AC   | CG   | GG   | AA   | AA   | CT   | CA   |
| AY284683.1 Teratocephal  | CA   | AC   | CG   | GG   | AA   | AA   | CT   | CA   |
| 18S-Dd_Ditylenchus_dips  | CA   | AC   | CG   | GG   | AA   | AA   | CT   | CA   |
| AB368535 taxid=400731;   | CA   | AC   | CG   | GG   | AA   | AA   | CT   | CA   |
| 18S-Bx_Bursaphelenchus   | CA   | AC   | CG   | GG   | AA   | AA   | CT   | CA   |
| AB368532 taxid=483518;   | CA   | AC   | CG   | GG   | AA   | AA   | CT   | CA   |
| 18S-Cr_Mesocriconeuma_sp | CA   | AC   | CG   | GG   | AA   | AA   | CT   | CA   |
| KJ934161 taxid=1542464;  | CA   | AC   | CG   | GG   | AA   | AA   | CT   | CA   |
| EF025336 taxid=411803;   | CA   | AC   | CG   | GG   | AA   | AA   | CT   | CA   |
| JQ771537.1 Neodolichodo  | CA   | AC   | CG   | GG   | AA   | AA   | CT   | CA   |
| JQ446376.1 Hemicaloosia  | CA   | AC   | CG   | GG   | AA   | AA   | CT   | CA   |
| EU306341.1 Hemicyclioph  | CA   | AC   | CG   | GG   | AA   | AA   | CT   | CA   |
| KJ869397.1 Helicotylenc  | CA   | AC   | CG   | GG   | AA   | AA   | CT   | CA   |
| AY284609.1 Rotylenchus   | CA   | AC   | CG   | GG   | AA   | AA   | CT   | CA   |
| 18S-Mi_Meloidogyne_inco  | CA   | AC   | CG   | GG   | AA   | AA   | CT   | CA   |
| EU306351 taxid=364564;   | CA   | AC   | CG   | GG   | AA   | AA   | CT   | CA   |
| EU306350.1 Nagelus obsc  | CA   | AC   | CG   | GG   | AA   | AA   | CT   | CA   |
| KP966493.1 Paratylenchu  | CA   | AC   | CG   | GG   | AA   | AA   | CT   | CA   |
| 18S-Par_Pratylenchus_s   | CA   | AC   | CG   | GG   | AA   | AA   | CT   | CA   |
| EF029855 taxid=406317;   | CA   | AC   | CG   | GG   | AA   | AA   | CT   | CA   |
| 18S-Pp_Pratylenchus_pen  | CA   | AC   | CG   | GG   | AA   | AA   | CT   | CA   |
| JQ957898.1 Deladenus du  | CA   | AC   | CG   | GG   | AA   | AA   | CT   | CA   |
| AB250212.1 Sphaerularia  | CA   | AC   | CG   | GG   | AA   | AA   | CT   | CA   |
| FJ969144.1 Trophurus im  | CA   | AC   | CG   | GG   | AA   | AA   | CT   | CA   |
| EU306352 taxid=293578;   | CA   | AC   | CG   | GG   | AA   | AA   | CT   | CA   |
| FJ969113 taxid=312543;   | CA   | AC   | CG   | GG   | AA   | AA   | CT   | CA   |
| AY284591.1 Filenchus th  | CA   | AC   | CG   | GG   | AA   | AA   | CT   | CA   |
| KJ869373.1 Tylenchus na  | CA   | AC   | CG   | GG   | AA   | AA   | CT   | CA   |
| AY284812 taxid=288453;   | CA   | AC   | CG   | GG   | AA   | AA   | CT   | CA   |
| AY284809.1 Paraxonchium  | CA   | AC   | CG   | GG   | AA   | AA   | CT   | CA   |
| EF207248.1 Mesodorylaim  | CA   | AC   | CG   | GG   | AA   | AA   | CT   | CA   |
| AJ966513.1 Wilsonema sc  | CA   | AC   | CG   | GG   | AA   | AA   | CT   | CA   |
| JX445118 taxid=1309579;  | CA   | AC   | CG   | GG   | AA   | AA   | CT   | CA   |
| EF207249.1 Xiphinema in  | CA   | AC   | CG   | GG   | AA   | AA   | CT   | CA   |
| AJ966472 taxid=344372;   | CA   | AC   | CG   | GG   | AA   | AA   | CT   | CA   |
| AY284807 taxid=288432;   | CA   | AC   | CG   | GG   | AA   | AA   | CT   | CA   |
| EF207253 taxid=288458;   | CA   | AC   | CG   | GG   | AA   | AA   | CT   | CA   |
| KF583882.1 Mermis nigre  | CA   | AC   | CG   | GG   | AA   | AA   | CT   | CA   |
| CAQS01000365 taxid=1365  | CA   | AC   | CG   | GG   | AA   | AA   | CT   | CA   |
| AJ966474 taxid=288489;   | CA   | AC   | CG   | GG   | AA   | AA   | CT   | CA   |
| AY552973 taxid=268226;   | CA   | AC   | CG   | GG   | AA   | AA   | CT   | CA   |
| AB361437 taxid=293883;   | CA   | AC   | CG   | GG   | AA   | AA   | CT   | CA   |
| AF036603 taxid=70239;    | CA   | AC   | CG   | GG   | AA   | AA   | CT   | CA   |
| FJ969141.1 Stenonchulus  | CA   | AC   | CG   | GG   | AA   | AA   | CT   | CA   |

|                           | 1290                                               | 1300                           | 1310 | 1320 | 1330 | 1340 | 1350 | 1360 |
|---------------------------|----------------------------------------------------|--------------------------------|------|------|------|------|------|------|
| LC107877 taxid=539210;    | CCGGCCCCGACACTGTAATGATTGACAGATTGAGAGTTCTTTCTTGATT  | CGGTGGTGGTGGTGCATGGCCGTTCTTACT |      |      |      |      |      |      |
| LC095813 taxid=1752120;   | .....G.....A.....C.....                            |                                |      |      |      |      |      |      |
| KC206040 taxid=446301;    | .....C.....G.....C.....                            |                                |      |      |      |      |      |      |
| 18S-Pa_Plectus acuminat   | .....C.....G.....C.....                            |                                |      |      |      |      |      |      |
| KU180671 taxid=293684;    | .....C.....G.....T.....C.....A.....                |                                |      |      |      |      |      |      |
| 18S-An_Acrobeloides nan   | .....C.....G.....T.....C.....A.....                |                                |      |      |      |      |      |      |
| EU306344.1 Acrobeloides   | .....C.....G.....T.....C.....A.....                |                                |      |      |      |      |      |      |
| 18S-C_Cephalobus_sp       | .....C.....G.....T.....C.....A.....                |                                |      |      |      |      |      |      |
| AF202152.1 Cervidellus    | .....C.....G.....T.....C.....A.....                |                                |      |      |      |      |      |      |
| AY284668.1 Heterocephal   | .....C.....G.....T.....C.....A.....                |                                |      |      |      |      |      |      |
| 18S-Hb_Heterorhabditis    | .....C.....T.....G.....A.....C.....C.....T.....    |                                |      |      |      |      |      |      |
| AF202156.2 Halicephalob   | ...T.TA...AA...A...C...T.TA...C.AA...ATA...CAAA... |                                |      |      |      |      |      |      |
| KC522707.1 Panagrolaimu   | ...T.TA...A...G...T...C.T...A...T...A...           |                                |      |      |      |      |      |      |
| AY268117.1 Caenorhabdit   | ...T...CA.T.G.C...A.C...C...T...                   |                                |      |      |      |      |      |      |
| AF082999.2 Distolabrell   | .....C.....T.....G.....C.....A.....C.....          |                                |      |      |      |      |      |      |
| 18S-Rb_Mesorhabditis_be   | .....C.....G.....C.....C.....                      |                                |      |      |      |      |      |      |
| 18S-Ot_Oscheius-tipulae   | .....C.....T.....G.....A.....C.....C.....T.....    |                                |      |      |      |      |      |      |
| AF083015.1 Teratorhabdi   | .....C.....G.....T.....C.....A.....C.....A.....    |                                |      |      |      |      |      |      |
| 18S-Sf_Steinernema felt   | .....C.....G.....A.....C.....A.....                |                                |      |      |      |      |      |      |
| AY284686.1 Metateratoce   | .....C.....G.....G.....C.....                      |                                |      |      |      |      |      |      |
| AY284683.1 Teratocephal   | .....C.....G.....G.....                            |                                |      |      |      |      |      |      |
| 18S-Dd_Ditylenchus dips   | .....CA...G.....T...C.T...A...T...A...             |                                |      |      |      |      |      |      |
| AB368535 taxid=400731;    | ...A.T...TC...G.....C...T...C.T...A...A...         |                                |      |      |      |      |      |      |
| 18S-Bx_Bursaphelenchus_   | ...A.T...TC...G.....C...C...A...A...               |                                |      |      |      |      |      |      |
| AB368532 taxid=483518;    | ...A.T...T...G.....C...T...C...A...AA...           |                                |      |      |      |      |      |      |
| 18S-Cr_Mesocriciconema_sp | .....C.....G.....T...C.T...A...                    |                                |      |      |      |      |      |      |
| KJ934161 taxid=1542464;   | .....C.....G.....T...C.T...A...                    |                                |      |      |      |      |      |      |
| EF025336 taxid=411803;    | .....C.....G.....C...A...                          |                                |      |      |      |      |      |      |
| JQ771537.1 Neodolichodo   | ...AC...G.....A.AA.T...C.T...A...A...              |                                |      |      |      |      |      |      |
| JQ446376.1 Hemicaloosia   | .....C.....G.....G.....T...C.T...A...              |                                |      |      |      |      |      |      |
| EU306341.1 Hemicyclioph   | .....C.....G.....G.....T...C.T...A...              |                                |      |      |      |      |      |      |
| KJ869397.1 Helicotylen    | .....C.....G.....T...C.T...A...A...                |                                |      |      |      |      |      |      |
| AY284609.1 Rotylenchus    | .....C.....G.....T...C.T...A...A...                |                                |      |      |      |      |      |      |
| 18S-Mi_Meloidogyne inco   | .....G.....G.....T...C.T...A...A...A...            |                                |      |      |      |      |      |      |
| EU306351 taxid=364564;    | .....C.....G.....T...C.T...A...A...                |                                |      |      |      |      |      |      |
| EU306350.1 Nagelus obsc   | .....C.....G.....T...C.T...A...A...                |                                |      |      |      |      |      |      |
| KP966493.1 Paratylenchu   | .....C.....G.....G.....T...C.T...A...              |                                |      |      |      |      |      |      |
| 18S-Par_Pratylenchus_s    | .....C.....G.....G.....T...C.T...A...              |                                |      |      |      |      |      |      |
| EF029855 taxid=406317;    | .....C.....G.....T...C.T...A...A...                |                                |      |      |      |      |      |      |
| 18S-Pp_Pratylenchus_pen   | .....C.....G.....G.....T...C...A...A...            |                                |      |      |      |      |      |      |
| JQ957898.1 Deladenus du   | ...A...G.....T...C...A...T...A...A...              |                                |      |      |      |      |      |      |
| AB250212.1 Sphaerularia   | .....C.....G.....G.....T...C.T...A...A...          |                                |      |      |      |      |      |      |
| FJ969144.1 Trophurus im   | .....C.....G.....G.....T...C.T...A...A...          |                                |      |      |      |      |      |      |
| EU306352 taxid=293578;    | .....CT...G.....T...C.T...A...A...                 |                                |      |      |      |      |      |      |
| FJ969113 taxid=312543;    | .....C.....G.....T...C.T...A...A...                |                                |      |      |      |      |      |      |
| AY284591.1 Filenchus th   | .....C.....G.....T...C.T...A...C...A...            |                                |      |      |      |      |      |      |
| KJ869373.1 Tylenchus na   | ...G.....C.....G.....A...C...C.T...A...            |                                |      |      |      |      |      |      |
| AY284812 taxid=288453;    | .....C.....G.....C...C...C...A...G...              |                                |      |      |      |      |      |      |
| AY284809.1 Paraxonchium   | ...T.....C.....G.....C...C...A.C...G...            |                                |      |      |      |      |      |      |
| EF207248.1 Mesodorylaim   | .....C.....G.....C...C...A...G...                  |                                |      |      |      |      |      |      |
| AJ966513.1 Wilsonema sc   | .....C.....G.....C...C...A...G...                  |                                |      |      |      |      |      |      |
| JX445118 taxid=1309579;   | .....C.....G.....C...C...A...G...                  |                                |      |      |      |      |      |      |
| EF207249.1 Xiphinema in   | .....G.....C...C...A...G...                        |                                |      |      |      |      |      |      |
| AJ966472 taxid=344372;    | .....G.....C...C...A...A...G...                    |                                |      |      |      |      |      |      |
| AY284807 taxid=288432;    | .....C.....G.....C...C...A...G...T...              |                                |      |      |      |      |      |      |
| EF207253 taxid=288458;    | .....C.....G.....C...C...A...G...                  |                                |      |      |      |      |      |      |
| KF583882.1 Mermis nigre   | ...AA...AA...G.....T...C...C...TT...G...           |                                |      |      |      |      |      |      |
| CAQS01000365 taxid=1365   | ...T.A...A...G.....T...C...C...TT...G...           |                                |      |      |      |      |      |      |
| AJ966474 taxid=288489;    | ...A...AA...G.....T...C...TT...G...                |                                |      |      |      |      |      |      |
| AY552973 taxid=268226;    | ...A...AA...G.....T...C...TT...G...                |                                |      |      |      |      |      |      |
| AB361437 taxid=293883;    | ...A...AA...G.....T...C...TT...G...                |                                |      |      |      |      |      |      |
| AF036603 taxid=70239;     | .....C.....G.....C...G...G...                      |                                |      |      |      |      |      |      |
| FJ969141.1 Stenonchulus   | .....C.....G.....C...G...G...                      |                                |      |      |      |      |      |      |

|                          | 1370             | 1380          | 1390           | 1400     | 1410       | 1420  | 1430   | 1440 |
|--------------------------|------------------|---------------|----------------|----------|------------|-------|--------|------|
| LC107877 taxid=539210;   | TGGTGGAGTGATTGTC | TGGTTTATTCCGA | TAACGAACGAGACT | CTAACCTG | CTAACTAGTC | TGGCG |        | AT   |
| LC095813 taxid=1752120;  | T                |               |                |          | A          | A     | TCT    | G    |
| KC206040 taxid=446301;   | C                |               |                | GG       | A          |       | AGACAG |      |
| 18S-Pa_Plectus_acuminat  | C                |               |                | GG       | A          |       | GACAG  |      |
| KU180671 taxid=293684;   | C                | TC            |                | G        |            | A     | AAC    | GA   |
| 18S-An_Acrobelloides_nan | C                | TC            |                | G        |            | A     | AAC    | A    |
| EU306344.1 Acrobelloides | C                | TC            |                | G        |            | A     | CTAC   | G    |
| 18S-C_Cephalobus_sp      | C                | TC            |                | G        |            | A     | AAC    | A    |
| AF202152.1 Cervidellus   | C                | TC            |                | G        |            | A     | AAC    | GA   |
| AY284668.1 Heterocephal  | C                | TC            |                | G        |            | A     | AAC    | A    |
| 18S-Hb_Heterorhabditis   | C                |               |                | G        |            |       | G      | CCA  |
| AF202156.2 Halicephalob  | C                | A             | C              |          | A          | T     |        |      |
| KC522707.1 Panagrolaimu  | C                | T             |                |          | T          | GG    | G      | T    |
| AY268117.1 Caenorhabdit  |                  |               |                | G        |            | G     |        | TG   |
| AF082999.2 Distolabrell  |                  | C             |                | G        |            | G     | A      | G    |
| 18S-Rb_Mesorhabditis_be  |                  | C             |                | G        |            | G     | ACC    | A    |
| 18S-Ot_Oscheius-tipulae  |                  | T             |                |          |            |       |        |      |
| AF083015.1 Teratorhabdi  |                  | C             |                | G        |            | G     | ACG    | A    |
| 18S-Sf_Steinernema_felt  |                  | T             |                | G        |            | T     | A      | T    |
| AY284686.1 Metateratoce  |                  | C             |                |          | G          | A     |        | G    |
| AY284683.1 Teratocephal  |                  | C             |                | G        |            | G     |        | G    |
| 18S-Dd_Ditylenchus_dips  |                  | C             |                | G        |            | G     |        | C    |
| AB368535 taxid=400731;   |                  | C             |                | G        |            | T     | G      | A    |
| 18S-Bx_Bursaphelenchus   |                  | C             |                | T        |            | A     | T      | A    |
| AB368532 taxid=483518;   |                  | C             |                | T        |            | A     | T      | A    |
| 18S-Cr_Mesocriconeuma_sp |                  | C             |                | TC       |            | G     |        | AC   |
| KJ934161 taxid=1542464;  |                  | C             |                | TC       |            | G     |        | GC   |
| EF025336 taxid=411803;   |                  | T             |                | C        |            | GG    |        | G    |
| JQ771537.1 Neodolichodo  |                  | C             |                | C        |            | G     |        | TG   |
| JQ446376.1 Hemicaloosia  |                  | C             |                | TC       |            | G     |        | AC   |
| EU306341.1 Hemicyclioph  |                  | C             |                | TC       |            | G     |        | GC   |
| KJ869397.1 Helicotylenc  |                  | C             |                | C        |            | GG    |        | TG   |
| AY284609.1 Rotylenchus   |                  | C             |                | C        |            | GG    |        | TG   |
| 18S-Mi_Meloidogyne_inco  |                  | C             |                |          |            | A     |        | TG   |
| EU306351 taxid=364564;   |                  | C             |                | C        |            | G     |        | C    |
| EU306350.1 Nagelus obsc  |                  | C             |                | C        |            | G     |        | C    |
| KP966493.1 Paratylenchu  |                  | C             |                | TC       |            | G     |        | GGC  |
| 18S-Par_Paratylenchus_s  |                  | C             |                | TC       |            | G     |        | GGC  |
| EF029855 taxid=406317;   |                  | C             |                | C        |            | GG    |        | G    |
| 18S-Fp_Pratylenchus_pen  |                  | C             |                | C        |            | G     |        | T    |
| JQ957898.1 Deladenus du  |                  | C             |                |          |            | G     |        | T    |
| AB250212.1 Sphaerularia  |                  | C             |                |          |            | G     |        | T    |
| FJ969144.1 Trophurus im  |                  | C             |                | C        |            | GG    |        | AC   |
| EU306352 taxid=293578;   |                  | C             |                | C        |            | G     |        | G    |
| FJ969113 taxid=312543;   |                  | C             |                | C        |            | G     |        | C    |
| AY284591.1 Filenchus th  |                  | C             |                | C        |            | G     |        | TC   |
| KJ869373.1 Tylenchus na  |                  | C             |                | C        |            | G     |        | TG   |
| AY284812 taxid=288453;   |                  | C             |                | A        |            | GG    |        | A    |
| AY284809.1 Paraxonchium  |                  | C             |                | A        |            | GG    |        | A    |
| EF207248.1 Mesodorylaim  |                  | C             |                | A        |            | GG    |        | A    |
| AJ966513.1 Wilsonema sc  |                  | C             |                |          |            | GG    |        | A    |
| JX445118 taxid=1309579;  |                  | C             |                | A        |            | GG    |        | A    |
| EF207249.1 Xiphinema in  |                  | C             |                | A        |            | GG    |        | A    |
| AJ966472 taxid=344372;   |                  | C             |                | A        |            | GG    |        | A    |
| AY284807 taxid=288432;   |                  | C             |                | A        |            | GG    |        | A    |
| EF207253 taxid=288458;   |                  | C             |                | A        |            | GG    |        | A    |
| KF583882.1 Mermis nigre  |                  | C             |                | A        |            | G     |        | A    |
| CAQ801000365 taxid=1365  |                  |               |                |          |            | T     |        | G    |
| AJ966474 taxid=288489;   |                  | C             |                | A        |            | G     |        | A    |
| AY552973 taxid=268226;   |                  | C             |                | A        |            | G     |        | A    |
| AB361437 taxid=293883;   |                  | C             |                | A        |            | G     |        | A    |
| AF036603 taxid=70239;    |                  | C             |                | A        |            | G     |        | A    |
| FJ969141.1 Stenonchulus  |                  | C             |                | A        |            | G     |        | A    |

|                          | 1450 | 1460            | 1470         | 1480                    | 1490   | 1500                   | 1510    | 1520  |
|--------------------------|------|-----------------|--------------|-------------------------|--------|------------------------|---------|-------|
| LC107877 taxid=539210;   | TTTT | GGG             | TCGTCGAGA    | CTTCTTAGAGGGATCAGTGGTGT | TT     | CAGCCACACGAAATTGAGCAAT |         |       |
| LC095813 taxid=1752120;  | AGC  | T               | CAGTT        |                         | A      |                        | T       | G     |
| KC206040 taxid=446301;   | A    | ACT             | C.G.TT       |                         | CA     | T                      |         |       |
| 18S-Pa_Plectus_acuminat  | A    | ACT             | C.G.T        |                         | CA     | T                      |         |       |
| KU180671 taxid=293684;   | A    | CTACTGT         | TCCA.TTG     |                         | TTTC   |                        | T       | G     |
| 18S-An_Acrobelloides_nan | A    | TCAATGT         | TCA.TTG      |                         | TTTC   |                        | T       | G     |
| EU306344.1 Acrobelloides | A    | TCAATGT         | CCG.T.G      |                         | TTTC   |                        | T       | G     |
| 18S-C_Cephalobus_sp      | A    | TCAATGT         | TCA.TTG      |                         | TTTC   |                        | T       | G     |
| AF202152.1 Cervidellus   | A    | CTACTGT         | TC.A.TTG     |                         | TTTC   |                        | T       | G     |
| AY284668.1 Heterocephal  | G    | CCTATGT         | TCA.CTG      |                         | TTTC   |                        | T       | G     |
| 18S-Hb_Heterorhabditis   | A.A  | AA              | TGGCTT       |                         | A.C    |                        | T       | G     |
| AF202156.2 Halicephalob  | A    | ATGTATCATAC     | G            | GA                      | A.T    | AT.CAAAT.A             | ATTG.CT | ACTG  |
| KC522707.1 Panagrolaimu  | C    | TTCTTACGGATTGAA | CGTGACTATTT  | AT                      | TT.C.C | C                      | T       | GT.A  |
| AY268117.1 Caenorhabdit  | C.C  | G               | TCGTATA      |                         | A.C    |                        | T       | G     |
| AF082999.2 Distolabrell  | AA   | TT              | CC.AGA       | G                       | GG.C   | A.A                    | G       |       |
| 18S-Rb_Mesorhabditis_be  | AA   | TC              | TCG.AG.T     | G                       | A      | TG.C                   | A.C     | G     |
| 18S-Ot_Oscheius-tipulae  |      |                 |              |                         |        |                        |         |       |
| AF083015.1 Teratorhabdi  | AA   | TC              | CTCGGTGTC    | G                       | A      | GG.C                   | A.A     | G.A.G |
| 18S-Sf_Steinerhemia_felt | CC   | TC              | GAG.GTAGCGTT |                         | A      | CAGACAAC               | T       | TTGT  |
| AY284686.1 Metateratoce  | GC   | TCT             | CAGA.T       |                         | CA     |                        |         |       |
| AY284683.1 Teratocephal  | AGC  | TA              | CGG.TC       |                         | CA     | C                      |         | AT.G  |
| 18S-Dd_Ditylenchus_dips  | G    | CTTCTGTGATG     | AGT          |                         | TTTC   |                        | A       |       |
| AB368535 taxid=400731;   | GC   | TCGGCTTCGAGT    | AT.C         |                         | A.A    | TT                     | T.C     | T.A   |
| 18S-Bx_Bursaphelenchus   | GC   | TCGGCT          | CGTGT.AT.C   |                         | A.A    | TT                     | T       | A     |
| AB368532 taxid=483518;   | CG   | TACGCT          | CAA.ATA.C    |                         | A.A.A  | TT.G                   | T.C     | A.T.A |
| 18S-Cr_Mesocriconeuma_sp | GCC  | TCT.TGC         | .G.AC        |                         | TGACT  | C.C                    | T       | GGT   |
| KJ934161 taxid=1542464;  | GCC  | TCT.TGC         | T.AC         |                         | TG     | CT.C                   | C       | T     |
| EF025336 taxid=411803;   | GC   | TCCACT          | TGCG.C.AC    |                         | TTTC   |                        |         |       |
| JQ771537.1 Neodolichodo  | GC   | TCT.TGCG        | ACGAC        |                         | TTTC   |                        |         |       |
| JQ446376.1 Hemicaloosia  | GCC  | TCT.TGCCT       | G.AC         |                         | TG     | CT.C                   | C       | T     |
| EU306341.1 Hemicyclioph  | GC   | ATT.TGC         | ATG.AC       |                         | TG     | CT.C                   | C       | T     |
| KJ869397.1 Helicotylenc  | GC   | ACT.TGCG        | ACAAC        |                         | TTTC   |                        |         |       |
| AY284609.1 Rotylenchus   | GC   | ACT.TGCG        | ACAAC        |                         | TTTC   |                        |         |       |
| 18S-Mi_Meloidogyne_inco  | AC.C | TTA.TGTATACA    | G            |                         | TT.C   | C                      |         | GA.A  |
| EU306351 taxid=364564;   |      | ACTTTGTGTTGT    | GT           |                         | TTTC   |                        | A       |       |
| EU306350.1 Nagelus_obsc  | A    | CTTTTGTGATGT    | GT           |                         | TTTC   |                        | A       |       |
| KP966493.1 Paratylenchu  | GCC  | GCT.TGC         | .AC          |                         | TG     | CT.C                   | C       | AG    |
| 18S-Par_Paratylenchus_s  | GCC  | GCT.TGC         | .AC          |                         | TG     | CT.C                   | C       | AG    |
| EF029855 taxid=406317;   | GC   | TCT.TGTG        | A.ACC        |                         | TC.C   | A                      | TT      |       |
| 18S-Pp_Pratylenchus_pen  | G.C  | TCT.CGCATAAA    |              |                         | TC.C   | A                      |         | T.G   |
| JQ957898.1 Deladenus_du  | A    | TT.CTGTTTAT     | .T           |                         | C      | A                      | TTTC    | T.A   |
| AB250212.1 Sphaerularia  | G    | GCAATGTGT       | .T.TA        |                         | C      | A                      | TTTC    | A     |
| FJ969144.1 Trophurus_im  | G    | TCT.TGTG        | .CG          |                         | TTTC   |                        | A       |       |
| EU306352 taxid=293578;   | GCC  | TCT.TGTG        | ACG          | G                       | TTTC   |                        |         |       |
| FJ969113 taxid=312543;   | G    | CTTCTGTGTTG     | .GT          |                         | TTTC   |                        | T       |       |
| AY284591.1 Filenchus_th  | G.C  | AACCTTGTGT      | CGCTT        |                         | TTTC   |                        |         |       |
| KJ869373.1 Tylenchus_na  |      | ACACTGTG        | .CTA         |                         | TTAC   | C                      |         | T     |
| AY284812 taxid=288453;   |      | AAAAG.ATATCGCG  |              |                         | CA     | C.C                    | C       | T     |
| AY284809.1 Paraxonchium  |      | CACAG.ATATCGA   |              |                         | CA     | C.C                    | C       | T     |
| EF207248.1 Mesodorylaim  |      | AAAAG.ATATCGC   |              |                         | CA     | C.C                    | C       | T     |
| AJ966513.1 Wilsonema_sc  | A    | ACT             | C.G.TT       |                         | CA     |                        | T       |       |
| JX445118 taxid=1309579;  | A.G  | AAAA            | G.TTA.CGCG   |                         | CA     | CC                     | CT.C    | T     |
| EF207249.1 Xiphinema_in  | C.AG | AAAAAG.ATA      | C.C          |                         | CA     | CC                     | C.C     | T     |
| AJ966472 taxid=344372;   |      | AAAAAG.ATCTCGCG |              |                         | CA     | C.C                    | C       | T     |
| AY284807 taxid=288432;   |      | AAAAAG.ATATCGA  |              |                         | CA     | C.C                    | C       | T     |
| EF207253 taxid=288458;   | CG   | AAAAAG.ATATCGCG |              |                         | CA     | C.C                    | C       | T     |
| KF583882.1 Mermis_nigre  | G    | TT              | AT.ACGTC     |                         | CA     | CA                     | C       | T     |
| CAQ801000365 taxid=1365  | C    | TT              | CTG.ATGGCGAC |                         | CA     | CA                     | CAA     | T     |
| AJ966474 taxid=288489;   |      | TTA             | G.TT.TCGAG   |                         | CA     | CA                     | CT.C    | T     |
| AY552973 taxid=268226;   | A    | TTA             | G.TTATCGAG   |                         | CA     | CA                     | CT.C    | T     |
| AB361437 taxid=293883;   | C.A  | TTA             | G.ATATCGAG   |                         | CG     | CA                     | CT.C    | T     |
| AF036603 taxid=70239;    |      | CTTAG           | .CG.TGT      |                         | CA     | CA                     | C       | T     |
| FJ969141.1 Stenonchulus  | C    | ACTG            | TTA.TGC      |                         | CA     | C                      | CA      | T     |

LC107877 taxid=539210;  
 LC095813 taxid=1752120;  
 KC206040 taxid=446301;  
 18S-Pa Plectus acuminat  
 KU180671 taxid=293684;  
 18S-An Acrobeloides nan  
 EU306344.1 Acrobeloides  
 18S-C Cephalobus sp  
 AF202152.1 Cervidellus  
 AY284668.1 Heterocephal  
 18S-Hb Heterorhabditis\_  
 AF202156.2 Halicephalob  
 KC522707.1 Panagrolaimu  
 AY268117.1 Caenorhabdit  
 AF082999.2 Distolabrell  
 18S-Rb Mesorhabditis be  
 18S-Ot Oscheius-tipulae  
 AF083015.1 Teratorhabdi  
 18S-Sf Steinernema felt  
 AY284686.1 Metateratoce  
 AY284683.1 Teratocephal  
 18S-Dd Ditylenchus dips  
 AB368535 taxid=400731;  
 18S-Bx Bursaphelenchus\_  
 AB368532 taxid=483518;  
 18S-Cr Mesocriconema sp  
 KJ934161 taxid=1542464;  
 EF025336 taxid=411803;  
 JQ771537.1 Neodolichodo  
 JQ446376.1 Hemicaloosia  
 EU306341.1 Hemicycclioph  
 KJ869397.1 Helicotylenc  
 AY284609.1 Rotylenchus  
 18S-Mi Meloidogyne inco  
 EU306351 taxid=364564;  
 EU306350.1 Nagelus obsc  
 KP966493.1 Paratylenchu  
 18S-Par Paratylenchus s  
 EF029855 taxid=406317;  
 18S-Pp Pratylenchus pen  
 JQ957898.1 Deladenus du  
 AB250212.1 Sphaerularia  
 FJ969144.1 Trophurus im  
 EU306352 taxid=293578;  
 FJ969113 taxid=312543;  
 AY284591.1 Filenchus th  
 KJ869373.1 Tylenchus na  
 AY284812 taxid=288453;  
 AY284809.1 Paraxonchium  
 EF207248.1 Mesodorylaim  
 AJ966513.1 Wilsonema sc  
 JX445118 taxid=1309579;  
 EF207249.1 Xiphinema in  
 AJ966472 taxid=344372;  
 AY284807 taxid=288432;  
 EF207253 taxid=288458;  
 KF583882.1 Mermis nigre  
 CAQS01000365 taxid=1365  
 AJ966474 taxid=288489;  
 AY552973 taxid=268226;  
 AB361437 taxid=293883;  
 AF036603 taxid=70239;  
 FJ969141.1 Stenonchulus  
 FJ969141.1 Stenonchulus



1610 1620 1630 1640 1650 1660 1670 1680

LC107877 *taxid=539210*; CCGAAAGGC TTGGGCAACCATCTGAAATCTTCGGTATCGGGATAGGGGATTGCAATTATTTCCCTTCAACGAGGAAT  
LC095813 *taxid=1752120*; T.....C.T.....A.C.....A.AG.A.....A.....A.....  
KC206040 *taxid=446301*; T.....A.T.T.A.CC.C.....C.A.....T.....C.A.....G.....  
18S-Pa *Plectus acuminat* T.....A.T.T.A.CCA.T.....C.A.....T.....C.A.....G.....  
KU180671 *taxid=293684*; T.....G.A.T.T.A.CCA.....T.G.....C.T.....C.AA.....T.G.G.....  
18S-An *Acrobeloides nan* T.....G.A.T.T.A.CCA.....T.G.....C.T.....C.AA.....T.G.G.....  
EU306344.1 *Acrobeloides* T.....G.A.T.T.A.CCA.....T.G.....C.T.....C.AA.....T.G.G.....  
18S-C *Cephalobus* sp T.....G.A.T.T.A.CCA.....T.G.....C.T.....C.AA.....T.G.G.....  
AF202152.1 *Cervidellus* T.....AG.A.A.T.A.CCA.....T.G.....C.T.....C.AA.....T.G.G.....  
AY284668.1 *Heterocephal* T.....G.A.T.T.A.CCA.....T.G.....C.T.....C.AA.....T.G.G.....  
18S-Hb *Heterorhabditis* .....T.A.T.T.A.CGT.....C.....C.....A.....T.....G.....  
AF202156.2 *Halicephalob* TT.....AT.....TT.A.G.G.T..T.A.....CAT.T.....C.AA.C.T...G...T.G.G.....C  
KC522707.1 *Panagrolaimu* .T...A.A...T.T.A.GAG.C...T.A.....AT.T.....CAAT.....T.....ATT.G.G.....C  
AY268117.1 *Caenorhabdit* .....T.A.C.T.A.CGT...T...A.TC.....T.....T.....G...A.....  
AF082999.2 *Distolabrell* .....G.TCA.T.T.A.CAT.....GAC.....T.....C.....G.....  
18S-Rb *Mesorhabditis* be .....G.TCACT..T.A.CGT.....GA.....A.....G.....  
18S-Ot *Oscheius tipulae* .....TCA.T.T.A.CGT.....GGAC.....C...A.....C.....G.....  
AF083015.1 *Teratorhabdi* T.....A.A.T.T.T.C.T.....CT..T...C.T.....T.A.....T.....A.A.....  
18S-Sf *Steinernema felt* T.....T.A.T.T.A.CGA.C...TC.....C.A.....G.....  
AY284686.1 *Metaterratoce* .....A.T.T.A.CCT.....C.....C.A.....G.....  
AY284683.1 *Teratocephal* T.....AG.C.T.T.A.CAA.....T.G.....T.....C.AA.....T.G.G.....  
18S-Dd *Ditylenchus dips* .....G...G.A.T.....A.GT...G.TAT.ATTT.TCT.A.T.A.TG...A...T.CC.T.A.G.....  
AB368535 *taxid=400731*; ...C...A.A.T...A.GT...G.TAT.ATTA.GCT.A.T.A.TG...A...T.C.T.A.G.....  
18S-Bx *Bursaphelenchus* .....A.A.T...A.GT...G.TAT.ATTA.GCT.A.T.A.AG...A...T.C.T.A.A.....  
AB368532 *taxid=483518*; .....A.GCC.T.A.CCT.....T.G.....T.....C.AA.....T.G.G.....  
18S-Cr *Mesocriconema* sp KJ934161 *taxid=1542464*; .....A.GCC.T.A.CCT.....T.G.....T.....C.AA.....T.G.G.....  
EF025336 *taxid=411803*; .....G...GC..T.A.CCT.....T.G.....T.....C.A.....G.G.....  
JQ771537.1 *Neodolichodo* .....G.G.T.T.A.CGG...C.T.G.....T.....C.AC.....GT.G.G.....  
JQ446376.1 *Hemicaloosia* .....A.GCT.T.A.CCT.....T.G.....T.....C.AA.....T.G.G.....  
EU306341.1 *Hemicyclioph* .....A.GCC.T.A.CCT.....T.G.....T.....C.AA.....T.G.G.....  
KJ869397.1 *Helicotylenc* .....G.G.T.T.A.CCG.....T.G.....T...G.C.AC.....GT.G.G.....  
AY284609.1 *Rotylenchus* .....G.G.T.T.A.CCG.....T.G.....T.....C.AC.....GT.G.G.....  
18S-Mi *Meloidogyne inco* .T.....G.GC..T.A.CAT.....T.G.....T.....C.AA.....T.G.G.....  
EU306351 *taxid=364564*; .....G.A.T.T.A.CAT.....T.G.....T.....T.AA.....T.G.G.....  
EU306350.1 *Nagelus obsc* .....G.A.T.T.A.CAT.....T.G.....T.....T.AA.....T.G.G.....  
KP966493.1 *Paratylenchu* .....A.GC..T.A.CCT.....T.G.....T.....C.AA.....T.G.G.....  
18S-Par *Paratylenchus* s .....A.GCC.T.A.CCT.....T.G.....T.....C.AA.....T.G.G.....  
EF029855 *taxid=406317*; .....G.CAT.T.A.CCT.....T.G.....T.....C.AA.....T.G.G.....  
18S-Pp *Pratylenchus pen* .....C.T.T.A.CAT.....T.T.G.....T.....C.AA.....T.G.G.....  
JQ957898.1 *Deladenus du* TT.....AG.A.T.T.A.CGAG...G.T.GT...T.....C.A.....T.TG.G.....  
AB250212.1 *Sphaerularia* T.....G.A.T.T.A.CCT.....T.G.....T.....T.AA.....T.G.G.....  
FJ969144.1 *Trophurus im* .....G.G.T.T.A.CCT.....T.G.....T.....C.AA.....T.G.G.....  
EU306352 *taxid=293578*; .....G.G.T.T.A.CCT.....T.G.....T.....C.AA.....T.G.G.....N  
FJ969113 *taxid=312543*; T.....G.A.T.T.A.CAT.....TCG.....T.....C.AA.....T.G.G.....  
AY284591.1 *Filenchus th* T.....G.A.T.T.A.CAT.....T.G.....CT.....C.AA.....T.G.G.....  
KJ869373.1 *Tylenchus na* T.....A.CA...T.A.CG...CG.....T.....C.AA...A.....T.G.G.....  
AY284812 *taxid=288453*; T.G...AA-CC..T...CAAGT..T...T...C.T.....A.....A.....  
AY284809.1 *Paraxonchium* T.G...A.C...T...CAAGT..T...T...C.T.....A.....A.....  
EF207248.1 *Mesodorylaim* .....G...A-CC..T...CAAGT..T...T...C.T.....A.....A.....  
AJ966513.1 *Wilsonema* sc T.....A.T.T.A.CC.C...C.A.....T.....C.A.....G.....  
JX445118 *taxid=1309579*; T.G...AA-CC..T...C.AGC..T...T...C.T.....A.....G.....  
EF207249.1 *Xiphinema in* T.GT.AA-CC..T...C.AGC..T...T...C.T.....A.....A.....  
AJ966472 *taxid=344372*; ..G...A-CC..T...CAAGT..T...T...C.T.....A.....A.....  
AY284807 *taxid=288432*; .....G...A.C...T...CAAGT..T...T...C.T.....A.....A.....  
EF207253 *taxid=288458*; T.G...A-CC..T...CAAGT..T...T...C.T.....A.....A.....  
KF583882.1 *Mermis nigre* .T.G..A.A.C.T..G..A.--AC...TCAT..T...C.T...C...A.....G.....  
CAQS01000365 *taxid=1365* .T.GG.A.A-C.C.T..T..T.--AC...TTAT..T...C.T...C...C...G.....G.....  
AJ966474 *taxid=288489*; .T.GT.A.A.A.T..T..A.--AC...TAT..T...C.T.....G.....A.....  
AY552973 *taxid=268226*; .T.GT.A.A.A.T..T..A.--AC...TAT..T...C.A.....A.....G.....A.....  
AB361437 *taxid=293883*; .T.G..A.T.A.T..T..A.--GC...TAT..T...T.....G.....G.....  
AF036603 *taxid=70239*; .....G..C.A.T...CGT...C.C.T.....A.....G.....  
FJ969141.1 *Stenonchulus* T.GC...A.C.T.T...GT...C.C.T...C.T.....A.....G.....

|                          | 1690                                              | 1700                                        | 1710 | 1720 | 1730 | 1740 | 1750 | 1760   |
|--------------------------|---------------------------------------------------|---------------------------------------------|------|------|------|------|------|--------|
| LC107877 taxid=539210;   | TCCCAGTAAGTGTGAGTCATCAGCTCGCGTTGATTACG            | TCCCTGCCCTTTGTACACACCGCCCCGTCGCTGCCCGGGACTG |      |      |      |      |      |        |
| LC095813 taxid=1752120;  | .....A.....ATTC.....                              |                                             |      |      |      |      |      |        |
| KC206040 taxid=446301;   | .....G.....A.....                                 |                                             |      |      |      |      |      |        |
| 18S-Pa_Plectus_acuminat  | .....G.....A.....                                 |                                             |      |      |      |      |      |        |
| KU180671 taxid=293684;   | ..A.....C.....A.....TC.....                       |                                             |      |      |      |      |      |        |
| 18S-An_Acrobeloides_nan  | ..A.....C.....A.....TC.....                       |                                             |      |      |      |      |      |        |
| EU306344.1 Acrobeloides  | ..A.....C.....A.....TC.....                       |                                             |      |      |      |      |      |        |
| 18S-C Cephalobus_sp      | ..A.....C.....A.....TC.....                       |                                             |      |      |      |      |      |        |
| AF202152.1 Cervidellus   | ..A.....C.....A.....TC.....                       |                                             |      |      |      |      |      |        |
| AY284668.1 Heterocephal  | ..A.....C.....A.....TC.....                       |                                             |      |      |      |      |      |        |
| 18S-Hb_Heterorhabditis   | ..T.....A.....                                    |                                             |      |      |      |      |      | T..... |
| AF202156.2 Halicephalob  | ..T.A.....T.....T.....G.A.C.....T.T.....TA.A..... |                                             |      |      |      |      |      |        |
| KC522707.1 Panagrolaimu  | ..T.A.....A.....TA.C.....T.....A.....             |                                             |      |      |      |      |      |        |
| AY268117.1 Caenorhabdit  | G..T.....A.....AT.....                            |                                             |      |      |      |      |      |        |
| AF082999.2 Distolabrell  | ..T.....T.....TC.T.A.....GA.....A.....            |                                             |      |      |      |      |      |        |
| 18S-Rb_Mesorhabditis_be  | ..T.....T.....TC.T.A.....GA.....A.....            |                                             |      |      |      |      |      |        |
| 18S-Ot_Oscheius-tipulae  |                                                   |                                             |      |      |      |      |      |        |
| AF083015.1 Teratorhabdi  | ..T.....T.....T.T.A.....GA.....A.....             |                                             |      |      |      |      |      |        |
| 18S-Sf_Steinerinema_felt | ..T.....CA.....A.T.....                           |                                             |      |      |      |      |      |        |
| AY284686.1 Metateratoce  | .....G.....A.C.....                               |                                             |      |      |      |      |      |        |
| AY284683.1 Teratocephal  | .....A.....                                       |                                             |      |      |      |      |      |        |
| 18S-Dd_Ditylenchus_dips  | ..A.....A.C.....A.....                            |                                             |      |      |      |      |      |        |
| AB368535 taxid=400731;   | ..A.....A.C.....A.T.A.....                        |                                             |      |      |      |      |      |        |
| 18S-Bx_Bursaphelenchus   | ..A.....A.....T.A.T.A.....                        |                                             |      |      |      |      |      |        |
| AB368532 taxid=483518;   | ..A.....A.C.....A.....A.....                      |                                             |      |      |      |      |      |        |
| 18S-Cr_Mesocriconeuma_sp | ..T.....C.....TA.A.....                           |                                             |      |      |      |      |      |        |
| KJ934161 taxid=1542464;  | ..T.....C.....TA.A.....                           |                                             |      |      |      |      |      |        |
| EF025336 taxid=411803;   | ..A.....CC.....G.....                             |                                             |      |      |      |      |      |        |
| JQ771537.1 Neodolichodo  | ..TT...G.G.C.....A.....CCC.A.....T...T...         |                                             |      |      |      |      |      |        |
| JQ446376.1 Hemicaloosia  | ..T.....C.....TA.A.....                           |                                             |      |      |      |      |      |        |
| EU306341.1 Hemicyclioph  | ..T.....TA.A.....                                 |                                             |      |      |      |      |      |        |
| KJ869397.1 Helicotylenc  | ..TT...G.G.C.....A.....TC.A.....                  |                                             |      |      |      |      |      |        |
| AY284609.1 Rotylenchus   | ..TT...G.G.C.....A.....TC.A.....                  |                                             |      |      |      |      |      |        |
| 18S-Mi_Meloidogyne_inco  | ..A.....C.....                                    |                                             |      |      |      |      |      |        |
| EU306351 taxid=364564;   | ..A.....C.....A.....                              |                                             |      |      |      |      |      |        |
| EU306350.1 Nagelus_obsc  | ..A.....C.....A.....                              |                                             |      |      |      |      |      |        |
| KP966493.1 Paratylenchu  | ..A.....C.....TA.A.....                           |                                             |      |      |      |      |      |        |
| 18S-Par_Paratylenchus_s  | ..A.....C.....TA.A.....                           |                                             |      |      |      |      |      |        |
| EF029855 taxid=406317;   | ..A.....C.T.....A.A.....A.....                    |                                             |      |      |      |      |      |        |
| 18S-Pp_Pratylenchus_pen  | ..A.....C.....A.....                              |                                             |      |      |      |      |      |        |
| JQ957898.1 Deladenus_du  | ..A.....A.....T.A.....                            |                                             |      |      |      |      |      |        |
| AB250212.1 Sphaerularia  | ..A.....C.....A.....                              |                                             |      |      |      |      |      |        |
| FJ969144.1 Trophurus_im  | ..A.....C.....A.T.....                            |                                             |      |      |      |      |      |        |
| EU306352 taxid=293578;   | ..A.....C.....A.....T.....N.....A.....            |                                             |      |      |      |      |      |        |
| FJ969113 taxid=312543;   | ..A.....C.....A.....A.....                        |                                             |      |      |      |      |      |        |
| AY284591.1 Filenchus_th  | ..A.....C.....A.....A.....                        |                                             |      |      |      |      |      |        |
| KJ869373.1 Tylenchus_na  | ..A.....C.....T.A.....A.....                      |                                             |      |      |      |      |      |        |
| AY284812 taxid=288453;   | .....A.C.G.....A.....A.TACC..T..                  |                                             |      |      |      |      |      |        |
| AY284809.1 Paraxonchium  | .....A.C.G.....A.....A.TACC..T..                  |                                             |      |      |      |      |      |        |
| EF207248.1 Mesodorylaim  | .....A.C.G.....A.....A.TACC..T..                  |                                             |      |      |      |      |      |        |
| AJ966513.1 Wilsonema_sc  | .....G.....A.....                                 |                                             |      |      |      |      |      |        |
| JX445118 taxid=1309579;  | .....A.C.G.....A.....A.TACC..T..                  |                                             |      |      |      |      |      |        |
| EF207249.1 Xiphinema_in  | .....A.C.G.....A.....A.TACC..T..                  |                                             |      |      |      |      |      |        |
| AJ966472 taxid=344372;   | .....A.C.G.....A.....A.TACC..T..                  |                                             |      |      |      |      |      |        |
| AY284807 taxid=288432;   | .....A.C.G.....A.....A.TACC..T..                  |                                             |      |      |      |      |      |        |
| EF207253 taxid=288458;   | .....A.C.G.....A.....A.TACC..T..                  |                                             |      |      |      |      |      |        |
| KF583882.1 Mermis_nigre  | ..T.T.....C.....A.....A.TACC..T..                 |                                             |      |      |      |      |      |        |
| CAQ801000365 taxid=1365  | AT.T.....C.....A.....A.TACC..T..                  |                                             |      |      |      |      |      |        |
| AJ966474 taxid=288489;   | .....CA.....A.....T.....A.TACC..T..               |                                             |      |      |      |      |      |        |
| AY552973 taxid=268226;   | .....CA.....T.....T.....                          |                                             |      |      |      |      |      |        |
| AB361437 taxid=293883;   | .....A.TC.....A.....A.TACC..T..                   |                                             |      |      |      |      |      |        |
| AF036603 taxid=70239;    | .....C.G.....C.....A.TACC..T..                    |                                             |      |      |      |      |      |        |
| FJ969141.1 Stenonchulus  | .....C.G.....A.TACC..T..                          |                                             |      |      |      |      |      |        |

|                           | 1770                                                                 | 1780 | 1790 | 1800 | 1810 | 1820                          | 1830          | 1840 |
|---------------------------|----------------------------------------------------------------------|------|------|------|------|-------------------------------|---------------|------|
| LC107877 taxid=539210;    | AGTTGCTTCGAGAAATGCGAGGACCGTCCTGTTGGCGTTA                             |      |      |      |      | AACCCATCTGTGACAGG             | AAACGC        |      |
| LC095813 taxid=1752120;   | .....G..T.G...T..TGT..C...G.C.T                                      |      |      |      |      | GT.T.TGTA.C..TG.A..C.AT       |               |      |
| KC206040 taxid=446301;    | ..CC.T.....A...G...T.CTG...CG..GC..TC                                |      |      |      |      | GGGC.TTGG..TC.GTG.A..C...     |               |      |
| 18S-Pa_Plectus_acuminat   | ..CC.T.....A...G...CTG...CG..GC..TC                                  |      |      |      |      | GGGC.TTGG..TC.GTG.A..C...     |               |      |
| KU180671 taxid=293684;    | ..CCAT.....GAY.AG...T.GTGGACCG.A..C.TCTT                             |      |      |      |      | CGG.TGTTCCG.TC.TTG.A..CT.G    |               |      |
| 18S-An_Acrobelloides_nan  | ..CCAT.....GAT.AG...T.GTGGAC.G...CCTCTT                              |      |      |      |      | CGG.GGT.CGG.TC.CTG.A..CT.A    |               |      |
| EU306344.1 Acrobelloides  | ..CCAT.....GAT.AG...T.GTGGAC.G...CCTCTT                              |      |      |      |      | CGG.GGT.CGG.TC.CTG.A..CT.A    |               |      |
| 18S-C_Cephalobus_sp       | ..CCAT.....GAT.AG...T.GTGGAC.G...CCTCTT                              |      |      |      |      | CGG.GGT.CGG.TC.CTG.A..CT.A    |               |      |
| AF202152.1 Cervidellus    | ..CCAT.....GAT.AG...T.GTGGAC.G.A..CCTCTT                             |      |      |      |      | CGG.GGT.CGG.TC                |               |      |
| AY284668.1 Heterocephal   | ..CCAT.....GAT.AG...T.AGG.GC.G...C.TTTT                              |      |      |      |      | CGG.TGT.CGG..TTTGAA..CT.A     |               |      |
| 18S-Hb_Heterorhabditis    | ..C..T.....GAT.GA...T.CTGTAT.GG..T..CG                               |      |      |      |      | GGCT..TGG.A..TG.A..C.AT       |               |      |
| AF202156.2 Halicephalob   | .....A.....GATG.GA..GA..ATA.A.G.ATGAAAGTATATATGTTTCG                 |      |      |      |      |                               |               |      |
| KC522707.1 Panagrolaimu   | G...AA.....GATT...TT..TTG.TA..AT.T.CTTTAC                            |      |      |      |      | GG..AAT.ATAACAGAT.AA..T.AA    | T             |      |
| AY268117.1 Caenorhabdit   | ..AC..A.....GA.T.G...T...G..TCGA..TT.A.C                             |      |      |      |      | GACT..TCGT..TG.G.A..C.AT      |               |      |
| AF082999.2 Distolabrell   | ..ACC.T.....GAT.AG...T.GT.CACG..AC..GT                               |      |      |      |      | TCCT..TG.GA..TTG.A..CT.G      |               |      |
| 18S-Rb_Mesorhabditis_be   | ..ACC.T.....C.AG...A..GT.CGCG..AC..GT                                |      |      |      |      | TCCT..TGCGA...GTG..CT.G       |               |      |
| 18S-Ot_Oscheius-tipulae   |                                                                      |      |      |      |      |                               |               |      |
| AF083015.1 Teratorhabdi   | ..ACC.T.....C.AG...A..G.CCGCC..GT.CGC                                |      |      |      |      | CTG..TGCGA...GTG..CT.G        |               |      |
| 18S-Sf_Steinerinema_felt  | .....T.....A...GA...T.CTG..C.GA.CG.TC                                |      |      |      |      | GG..CGATCGT..C.G.GA..C...     |               |      |
| AY284686.1 Metateratoce   | ..CC.T.....A...G...CTGA...CG..TC..TC                                 |      |      |      |      | GGG..TTGG.ATC.GTG.A..C...     |               |      |
| AY284683.1 Teratocephal   | ..CC.T.....A...G...CTG..TCGG..C..TC                                  |      |      |      |      | GGGG.T.TGA.T..GTC.AG..C...    |               |      |
| 18S-Dd_Ditylenchus_dips   | ..CCAT.....T..G...TT.C.GA.TAGC...CCTTTC                              |      |      |      |      | GGG.TTGG.T.T.T.GTGA..C.AA     |               |      |
| AB368535 taxid=400731;    | G...A.....GCTAG...T..TGA...C.AT.GCTT                                 |      |      |      |      | GCCATTG..TC..TGA..CGAG        |               |      |
| 18S-Bx_Bursaphelenchus    | .....A.....ACTAG...T..CTGGA...C.AT..TC                               |      |      |      |      | GGCATTG...T..GTGA..CTAG       |               |      |
| AB368532 taxid=483518;    | G...A.C.....ACTAG...T..T..G...A.TA..TC                               |      |      |      |      | GGTA.TGG.C.C..TGA..CGAG       |               |      |
| 18S-Cr_Mesocriconeuma_sp  | ..CCAT.....TATTCG...T..TGG.TGCGT.TC..TC                              |      |      |      |      | GGGAC.TG.C..C.GCCAGA..CGAA    |               |      |
| KJ934161 taxid=1542464;   | ..CCAT.....TATTCG...T..CTGG.TAGCA.TCC.TC                             |      |      |      |      | GGGGC..G.C...GC.AGA..CGAA     |               |      |
| EF025336 taxid=411803;    | G.CCA.....TCTT...T..TGA.C.GCC.TT.GTTGTTTCGACGCGCT.GGCGGAT..TGC..T..A |      |      |      |      |                               |               |      |
| JQ771537.1 Neodolichodo   | ..CCAT.....CT..G...                                                  |      |      |      |      |                               |               |      |
| JQ446376.1 Hemicaloosia   | ..CCAT.....TAT.CG...T..CTGG.TGCAC..C..TC                             |      |      |      |      | GGGGCGAG.C...GCCTGA..CG.A     |               |      |
| EU306341.1 Hemicyclospira | ..CCAT.....TATTCG...T..CTGG.TGCG..TTC.TCA                            |      |      |      |      | CGGGAC..G.C...GCT.GA..CGAA    |               |      |
| KJ869397.1 Helicotylenc   | ..CCAT.....CT..G...TT..TGG.C.GGTTGCC.CCG                             |      |      |      |      | GGTTG.CGT.CCTT.GA..C..A       |               |      |
| AY284609.1 Rotylenchus    | ..CCAT.....CTT.G...AG.GACT.GAC.GC..TCG                               |      |      |      |      | GGC.G.C..GT..CTG.A..C.AA      |               |      |
| 18S-Mi_Meloidogyne_inco   | ..CCAT.....TT.G...TTG...TAAT..TTCT                                   |      |      |      |      | AA..ATTA..T..TG.A..C.AA       |               |      |
| EU306351 taxid=364564;    | ..CCAT.....CTT.G...TT.CTGG.CGGG...CTTT                               |      |      |      |      | CGGGT.TTCCT.CC.GTGAA..C.AA    |               |      |
| EU306350.1 Nagelus_obsc   | ..CCAT.....CTT.G...TT.CTGG.CGGG...CTCT                               |      |      |      |      | CGGGT.TTCCT.CC.GTGAA..C.AA    |               |      |
| KP966493.1 Paratylenchu   | ..CCAT.....TATTCG...T..CTGGCCG..C..C..TC                             |      |      |      |      | GGGGTTT.GG.C.GC.AGA..CGAA     |               |      |
| 18S-Par_Pratylenchus_s    | ..CCAT.....TATTCG...T..CTGGCCG..C..C..CTC                            |      |      |      |      | GGGGTTT.GG.C.GC.AGA..CGAA     |               |      |
| EF029855 taxid=406317;    | ..CC.T.....T.G...ACTGG...A.T.A.CCCTCG                                |      |      |      |      | GGCGCTGTGC.C.G.T.G.A..C.A     |               |      |
| 18S-Pp_Pratylenchus_pen   | ..ACAT.....CTT.G...TGA..                                             |      |      |      |      |                               |               |      |
| JQ957898.1 Deladenus_du   | ..CCAT.....TT.G...TT.CTGA.CGAC..TC..TC                               |      |      |      |      | GGG.TTGTCT.T..GTGAA..C.AG     |               |      |
| AB250212.1 Sphaerularia   | ..CCAT.....CTT.G...T..CTGA.TG.A...CTTTC                              |      |      |      |      | GGGG..TGGCT.T..GTGA..C.AA     |               |      |
| FJ969144.1 Trophurus_im   | ..CCAT.....CTT.G...CTGA.CCGGC.T.CCTTCA                               |      |      |      |      | CGGGC.A.CGT.T..GTG.A..C.AA    |               |      |
| EU306352 taxid=293578;    | ..CCAT.....CT..G...CTGA.CCGGC..AC.TTC                                |      |      |      |      | GGGC.G.CGTNTC.GTG.A..C..A     |               |      |
| FJ969113 taxid=312543;    | ..CCAT.....TT.G...TT.CTGA.TAGC...GTCTTT                              |      |      |      |      | CGGG.TTGC.T.TC.GTGAA..C.AA    |               |      |
| AY284591.1 Filenchus_th   | ..CCAT.....TT.G...TT.C.GA.TAG...CCGCA                                |      |      |      |      | AGGG.TTGC.T.TC.GTGAA..C.AA    |               |      |
| KJ869373.1 Tylenchus_na   | ...AT.....TT...T..GTGGGT.G..TG..GCCTTC                               |      |      |      |      | GGGTG.TGCCACTC.T.GA..T.AA     |               |      |
| AY284812 taxid=288453;    | GA.GA...A.T..GG.CTT...AGGTAAGGT..T.GTAATG                            |      |      |      |      | AGTG.TTT.GCT..TTG.AA.TTT.A    |               |      |
| AY284809.1 Paraxonchium   | GA.GA...A.T..GG..TT...AGGTAAGGT..CCG.AA.G                            |      |      |      |      | GGTG.TTT.GCT..TTG.AA.TTT.A    |               |      |
| EF207248.1 Mesodorylaim   | GA.GA...A.T..GG.CTT...AGGTAAGGT..C.GTAATG                            |      |      |      |      | GGTG.TTT.GCT..TTG.AA.TTT.A    |               |      |
| AJ966513.1 Wilsonema_sc   | ..CC.T.....A...G...T.CTG...CG..A..TC                                 |      |      |      |      | GGCT.TTGG..TC.GTG.A..C...     |               |      |
| JX445118 taxid=1309579;   | GA.GA...A.T..GG.CTT...AGGTAT.GA..T..TTATT                            |      |      |      |      | AGTT..AT.GCT..TTG.AA.TTT.A    |               |      |
| EF207249.1 Xiphinema_in   | GA.GA...A.T..GG.CTT...AG..GAAGGT..C..TAACG                           |      |      |      |      | GGTG..T.CG.T..TTG.AA.TTT.A    |               |      |
| AJ966472 taxid=344372;    | GA.GA...A.T..GG.CTT...AGGTA.AGGT..T..TAACG                           |      |      |      |      | AGTG.TTT.GCT..TTG.AA.TTT.A    |               |      |
| AY284807 taxid=288432;    | GA.GA...A.T..GG.CTT...AGGTAAGGT..C.GTAATG                            |      |      |      |      | GGTG.TTT.GCT..TTG.AA.TTT.A    |               |      |
| EF207253 taxid=288458;    | GA.GA...A.T..GG.CTT...AGGTAAGGT..T..TAACG                            |      |      |      |      | AGTG.TTT.GCT..TTG.AA.TTT.A    |               |      |
| KF583882.1 Mermis_nigre   | GAAGAT.CGAT..G.ACTTT...T.GGCG..AAGT.GCC..AA.A                        |      |      |      |      | AACCG.T.CACTGCCG.TA.AA.G.T.T  |               |      |
| CAQ801000365 taxid=1365   | GAAG.T.CA.T...CA.AT...T..GT.CAGGGT.GCCC.GTCA                         |      |      |      |      | AACGGT..CT.TG.TTCACGGG.A.TGCG |               |      |
| AJ966474 taxid=288489;    | GAAGAT..A.T...T.CTTC...T.GACTC.AAGT.ATG..AAA                         |      |      |      |      | AGTCG.T.CGA.ATT.G.AA.G.T..    |               |      |
| AY552973 taxid=268226;    |                                                                      |      |      |      |      |                               |               |      |
| AB361437 taxid=293883;    | GAACAT.G..T..G..CTTC...T.A.GTC.AAAC.AACGTAAAA                        |      |      |      |      | ATTCGATTCGC.C.TTG.AA.G.T..    |               |      |
| AF036603 taxid=70239;     | GAAGTAGA...GG.CTCG...T..ATT.CTGGGCTGCC..TCC                          |      |      |      |      | GGT.G..CAGGACATTGA.A.CTT.A    |               |      |
| FJ969141.1 Stenonchulus   | GA.GTT..ATT..GG.CTTC...T.CTGGC.AGGTCAC.C.GTC                         |      |      |      |      | A                             | AGTG.AA.G.T.A |      |

LC107877 taxid=539210; CTTAATCGCAGTGGCTT  
LC095813 taxid=1752120; A.....  
KC206040 taxid=446301; T.....GAACCGGGCAAAGTCGTAAACAAGGTTTCCGTAG  
18S-Pa Plectus acuminat T.....GAACCGGGCAA  
KU180671 taxid=293684; T..G.....GAACCGGGCAAAGTCGTAAACAAGGTAGCC  
18S-An Acrobelloides nan T..G.....GAACCGGGCAA  
EU306344.1 Acrobelloides T..G.....GAACCGGGCAAAGTCGTAAACAAGGTAGCCGTAGGTGAACCTGCCGTGGATCATTA  
18S-C Cephalobus sp T..G.....GAACCGGGCAA  
AF202152.1 Cervidellus  
AY284668.1 Heterocephal T..G.....GAACCGGGC  
18S-Hb Heterorhabditis T.....A.....GAACCGGGCAAAG  
AF202156.2 Halicephalob  
KC522707.1 Panagrolaimu T..G.....T.....GAACCGGGCAAAA  
AY268117.1 Caenorhabdit T..T.....T..T..GAACCGGGTAAAAAGTCGTAAACAAGGTAGCTGTAGGTGAACCTGCAGCAGGATCA  
AF082999.2 Distolabrell ..G.....GAC..T..GAACCGGGTAAAAAGTCGTAAACAAGGTACC GG TAG  
18S-Rb Mesorhabditis be ..G.....GAC..T..GAACCGGGTA  
18S-Ot Oscheius-tipulae .G.G.....GAC..T..GAACCGGGTAAAAAGTCGTAAACAAGGTACC GG TAGGTGAACCTGCAGC  
AF083015.1 Teratorhabdi G.....A.AC.....GAACCGGGCAA  
18S-Sf Steinernema felt .....GAACCGGGC  
AY284686.1 Metateratoce .....C.....GAACCGGGC  
AY284683.1 Teratocephal .....GAACCGGGCA  
18S-Dd Ditylenchus dips T.....C.GAACCGGGCAAAGTCGTAAACAAGGTAGCCGTAG  
AB368535 taxid=400731; T.....GAACCGG CA  
18S-Bx Bursaphelenchus T.....G.....C.GAACCGGGCAAAGTCGTAAACAAGGTAGCCGTAG  
AB368532 taxid=483518; .G.....A.....GAACCGGGCA  
18S-Cr Mesocriconema sp .G.....GAACCGGGCAAAGTCGTAAACAAGGTAGCTGTAGGTGAACCTGCTGCTG  
KJ934161 taxid=1542464; TG.G...T.....GAACCGGGC  
EF025336 taxid=411803;  
JQ771537.1 Neodolichodo .G.....GAACCGGGCAAAGTCGTAAACAAGGTAGCTGTAGGTGAACCTGCTGCTGGATCATTA CCTCGT  
JQ446376.1 Hemicaloosia .G.....GAACCGGGCAAAGTCGTAAACAAGGTAGCTGTAGGTGAACCTGCAGCAGGATCA  
EU306341.1 Hemicyclioph T.....GAACCGGGC  
KJ869397.1 Helicotylenc T.....GAACCGGGC  
AY284609.1 Rotylenchus T.....GAACCGGGCA  
18S-Mi Meloidogyne\_inco T.....GAACCGGGCAAAGTCGTAAACAAGGTGGCTGTAGGTGAACCTGCAGNAG  
EU306351 taxid=364564; T.....GAACCGGGCAAAGTCGTAAACAAGGTGGCTGTAGGTGAACCTGCAGATGGATCAAGGACGG  
EU306350.1 Nagelus obsc T.....GAACCGGGCAAAGTCGTAAACAAGGTGGCTGTAGGTGAACCTGCAGATGGATCAAGGACGG  
KP966493.1 Paratylenchu .G..TAAA..TG.....GAACCGGGG  
18S-Par Paratylenchus\_s .G.....GAACCGGC  
EF029855 taxid=406317; .....GCC..T..GAACCGGGT  
18S-Pp Pratylenchus pen  
JQ957898.1 Deladenus du .....T.....T.....GAACCGGGC  
AB250212.1 Sphaerularia T.....GAACCGGGCAAAGTCGTAAACAAGGTGGCTGTAG  
FJ969144.1 Trophurus im T.....CGAACCGGGCAAAGTCGTAAACAAGGTAGC  
EU306352 taxid=293578; T.....GAACCGGGTAAAAAGTCGTAAACAAGGTAGCTGTAGGTGAACCTGCAG  
FJ969113 taxid=312543; .....A.....GAACCGGGTAAAAAGTCGTAAACAAGGTAGC  
AY284591.1 Filenchus th T.....A.....GAACCGGGT  
KJ869373.1 Tylenchus na .....AGA.....GAACCGGGT  
AY284812 taxid=288453; TCG..CTA..TATC.AGAGGAAGT  
AY284809.1 Paraxonchium TCG..CTA.T..TATC.AGAGGAAGT  
EF207248.1 Mesodorylaim TCG..CTA..TATC.AGAGGAAGT  
AJ966513.1 Wilsonema sc T.....GAACCGGGCAAAGTCGTAAACAAGGTTTCCGTAGGTGAACCTGCAG  
JX445118 taxid=1309579; TCG..CTA..  
EF207249.1 Xiphinema in TCG..CTAA..TATC.AGAGGAAGT  
AJ966472 taxid=344372; TCG..CTA..TATC.AGAGGAAGTAAAAAGTCGTAAACAAGGTTTCCGTAGGTGAACCTGCAG  
AY284807 taxid=288432; TCG..CTAT..TATC.AGAGGAAGT  
EF207253 taxid=288458; TCG..CTA..TATC.AGAGGAAGT  
KF583882.1 Mermis nigre TCA....T-A.CTTT.C.AGAGGAAGTAAAA  
CAQS01000365 taxid=1365 T.G..CT.T-CCCTT..AGAGGAAGTAAAAAGTCGTAAACAAGGTTTCCGTAGGTGAACCTGCAGGAG  
AJ966474 taxid=288489; A.G..C-AA-A.TTTT.C.AGAGGAAGTAAAAAGTCGTAAACAAGGTTTCCGTAGGTGAACCTGCAGGCTG  
AY552973 taxid=268226;  
AB361437 taxid=293883; TCG...GCA-AC.TTC.AGAGGAAGTAAAAAGTCGTAAACAAGGTTTCCGTAGGT  
AF036603 taxid=70239; -CT.....CTA.TTC.AGAGGAAGTAAAAAGTCGTAAACAAGGTTTCCGTAGGTGAACCTGC  
FJ969141.1 Stenonchulus .CC..GAT..AACAT..AGAGGAAGTAAAAAGTCGTAAACAAGGTAGC

|                          | 1930                                                                             | 1940 | 1950 | 1960 | 1970 | 1980 | 1990 | 2000 |
|--------------------------|----------------------------------------------------------------------------------|------|------|------|------|------|------|------|
|                          |                                                                                  |      |      |      |      |      |      |      |
| LC107877 taxid=539210;   | .....                                                                            |      |      |      |      |      |      |      |
| LC095813 taxid=1752120;  | .....                                                                            |      |      |      |      |      |      |      |
| KC206040 taxid=446301;   | .....                                                                            |      |      |      |      |      |      |      |
| 18S-Pa Plectus acuminat  | .....                                                                            |      |      |      |      |      |      |      |
| KU180671 taxid=293684;   | .....                                                                            |      |      |      |      |      |      |      |
| 18S-An Acrobeloides nan  | .....                                                                            |      |      |      |      |      |      |      |
| EU306344.1 Acrobeloides  | .....                                                                            |      |      |      |      |      |      |      |
| 18S-C Cephalobus sp      | .....                                                                            |      |      |      |      |      |      |      |
| AF202152.1 Cervidellus   | .....                                                                            |      |      |      |      |      |      |      |
| AY284668.1 Heterocephal  | .....                                                                            |      |      |      |      |      |      |      |
| 18S-Hb Heterorhabditis   | .....                                                                            |      |      |      |      |      |      |      |
| AF202156.2 Halicephalob  | .....                                                                            |      |      |      |      |      |      |      |
| KC522707.1 Panagrolaimu  | .....                                                                            |      |      |      |      |      |      |      |
| AY268117.1 Caenorhabdit  | .....                                                                            |      |      |      |      |      |      |      |
| AF082999.2 Distolabrell  | .....                                                                            |      |      |      |      |      |      |      |
| 18S-Rb Mesorhabditis be  | .....                                                                            |      |      |      |      |      |      |      |
| 18S-Ot Oscheius-tipulae  | .....                                                                            |      |      |      |      |      |      |      |
| AF083015.1 Teratorhabdi  | .....                                                                            |      |      |      |      |      |      |      |
| 18S-Sf Steinernema felt  | .....                                                                            |      |      |      |      |      |      |      |
| AY284686.1 Metateratoce  | .....                                                                            |      |      |      |      |      |      |      |
| AY284683.1 Teratocephal  | .....                                                                            |      |      |      |      |      |      |      |
| 18S-Dd Ditylenchus dips  | .....                                                                            |      |      |      |      |      |      |      |
| AB368535 taxid=400731;   | .....                                                                            |      |      |      |      |      |      |      |
| 18S-Bx Bursaphelenchus   | .....                                                                            |      |      |      |      |      |      |      |
| AB368532 taxid=483518;   | .....                                                                            |      |      |      |      |      |      |      |
| 18S-Cr Mesocriconema sp  | .....                                                                            |      |      |      |      |      |      |      |
| KJ934161 taxid=1542464;  | .....                                                                            |      |      |      |      |      |      |      |
| EF025336 taxid=411803;   | .....                                                                            |      |      |      |      |      |      |      |
| JQ771537.1 Neodolichodo  | .....                                                                            |      |      |      |      |      |      |      |
| JQ446376.1 Hemicaloosia  | CGCTACGACTTGCGATGATTGCCGGGACGGTTCGACCGACTTGTCGACC GGGTCCCGTCTCGGAGAGCTACGAGCGCCA |      |      |      |      |      |      |      |
| EU306341.1 Hemicycclioph | .....                                                                            |      |      |      |      |      |      |      |
| KJ869397.1 Helicotylenc  | .....                                                                            |      |      |      |      |      |      |      |
| AY284609.1 Rotylenchus   | .....                                                                            |      |      |      |      |      |      |      |
| 18S-Mi Meloidogyne inco  | .....                                                                            |      |      |      |      |      |      |      |
| EU306351 taxid=364564;   | .....                                                                            |      |      |      |      |      |      |      |
| EU306350.1 Nagelus obsc  | .....                                                                            |      |      |      |      |      |      |      |
| KP966493.1 Paratylenchu  | .....                                                                            |      |      |      |      |      |      |      |
| 18S-Par Paratylenchus s  | .....                                                                            |      |      |      |      |      |      |      |
| EF029855 taxid=406317;   | .....                                                                            |      |      |      |      |      |      |      |
| 18S-Pp Pratylenchus pen  | .....                                                                            |      |      |      |      |      |      |      |
| JQ957898.1 Deladenus du  | .....                                                                            |      |      |      |      |      |      |      |
| AB250212.1 Sphaerularia  | .....                                                                            |      |      |      |      |      |      |      |
| FJ969144.1 Trophurus im  | .....                                                                            |      |      |      |      |      |      |      |
| EU306352 taxid=293578;   | .....                                                                            |      |      |      |      |      |      |      |
| FJ969113 taxid=312543;   | .....                                                                            |      |      |      |      |      |      |      |
| AY284591.1 Filenchus th  | .....                                                                            |      |      |      |      |      |      |      |
| KJ869373.1 Tylenchus na  | .....                                                                            |      |      |      |      |      |      |      |
| AY284812 taxid=288453;   | .....                                                                            |      |      |      |      |      |      |      |
| AY284809.1 Paraxonchium  | .....                                                                            |      |      |      |      |      |      |      |
| EF207248.1 Mesodorylaim  | .....                                                                            |      |      |      |      |      |      |      |
| AJ966513.1 Wilsonema sc  | .....                                                                            |      |      |      |      |      |      |      |
| JX445118 taxid=1309579;  | .....                                                                            |      |      |      |      |      |      |      |
| EF207249.1 Xiphinema in  | .....                                                                            |      |      |      |      |      |      |      |
| AJ966472 taxid=344372;   | .....                                                                            |      |      |      |      |      |      |      |
| AY284807 taxid=288432;   | .....                                                                            |      |      |      |      |      |      |      |
| EF207253 taxid=288458;   | .....                                                                            |      |      |      |      |      |      |      |
| KF583882.1 Mermis nigre  | .....                                                                            |      |      |      |      |      |      |      |
| CAQS01000365 taxid=1365  | .....                                                                            |      |      |      |      |      |      |      |
| AJ966474 taxid=288489;   | .....                                                                            |      |      |      |      |      |      |      |
| AY552973 taxid=268226;   | .....                                                                            |      |      |      |      |      |      |      |
| AB361437 taxid=293883;   | .....                                                                            |      |      |      |      |      |      |      |
| AF036603 taxid=70239;    | .....                                                                            |      |      |      |      |      |      |      |
| FJ969141.1 Stenonchulus  | .....                                                                            |      |      |      |      |      |      |      |

|                           | 2010                                                                            | 2020 | 2030 | 2040 | 2050 | 2060 | 2070 | 2080 |
|---------------------------|---------------------------------------------------------------------------------|------|------|------|------|------|------|------|
|                           | .... .... .... .... .... .... .... .... .... .... .... .... .... .... ....      |      |      |      |      |      |      |      |
| LC107877 taxid=539210;    |                                                                                 |      |      |      |      |      |      |      |
| LC095813 taxid=1752120;   |                                                                                 |      |      |      |      |      |      |      |
| KC206040 taxid=446301;    |                                                                                 |      |      |      |      |      |      |      |
| 18S-Pa Plectus acuminat   |                                                                                 |      |      |      |      |      |      |      |
| KU180671 taxid=293684;    |                                                                                 |      |      |      |      |      |      |      |
| 18S-An Acrobeloides nan   |                                                                                 |      |      |      |      |      |      |      |
| EU306344.1 Acrobeloides   |                                                                                 |      |      |      |      |      |      |      |
| 18S-C Cephalobus sp       |                                                                                 |      |      |      |      |      |      |      |
| AF202152.1 Cervidellus    |                                                                                 |      |      |      |      |      |      |      |
| AY284668.1 Heterocephal   |                                                                                 |      |      |      |      |      |      |      |
| 18S-Hb Heterorhabditis    |                                                                                 |      |      |      |      |      |      |      |
| AF202156.2 Halicephalob   |                                                                                 |      |      |      |      |      |      |      |
| KC522707.1 Panagrolaimu   |                                                                                 |      |      |      |      |      |      |      |
| AY268117.1 Caenorhabdit   |                                                                                 |      |      |      |      |      |      |      |
| AF082999.2 Distolabrell   |                                                                                 |      |      |      |      |      |      |      |
| 18S-Rb Mesorhabditis be   |                                                                                 |      |      |      |      |      |      |      |
| 18S-Ot Oscheius-tipulae   |                                                                                 |      |      |      |      |      |      |      |
| AF083015.1 Teratorhabdi   |                                                                                 |      |      |      |      |      |      |      |
| 18S-Sf Steinernema felt   |                                                                                 |      |      |      |      |      |      |      |
| AY284686.1 Metateteratoce |                                                                                 |      |      |      |      |      |      |      |
| AY284683.1 Teratocephal   |                                                                                 |      |      |      |      |      |      |      |
| 18S-Dd Ditylenchus dips   |                                                                                 |      |      |      |      |      |      |      |
| AB368535 taxid=400731;    |                                                                                 |      |      |      |      |      |      |      |
| 18S-Bx Bursaphelenchus    |                                                                                 |      |      |      |      |      |      |      |
| AB368532 taxid=483518;    |                                                                                 |      |      |      |      |      |      |      |
| 18S-Cr Mesocriciconema sp |                                                                                 |      |      |      |      |      |      |      |
| KJ934161 taxid=1542464;   |                                                                                 |      |      |      |      |      |      |      |
| EF025336 taxid=411803;    |                                                                                 |      |      |      |      |      |      |      |
| JQ771537.1 Neodolichodo   |                                                                                 |      |      |      |      |      |      |      |
| JQ446376.1 Hemicaloosia   | CGCTTCTTTTATTGGCACCAAAAGCTAGAGCCCTTCGGTTACAGGCCTTGCTTGATACCGCTCGTAGGGCGAAACGGCT |      |      |      |      |      |      |      |
| EU306341.1 Hemicycclioph  |                                                                                 |      |      |      |      |      |      |      |
| KJ869397.1 Helicotylenc   |                                                                                 |      |      |      |      |      |      |      |
| AY284609.1 Rotylenchus    |                                                                                 |      |      |      |      |      |      |      |
| 18S-Mi Meloidogyne inco   |                                                                                 |      |      |      |      |      |      |      |
| EU306351 taxid=364564;    |                                                                                 |      |      |      |      |      |      |      |
| EU306350.1 Nagelus obsc   |                                                                                 |      |      |      |      |      |      |      |
| KP966493.1 Paratylenchu   |                                                                                 |      |      |      |      |      |      |      |
| 18S-Par Paratylenchus s   |                                                                                 |      |      |      |      |      |      |      |
| EF029855 taxid=406317;    |                                                                                 |      |      |      |      |      |      |      |
| 18S-Pp Pratylenchus pen   |                                                                                 |      |      |      |      |      |      |      |
| JQ957898.1 Deladenus du   |                                                                                 |      |      |      |      |      |      |      |
| AB250212.1 Sphaerularia   |                                                                                 |      |      |      |      |      |      |      |
| FJ969144.1 Trophurus im   |                                                                                 |      |      |      |      |      |      |      |
| EU306352 taxid=293578;    |                                                                                 |      |      |      |      |      |      |      |
| FJ969113 taxid=312543;    |                                                                                 |      |      |      |      |      |      |      |
| AY284591.1 Filenchus th   |                                                                                 |      |      |      |      |      |      |      |
| KJ869373.1 Tylenchus na   |                                                                                 |      |      |      |      |      |      |      |
| AY284812 taxid=288453;    |                                                                                 |      |      |      |      |      |      |      |
| AY284809.1 Paraxonchium   |                                                                                 |      |      |      |      |      |      |      |
| EF207248.1 Mesodorylaim   |                                                                                 |      |      |      |      |      |      |      |
| AJ966513.1 Wilsonema sc   |                                                                                 |      |      |      |      |      |      |      |
| JX445118 taxid=1309579;   |                                                                                 |      |      |      |      |      |      |      |
| EF207249.1 Xiphinema in   |                                                                                 |      |      |      |      |      |      |      |
| AJ966472 taxid=344372;    |                                                                                 |      |      |      |      |      |      |      |
| AY284807 taxid=288432;    |                                                                                 |      |      |      |      |      |      |      |
| EF207253 taxid=288458;    |                                                                                 |      |      |      |      |      |      |      |
| KF583882.1 Mermis nigre   |                                                                                 |      |      |      |      |      |      |      |
| CAQS01000365 taxid=1365   |                                                                                 |      |      |      |      |      |      |      |
| AJ966474 taxid=288489;    |                                                                                 |      |      |      |      |      |      |      |
| AY552973 taxid=268226;    |                                                                                 |      |      |      |      |      |      |      |
| AB361437 taxid=293883;    |                                                                                 |      |      |      |      |      |      |      |
| AF036603 taxid=70239;     |                                                                                 |      |      |      |      |      |      |      |
| FJ969141.1 Stenonchulus   |                                                                                 |      |      |      |      |      |      |      |



|                          | 2090        | 2100     | 2110       | 2120             | 2130        | 2140        | 2150          | 2160  |
|--------------------------|-------------|----------|------------|------------------|-------------|-------------|---------------|-------|
| LC107877 taxid=539210;   | .....       | .....    | .....      | .....            | .....       | .....       | .....         | ..... |
| LC095813 taxid=1752120;  | .....       | .....    | .....      | .....            | .....       | .....       | .....         | ..... |
| KC206040 taxid=446301;   | .....       | .....    | .....      | .....            | .....       | .....       | .....         | ..... |
| 18S-Pa Plectus acuminat  | .....       | .....    | .....      | .....            | .....       | .....       | .....         | ..... |
| KU180671 taxid=293684;   | .....       | .....    | .....      | .....            | .....       | .....       | .....         | ..... |
| 18S-An Acrobeloides nan  | .....       | .....    | .....      | .....            | .....       | .....       | .....         | ..... |
| EU306344.1 Acrobeloides  | .....       | .....    | .....      | .....            | .....       | .....       | .....         | ..... |
| 18S-C Cephalobus sp      | .....       | .....    | .....      | .....            | .....       | .....       | .....         | ..... |
| AF202152.1 Cervidellus   | .....       | .....    | .....      | .....            | .....       | .....       | .....         | ..... |
| AY284668.1 Heterocephal  | .....       | .....    | .....      | .....            | .....       | .....       | .....         | ..... |
| 18S-Hb Heterorhabditis   | .....       | .....    | .....      | .....            | .....       | .....       | .....         | ..... |
| AF202156.2 Halicephalob  | .....       | .....    | .....      | .....            | .....       | .....       | .....         | ..... |
| KC522707.1 Panagrolaimu  | .....       | .....    | .....      | .....            | .....       | .....       | .....         | ..... |
| AY268117.1 Caenorhabdit  | .....       | .....    | .....      | .....            | .....       | .....       | .....         | ..... |
| AF082999.2 Distolabrell  | .....       | .....    | .....      | .....            | .....       | .....       | .....         | ..... |
| 18S-Rb Mesorhabditis be  | .....       | .....    | .....      | .....            | .....       | .....       | .....         | ..... |
| 18S-Ot Oscheius-tipulae  | .....       | .....    | .....      | .....            | .....       | .....       | .....         | ..... |
| AF083015.1 Teratorhabdi  | .....       | .....    | .....      | .....            | .....       | .....       | .....         | ..... |
| 18S-Sf Steinernema felt  | .....       | .....    | .....      | .....            | .....       | .....       | .....         | ..... |
| AY284686.1 Metateratoce  | .....       | .....    | .....      | .....            | .....       | .....       | .....         | ..... |
| AY284683.1 Teratocephal  | .....       | .....    | .....      | .....            | .....       | .....       | .....         | ..... |
| 18S-Dd Ditylenchus dips  | .....       | .....    | .....      | .....            | .....       | .....       | .....         | ..... |
| AB368535 taxid=400731;   | .....       | .....    | .....      | .....            | .....       | .....       | .....         | ..... |
| 18S-Bx Bursaphelenchus   | .....       | .....    | .....      | .....            | .....       | .....       | .....         | ..... |
| AB368532 taxid=483518;   | .....       | .....    | .....      | .....            | .....       | .....       | .....         | ..... |
| 18S-Cr Mesocriconema sp  | .....       | .....    | .....      | .....            | .....       | .....       | .....         | ..... |
| KJ934161 taxid=1542464;  | .....       | .....    | .....      | .....            | .....       | .....       | .....         | ..... |
| EF025336 taxid=411803;   | .....       | .....    | .....      | .....            | .....       | .....       | .....         | ..... |
| JQ771537.1 Neodolichodo  | .....       | .....    | .....      | .....            | .....       | .....       | .....         | ..... |
| JQ446376.1 Hemicaloosia  | CTGTTGGATCC | TAAAGCAA | TGCTGAGCAG | CTGTTTGCTTCTCAAC | GTCCTCGGTGC | CATATGAGGCG | TTTGCAACAGACC |       |
| EU306341.1 Hemicycclioph | .....       | .....    | .....      | .....            | .....       | .....       | .....         | ..... |
| KJ869397.1 Helicotylenc  | .....       | .....    | .....      | .....            | .....       | .....       | .....         | ..... |
| AY284609.1 Rotylenchus   | .....       | .....    | .....      | .....            | .....       | .....       | .....         | ..... |
| 18S-Mi Meloidogyne inco  | .....       | .....    | .....      | .....            | .....       | .....       | .....         | ..... |
| EU306351 taxid=364564;   | .....       | .....    | .....      | .....            | .....       | .....       | .....         | ..... |
| EU306350.1 Nagelus obsc  | .....       | .....    | .....      | .....            | .....       | .....       | .....         | ..... |
| KP966493.1 Paratylenchu  | .....       | .....    | .....      | .....            | .....       | .....       | .....         | ..... |
| 18S-Par Paratylenchus s  | .....       | .....    | .....      | .....            | .....       | .....       | .....         | ..... |
| EF029855 taxid=406317;   | .....       | .....    | .....      | .....            | .....       | .....       | .....         | ..... |
| 18S-Pp Pratylenchus pen  | .....       | .....    | .....      | .....            | .....       | .....       | .....         | ..... |
| JQ957898.1 Deladenus du  | .....       | .....    | .....      | .....            | .....       | .....       | .....         | ..... |
| AB250212.1 Sphaerularia  | .....       | .....    | .....      | .....            | .....       | .....       | .....         | ..... |
| FJ969144.1 Trophurus im  | .....       | .....    | .....      | .....            | .....       | .....       | .....         | ..... |
| EU306352 taxid=293578;   | .....       | .....    | .....      | .....            | .....       | .....       | .....         | ..... |
| FJ969113 taxid=312543;   | .....       | .....    | .....      | .....            | .....       | .....       | .....         | ..... |
| AY284591.1 Filenchus th  | .....       | .....    | .....      | .....            | .....       | .....       | .....         | ..... |
| KJ869373.1 Tylenchus na  | .....       | .....    | .....      | .....            | .....       | .....       | .....         | ..... |
| AY284812 taxid=288453;   | .....       | .....    | .....      | .....            | .....       | .....       | .....         | ..... |
| AY284809.1 Paraxonchium  | .....       | .....    | .....      | .....            | .....       | .....       | .....         | ..... |
| EF207248.1 Mesodorylaim  | .....       | ..... </ |            |                  |             |             |               |       |

[illegible]

|                          | 2250                                            | 2260  | 2270  | 2280  |
|--------------------------|-------------------------------------------------|-------|-------|-------|
| LC107877 taxid=539210;   | .....                                           | ..... | ..... | ..... |
| LC095813 taxid=1752120;  | -----                                           | ----- | ----- | ----- |
| KC206040 taxid=446301;   | -----                                           | ----- | ----- | ----- |
| 18S-Pa_Plectus_acuminat  | -----                                           | ----- | ----- | ----- |
| KU180671 taxid=293684;   | -----                                           | ----- | ----- | ----- |
| 18S-An_Acrobelloides_nan | -----                                           | ----- | ----- | ----- |
| EU306344.1 Acrobelloides | -----                                           | ----- | ----- | ----- |
| 18S-C Cephalobus_sp      | -----                                           | ----- | ----- | ----- |
| AF202152.1 Cervidellus   | -----                                           | ----- | ----- | ----- |
| AY284668.1 Heterocephal  | -----                                           | ----- | ----- | ----- |
| 18S-Hb_Heterorhabditis_  | -----                                           | ----- | ----- | ----- |
| AF202156.2 Halicephalob  | -----                                           | ----- | ----- | ----- |
| KC522707.1 Panagrolaimu  | -----                                           | ----- | ----- | ----- |
| AY268117.1 Caenorhabdit  | -----                                           | ----- | ----- | ----- |
| AF082999.2 Distolabrell  | -----                                           | ----- | ----- | ----- |
| 18S-Rb_Mesorhabditis_be  | -----                                           | ----- | ----- | ----- |
| 18S-Ot_Oscheius-tipulae  | -----                                           | ----- | ----- | ----- |
| AF083015.1 Teratorhabdi  | -----                                           | ----- | ----- | ----- |
| 18S-Sf_Steinernema_felt  | -----                                           | ----- | ----- | ----- |
| AY284686.1 Metateratoce  | -----                                           | ----- | ----- | ----- |
| AY284683.1 Teratocephal  | -----                                           | ----- | ----- | ----- |
| 18S-Dd_Ditylenchus_dips  | -----                                           | ----- | ----- | ----- |
| AB368535 taxid=400731;   | -----                                           | ----- | ----- | ----- |
| 18S-Bx_Bursaphelenchus_  | -----                                           | ----- | ----- | ----- |
| AB368532 taxid=483518;   | -----                                           | ----- | ----- | ----- |
| 18S-Cr_Mesocriconema_sp  | -----                                           | ----- | ----- | ----- |
| KJ934161 taxid=1542464;  | -----                                           | ----- | ----- | ----- |
| EF025336 taxid=411803;   | -----                                           | ----- | ----- | ----- |
| JQ771537.1 Neodolichodo  | -----                                           | ----- | ----- | ----- |
| JQ446376.1 Hemicaloosia  | GCTTATGCTGTCGAGACAATAAACTATATTAGTCTTGCCGGTGGACC |       |       |       |
| EU306341.1 Hemicyclioph  | -----                                           | ----- | ----- | ----- |
| KJ869397.1 Helicotylenc  | -----                                           | ----- | ----- | ----- |
| AY284609.1 Rotylenchus   | -----                                           | ----- | ----- | ----- |
| 18S-Mi_Meloidogyne_inco  | -----                                           | ----- | ----- | ----- |
| EU306351 taxid=364564;   | -----                                           | ----- | ----- | ----- |
| EU306350.1 Nagelus obsc  | -----                                           | ----- | ----- | ----- |
| KP966493.1 Paratylenchu  | -----                                           | ----- | ----- | ----- |
| 18S-Par_Paratylenchus_s  | -----                                           | ----- | ----- | ----- |
| EF029855 taxid=406317;   | -----                                           | ----- | ----- | ----- |
| 18S-Pp_Pratylenchus_pen  | -----                                           | ----- | ----- | ----- |
| JQ957898.1 Deladenus du  | -----                                           | ----- | ----- | ----- |
| AB250212.1 Sphaerularia  | -----                                           | ----- | ----- | ----- |
| FJ969144.1 Trophurus im  | -----                                           | ----- | ----- | ----- |
| EU306352 taxid=293578;   | -----                                           | ----- | ----- | ----- |
| FJ969113 taxid=312543;   | -----                                           | ----- | ----- | ----- |
| AY284591.1 Filenchus th  | -----                                           | ----- | ----- | ----- |
| KJ869373.1 Tylenchus na  | -----                                           | ----- | ----- | ----- |
| AY284812 taxid=288453;   | -----                                           | ----- | ----- | ----- |
| AY284809.1 Paraxonchium  | -----                                           | ----- | ----- | ----- |
| EF207248.1 Mesodorylaim  | -----                                           | ----- | ----- | ----- |
| AJ966513.1 Wilsonema sc  | -----                                           | ----- | ----- | ----- |
| JX445118 taxid=1309579;  | -----                                           | ----- | ----- | ----- |
| EF207249.1 Xiphinema in  | -----                                           | ----- | ----- | ----- |
| AJ966472 taxid=344372;   | -----                                           | ----- | ----- | ----- |
| AY284807 taxid=288432;   | -----                                           | ----- | ----- | ----- |
| EF207253 taxid=288458;   | -----                                           | ----- | ----- | ----- |
| KF583882.1 Mermis nigre  | -----                                           | ----- | ----- | ----- |
| CAQS01000365 taxid=1365  | -----                                           | ----- | ----- | ----- |
| AJ966474 taxid=288489;   | -----                                           | ----- | ----- | ----- |
| AY552973 taxid=268226;   | -----                                           | ----- | ----- | ----- |
| AB361437 taxid=293883;   | -----                                           | ----- | ----- | ----- |
| AF036603 taxid=70239;    | -----                                           | ----- | ----- | ----- |
| FJ969141.1 Stenonchulus  | -----                                           | ----- | ----- | ----- |

Alignment of the selected 18S rRNA sequences with the primer recognition sites of both NGS primer sets annotated in yellow. A dot represents the same nucleotide as in the first sequence. A hyphen is a gap introduced during the alignment process or sequence data missing.
